# Supplementary material
Source: PubMed Central journal article supplement (PMC4409825)
Supplement: NIHMS682296-supplement-Supporting_Information.pdf [file NIHMS682296-supplement-Supporting_Information.pdf]

## **Supporting Information**

### **Elucidation of the Concise Biosynthetic Pathway of the Communesin Indole Alkaloids**

Hsiao-Ching Lin,<sup>1</sup> Grace Chiou,<sup>2</sup> Yit-Heng Chooi,<sup>3</sup> Travis C. McMahon,<sup>2</sup> Wei Xu,<sup>1</sup> Neil K. Garg<sup>2\*</sup> and Yi Tang<sup>1,2\*</sup>

1) Department of Chemical and Biomolecular Engineering, University of California, Los Angeles

2) Department of Chemistry and Biochemistry, University of California, Los Angeles

3) Plant Sciences Division, Research School of Biology, The Australian National University, Acton, Australian Capital Territory, Australia

## Table of Contents

|                                                                                                                                                           | Pages |
|-----------------------------------------------------------------------------------------------------------------------------------------------------------|-------|
| <b>Experimental Procedures</b>                                                                                                                            |       |
| Strains and culture conditions                                                                                                                            | S3    |
| Chemicals and chemical analysis                                                                                                                           | S3    |
| General molecular biology experiments                                                                                                                     | S3    |
| Whole genome sequence and analysis                                                                                                                        | S3    |
| Fungal transformation and gene deletion in <i>P. expansum</i>                                                                                             | S4    |
| Overexpression and purification of His6-tagged CnsF in <i>E. coli</i> BL21 (DE3)                                                                          | S4    |
| In vitro assay of CnsE                                                                                                                                    | S4    |
| Isolation and purification of communesin A ( <b>1</b> ) and communesin B ( <b>2</b> )                                                                     | S5    |
| Isolation and purification of communesin C ( <b>3</b> )                                                                                                   | S5    |
| Isolation and purification of communesin F ( <b>6</b> ), communesin J ( <b>13</b> ) and communesin K ( <b>14</b> )                                        | S5    |
| Isolation and purification of aurantioclavine ( <b>10</b> )                                                                                               | S6    |
| Purification of 4-L-DMAT ( <b>11</b> )                                                                                                                    | S6    |
| Isolation and purification of communesin I ( <b>12</b> )                                                                                                  | S7    |
| <b>Supplementary Tables</b>                                                                                                                               |       |
| Table S1. Primers used in this study.                                                                                                                     | S8    |
| Table S2. Deduced functions of genes within the <i>cns</i> cluster.                                                                                       | S10   |
| Table S3. <sup>1</sup> H NMR (500 MHz) and <sup>13</sup> C NMR (125 MHz) spectroscopic data of communesin A ( <b>1</b> ) in CDCl <sub>3</sub>             | S11   |
| Table S4. <sup>1</sup> H NMR (500 MHz) and <sup>13</sup> C NMR (125 MHz) spectroscopic data of communesin B ( <b>2</b> ) in CDCl <sub>3</sub>             | S12   |
| Table S5. <sup>1</sup> H NMR (500 MHz) and <sup>13</sup> C NMR (125 MHz) spectroscopic data of communesin C ( <b>3</b> ) in CD <sub>3</sub> OD            | S13   |
| Table S6. <sup>1</sup> H NMR (500 MHz) and <sup>13</sup> C NMR (125 MHz) spectroscopic data of communesin F ( <b>6</b> ) in CDCl <sub>3</sub>             | S14   |
| Table S7. <sup>1</sup> H NMR (500 MHz) and <sup>13</sup> C NMR (125 MHz) spectroscopic data of (–)-aurantioclavine ( <b>10</b> ) in CDCl <sub>3</sub>     | S15   |
| Table S8. <sup>1</sup> H NMR (500 MHz) spectroscopic data of 4-L-DMAT ( <b>11</b> ) in CDCl <sub>3</sub>                                                  | S16   |
| Table S9. <sup>1</sup> H NMR (500 MHz) and <sup>13</sup> C NMR (125 MHz) spectroscopic data of communesin I ( <b>12</b> ) in CDCl <sub>3</sub>            | S17   |
| Table S10. <sup>1</sup> H NMR (500 MHz), <sup>13</sup> C NMR (125 MHz), and 2D-NMR spectroscopic data of communesin J ( <b>13</b> ) in CDCl <sub>3</sub>  | S18   |
| Table S11. <sup>1</sup> H NMR (500 MHz), <sup>13</sup> C NMR (125 MHz), and 2D-NMR spectroscopic data of communesin K ( <b>14</b> ) in CD <sub>3</sub> OD | S19   |
| <b>Supplementary Figures</b>                                                                                                                              |       |
| Figure S1. Targeted deletion of <i>cnsA</i> and PCR screening                                                                                             | S20   |
| Figure S2. Targeted deletion of <i>cnsB</i> and PCR screening                                                                                             | S21   |
| Figure S3. Targeted deletion of <i>cnsC</i> and PCR screening                                                                                             | S22   |
| Figure S4. Targeted deletion of <i>cnsE</i> and PCR screening                                                                                             | S23   |
| Figure S5. Targeted deletion of <i>cnsF</i> and PCR screening                                                                                             | S23   |
| Figure S6. Targeted deletion of <i>cnsI</i> and PCR screening                                                                                             | S24   |
| Figure S7. Targeted deletion of <i>cnsJ</i> and PCR screening                                                                                             | S25   |
| Figure S8. Targeted deletion of <i>cnsK</i> and PCR screening                                                                                             | S26   |
| Figure S9. Recombinant CnsF purified from <i>E. coli</i> BL-21 (DE3) and SDS-PAGE analysis                                                                | S27   |
| Figure S10. LC-MS analysis of in vitro assays of CnsF with L-tryptophan and tryptamine                                                                    | S27   |
| Figure S11. <sup>1</sup> H NMR spectrum of <b>1</b> (CDCl <sub>3</sub> , 500 MHz)                                                                         | S28   |
| Figure S12. <sup>13</sup> C NMR spectrum of <b>1</b> (CDCl <sub>3</sub> , 125 MHz)                                                                        | S29   |

|                                                                                     |     |
|-------------------------------------------------------------------------------------|-----|
| Figure S13. <sup>1</sup> H NMR spectrum of <b>2</b> (CDCl <sub>3</sub> , 500 MHz)   | S30 |
| Figure S14. <sup>13</sup> C NMR spectrum of <b>2</b> (CDCl <sub>3</sub> , 125 MHz)  | S31 |
| Figure S15. <sup>1</sup> H NMR spectrum of <b>3</b> (CD <sub>3</sub> OD, 500 MHz)   | S32 |
| Figure S16. <sup>13</sup> C NMR spectrum of <b>3</b> (CD <sub>3</sub> OD, 125 MHz)  | S33 |
| Figure S17. <sup>1</sup> H NMR spectrum of <b>6</b> (CDCl <sub>3</sub> , 500 MHz)   | S34 |
| Figure S18. <sup>13</sup> C NMR spectrum of <b>6</b> (CDCl <sub>3</sub> , 125 MHz)  | S35 |
| Figure S19. <sup>1</sup> H NMR spectrum of <b>10</b> (CDCl <sub>3</sub> , 500 MHz)  | S36 |
| Figure S20. <sup>13</sup> C NMR spectrum of <b>10</b> (CDCl <sub>3</sub> , 125 MHz) | S37 |
| Figure S21. <sup>1</sup> H NMR spectrum of <b>11</b> (CD <sub>3</sub> OD, 500 MHz)  | S38 |
| Figure S22. <sup>1</sup> H NMR spectrum of <b>12</b> (CDCl <sub>3</sub> , 500 MHz)  | S39 |
| Figure S23. <sup>13</sup> C NMR spectrum of <b>12</b> (CDCl <sub>3</sub> , 125 MHz) | S40 |
| Figure S24. <sup>1</sup> H NMR spectrum of <b>13</b> (CDCl <sub>3</sub> , 500 MHz)  | S41 |
| Figure S25. <sup>13</sup> C NMR spectrum of <b>13</b> (CDCl <sub>3</sub> , 125 MHz) | S42 |
| Figure S26. HSQC135 spectrum of <b>13</b> (CDCl <sub>3</sub> , 500 MHz)             | S43 |
| Figure S27. HMBC spectrum of <b>13</b> (CDCl <sub>3</sub> , 500 MHz)                | S44 |
| Figure S28. <sup>1</sup> H NMR spectrum of <b>14</b> (CD <sub>3</sub> OD, 500 MHz)  | S45 |
| Figure S29. <sup>13</sup> C NMR spectrum of <b>14</b> (CD <sub>3</sub> OD, 125 MHz) | S46 |
| Figure S30. HSQC-135 spectrum of <b>14</b> (CD <sub>3</sub> OD, 500 MHz)            | S47 |
| Figure S31. HMBC spectrum of <b>14</b> (CD <sub>3</sub> OD, 500 MHz)                | S48 |
| Figure S32. NOESY spectrum of <b>14</b> (CD <sub>3</sub> OD, 500 MHz)               | S49 |
| Figure S33. UV and MS spectra of <b>1-3</b> , <b>6</b> and <b>12</b>                | S50 |
| Figure S34. UV and MS spectra of <b>10</b> , <b>11</b> , <b>13</b> and <b>14</b>    | S51 |
| <b>Supplementary References</b>                                                     | S52 |

## Supplementary Experimental Procedures

**Strains and Culture Conditions.** *Penicillium expansum* NRRL 976 was a kind gift obtained from Professor Jens C. Frisvad from Technical University of Denmark. The strain was maintained on YG-agar (4 g/L yeast extract, 4 g/L dextrose, 16 g/L agar) or glucose minimal media (GMM)<sup>[1]</sup> media and stored as 30% glycerol stocks at -70°C. For production of **1**, **2** and other intermediates, *P. expansum* and mutant strains were cultured in YG-agar. Total RNA for RT-PCR is extracted from *P. expansum* grown on Czapek-Dox liquid medium with 5 g/L yeast extract (CYB) after 4 days of cultivation. For chemical complementation of  $\Delta cnsA$ ,  $\Delta cnsB$  and  $\Delta cnsF$  mutants, tryptamine or purified **10** was supplemented to the YG-agar at 100 or 40  $\mu\text{g/nL}$ , respectively. *Escherichia coli* BL21 (DE3) (Novagen) was used as the *E. coli* expression strain.

**Chemicals and Chemical Analysis.** All solvents and other chemicals used were of analytical grade. All LC-MS analyses were performed on a Shimadzu 2010 EV LC-MS (Phenomenex® Luna, 5 $\mu$ , 2.0  $\times$  100 mm, C18 column) using positive and negative mode electrospray ionization with a linear gradient of 5–95% MeCN-H<sub>2</sub>O in 30 minutes followed by 95% MeCN for 15 minutes with a flow rate of 0.1 mL/min. <sup>1</sup>H, <sup>13</sup>C and 2D NMR spectra were obtained on Bruker AV500 spectrometer with a 5 mm dual cryoprobe or a Bruker DRX500 spectrometer with a 5 mm broadband probe at the UCLA Molecular Instrumentation Center.

**General Molecular Biology Experiments.** General molecular cloning techniques were as described elsewhere.<sup>[2]</sup> PCR was performed using Phusion® DNA Polymerase (New England Biolabs) or Takara Primer star HS polymerase (Clontech, USA). DNA restriction enzymes were used as recommended by the manufacturer (New England Biolabs). PCR products were confirmed by DNA sequencing. *E. coli* TOP10 (Invitrogen) and XL1-Blue were used for cloning, following standard recombinant DNA techniques. RNA extraction was performed using a RiboPure Yeast Kit (Ambion) and ImProm-II<sup>TM</sup> Reverse Transcription System for RT-PCR (Invitrogen) was used to synthesize complementary DNA (cDNA) from total RNA.

**Whole Genome Sequence and Analysis.** Genomic sequencing of *P. expansum* NRRL 976 was performed by Ambry Genetics Corp. (USA) using the next-generation sequencing technology Illumina HiSeq2000 system. The genome sequence was assembled by the software SOAPdenovo<sup>[3]</sup> using the UCLA Hoffman2 computer cluster to yield 181 contigs covering approximately 32.9 Mb. Gene structure predictions were performed using the FGENESH program (Softberry) and manually checked by comparing with homologous gene/proteins in the GenBank database using BLASTX analysis. Functional domains in the translated protein sequences were predicted using Conserved Domain Search (NCBI) or InterproScan (EBI). CLUSTALW or BIOEDIT software package is used for multiple sequence alignment.

**Fungal Transformation and Gene Deletion in *P. expansum*.** Deletion cassettes were generated using a fusion PCR technique<sup>[4]</sup> and followed the hygromycin-resistance split-marker approach for gene deletion previously described using *hph* cassette encodes hygromycin B phosphotransferase as the selectable marker.<sup>[5]</sup> Briefly, approximately 3.0 kb of 5' flanking region and 3' flanking region were PCR amplified from each targeted loci in the *P. expansum* genomic DNA using the corresponding primer pairs p1 & p3 and p4 & p6. *hph* cassette was PCR amplified from pAN7.1 using the corresponding primer pairs p3R and p4F. The two initial fragments containing 5' flanking region and 3' flanking region were fused to the *hph* fragment using the corresponding primer pairs p2 & HY-R, and YG-F & p5, respectively. All primers used in this study are listed in Table S1. Conidia from *P. expansum* was inoculated to 250 mL liquid GMM for 16 hours at 25°C, 250 rpm for germination. The harvested germlings were then digested with 3 mg/mL lysing enzymes (Sigma-Aldrich) and 2 mg/mL Yatalase (Takara Bio) to obtain the protoplasts, which were then transformed with the two split marker-knockout cassettes. After polyethylene glycol (PEG)-mediated transformation, the protoplasts were inoculated into GMM media supplemented with 1.2 M sorbitol, agar and 250 µg/mL of hygromycin B (A.C. Scientific Inc.) as a selective agent. Genomic DNA from the transformants was isolated using Carlson lysis buffer and chloroform extraction followed by precipitation of DNA in the aqueous phase by addition of an equal volume of isopropanol. Gene replacements were confirmed by the PCR screening method (Figure S1–S8), using the primers listed in Table S1.

**Overexpression and Purification of His6-tagged CnsF in *E. coli*.** The cDNA of *cnsF* was obtained by RT-PCR. The intron-less DNA fragment was inserted into the pET30 Xa/LIC vector (EMD Millipore). Primers used for the amplification and cloning are listed in Table S1. Expression plasmid pET30-*cnsF* was transformed into electrocompetent *E. coli* BL21 (DE3). The cells were cultured at 37°C, 250 rpm in 500 mL of LB medium with 35 µg/mL kanamycin. 0.1 mM isopropylthio-β-D-galactoside (IPTG) to induce protein expression was added at OD<sub>600</sub> between 0.4 to 0.6 and the cells were further culture for 12–16 h at 16°C. The cells were then harvested by centrifugation (3500 rpm, 15 min, 4°C), resuspended in ~25 mL lysis buffer (100 mM Tris-HCL, pH 7.4, 0.1 M NaCl, 20 mM imidazole), and lysed by sonication on ice. Cell debris was removed by centrifugation (15000 rpm, 30 min, 4°C). The His6-tagged proteins were purified by using Ni-NTA agarose (Qiagen) according to manufacturer's instructions. Purified enzyme was checked by SDS-PAGE (Figure S9), concentrated and exchanged into buffer A (50 mM Tris-HCl, pH 7.9, 2 mM EDTA, 2 mM DTT) + 10% glycerol with the centriprep filters (Amicon) and stored at -8°C for enzyme assays.

**In vitro assay of CnsF.** For the in vitro synthesis of 4-L-DMAT (**11**), 20 µM CnsF was incubated with 50 µM L-tryptophan, 50 µM dimethylallyl pyrophosphate (DMAPP) and 10 mM MgCl<sub>2</sub> in 100 mM Tris-HCl (pH 7.5). The same condition was performed as described above when taking 20 µM tryptamine as substrate. The reaction was incubated at 14 h and extracted

twice with ethyl acetate. The organic phases were dried and dissolved in 20  $\mu$ L MeOH and subjected for analysis by LC-MS as described in Chemical Analysis (Figure S10).

**Isolation and Purification of communesin A (1) and communesin B (2).** *P. expansum* NRRL 976 was cultivated on YG agar (4L) at 25 °C for 4 d, then extracted with acetone (4 L). The acetone extract was concentrated *in vacuo* and the resultant aqueous mixture (800 mL) was extracted with EtOAc (4  $\times$  500 mL). The combined organics were dried over MgSO<sub>4</sub> and concentrated *in vacuo*. The crude products were purified by flash chromatography (3:1  $\rightarrow$  3:2 hexanes : acetone) to provide communesin A (1) (8.2 mg), which was further purified by preparative thin layer chromatography (1 : 1 hexanes : acetone), and communesin B (2) (8.4 mg), which was further purified by preparative thin layer chromatography (2 : 1 hexanes : acetone). All spectral data for 1 and 2 were consistent with that in the literature.<sup>[6, 7]</sup>

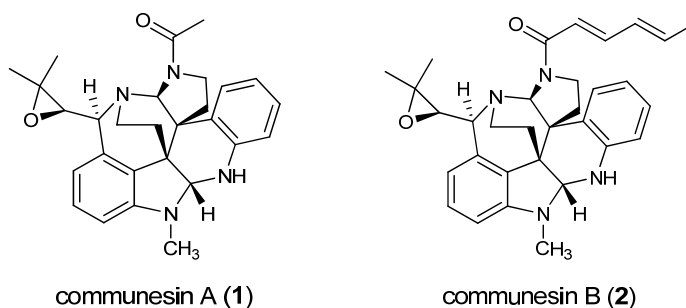

**Isolation and Purification of communesin C (3).** The  $\Delta$ *cnsE* mutant strain was cultivated on YG agar (4L) at 25°C for 4d and extracted with acetone (4 L). The acetone extract was concentrated *in vacuo* and the resultant aqueous mixture (900 mL) was extracted with EtOAc (2  $\times$  700 mL) and concentrated *in vacuo*. The crude products were purified by RP-18 column (RediSep Rf Gold C18 Column, 20–40 $\mu$ , 15.5g) with CombiFlash Rf200 system and further purified by a Sephadex LH-20 column (35  $\times$  1.2 cm, MeOH) to yield communesin C (3) (1.2 mg).<sup>[7]</sup>

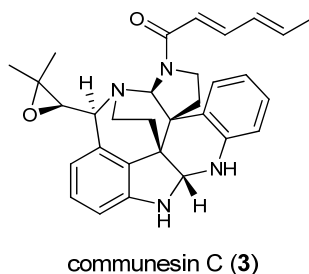

**Isolation and Purification of communesin F (6), communesin J (13) and communesin K (14).** The  $\Delta$ *cnsJ* mutant strain was cultivated on YG agar (6L) at 25 °C for 4 d, and extracted with acetone (6 L). The acetone extract was concentrated *in vacuo* and the resultant aqueous mixture (1000 mL) was extracted with EtOAc (3  $\times$  1000 mL). The combined organics were washed with brine (1500 mL), dried over MgSO<sub>4</sub>, and concentrated *in vacuo*. The crude products were

separated by a Sephadex LH-20 column (35 × 1.2 cm, MeOH) followed by purification on a Silica gel column (RediSep®, 40 g Flash Column, 9 : 1 → 11 : 9 hexane : acetone gradient) to yield three fractions (Fr.1–3). Fr2 was purified by flash chromatography (5 : 1 → 4 : 1 hexane : acetone) to provide communesin F (**6**) (8.3 mg) and communesin J (**13**) (7.4 mg). All spectral data for **6** was consistent with that in the literature.<sup>[8]</sup> Fr.3 was further purified a semi-preparative RP-18 HPLC column (Luna®, ODS-3, 5 μm, 250 × 10 mm) eluted by 27% MeCN<sub>aq</sub> with flow rate of 2.7 mL/min to give communesin K (**14**) (0.7 mg, *t*<sub>R</sub>: 41.0 min).

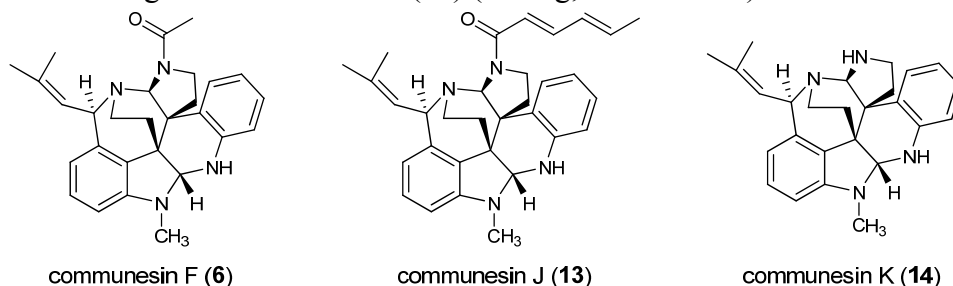

**Isolation and Purification of aurantioclavine (10).** The *ΔcnsC* mutant strain was cultivated on YG agar (14L) at 25°C for 4 d and extracted with acetone (14 L). The acetone extract was concentrated *in vacuo* and the resultant aqueous mixture (6000 mL) was split into three 2000 mL batches and extracted with EtOAc (4 × 600 mL). The combined organics were washed with brine (1000 mL), dried over MgSO<sub>4</sub>, and concentrated *in vacuo*. The crude product was purified by flash chromatography (33 : 17 : 1 hexanes : EtOAc : Et<sub>3</sub>N) followed by preparative thin layer chromatography (25 : 25 : 1 hexanes : EtOAc : Et<sub>3</sub>N) to provide aurantioclavine (**10**) (69.2 mg). All spectral data for **10** was consistent with that reported in the literature.<sup>[9]</sup>

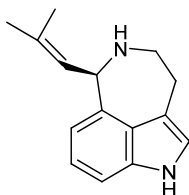

(-)-aurantioclavine (**10**)

**Purification of 4-L-DMAT (11).** A solution with a total volume of 10 mL comprised of 20 μM CnsF, 50 μM L-tryptophan, 50 μM dimethylallyl pyrophosphate (DMAPP) (Echelon Biosciences, or synthesized according to McIntosh et. al.<sup>[10]</sup>) and 10 mM MgCl<sub>2</sub> in 100 mM Tris-HCl (pH 7.5) was incubated at room temperature. After a 14h-incubation, the reaction was extracted with ethyl acetate (2 × 10 mL). The combined organic phases were dried *in vacuo* and subjected to a semi-preparative RP-18 HPLC column (Luna®, ODS-3, 5 μm, 250 × 10 mm) eluted by 30% MeCN<sub>aq</sub> with flow rate of 2.7 mL/min to give **11** (0.2 mg, *t*<sub>R</sub>: 21.6 min). All spectral data for **11** was consistent with that reported in the literature.<sup>[11]</sup>

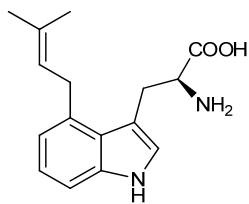

4-L-DMAT (11)

**Isolation and Purification of communesin I (12).** The  $\Delta cnsK$  mutant strain was cultivated on YG agar (4L) at 25 °C for 4 d and extracted with acetone (4 L). The acetone extract was concentrated *in vacuo* and the resultant aqueous mixture (1000 mL) was extracted with EtOAc (3  $\times$  200 mL). The combined organics were washed with brine (300 mL), dried over MgSO<sub>4</sub>, and concentrated *in vacuo*. The crude product was purified by a Sephadex LH-20 column (35  $\times$  1.2 cm, MeOH) followed by flash chromatography (97 : 2 : 1  $\rightarrow$  94 : 5 : 1 CH<sub>2</sub>Cl<sub>2</sub> : MeOH : Et<sub>3</sub>N) followed by a second Sephadex LH-20 column (35  $\times$  1.2 cm, MeOH : CH<sub>2</sub>Cl<sub>2</sub> = 7 : 3) to afford communesin I (12).

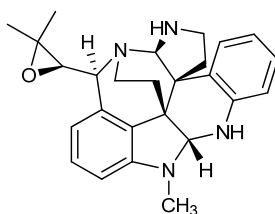

communesin I (12)



## Supplementary Tables

**Table S1.** Primers used in this study

| Primer name          | Sequence (5' → 3')                            |
|----------------------|-----------------------------------------------|
| <i>consA</i> -KO-p1  | ggagacggfatggfagtacgac                        |
| <i>consA</i> -KO-p2  | gaactcgatgcgctggaccag                         |
| <i>consA</i> -KO-p3  | ccgtccgtctctccgatggatgctgaggtggacggcac        |
| <i>consA</i> -KO-p4  | ccactccacatctccactcgagagcgatgctgctcaagc       |
| <i>consA</i> -KO-p5  | gtccgagggatgggagcag                           |
| <i>consA</i> -KO-p6  | ccatgtgctatgtgtccggatc                        |
| <i>consA</i> -KO-p3F | gtgccgtccactcagcatccatgcggagagacggacgg        |
| <i>consA</i> -KO-p4R | gcttgagagccagcaatcgtctcagtgagtgagatggagtg     |
| <i>consB</i> -KO-p1  | cgaccggctcaatgtaccggag                        |
| <i>consB</i> -KO-p2  | ctcaccgctatgctctctcaagc                       |
| <i>consB</i> -KO-p3  | gtccgtccgtctctccgatgccaacacaatgccacttgcg      |
| <i>consB</i> -KO-p4  | cccactccacatctccactcgagcattcagttccgacaatagg   |
| <i>consB</i> -KO-p5  | ccaatacacggttgcggaagtcgg                      |
| <i>consB</i> -KO-p6  | caaacctctcaggaccacagtgcg                      |
| <i>consB</i> -KO-p3F | cgcaagtggcattgtgtggcatcggagagacggacggac       |
| <i>consB</i> -KO-p4R | cctattgtccgaactggatgctcctcagtgagatgtggagtg    |
| <i>consC</i> -KO-p1  | ggaaagtctccacgctcgaatc                        |
| <i>consC</i> -KO-p2  | gcatggcccaggtagcagc                           |
| <i>consC</i> -KO-p3  | ccgtccgtctctccgatggagagcaacttggagtgggcc       |
| <i>consC</i> -KO-p4  | cccactccacatctccactcgagcgcacgtccgccaagtc      |
| <i>consC</i> -KO-p5  | gatgctgagtgagcggcac                           |
| <i>consC</i> -KO-p6  | ggccggaccgaaatcaagttcc                        |
| <i>consC</i> -KO-p3F | ggcccactcgaagtgctctccatcggagagacggacgg        |
| <i>consC</i> -KO-p4R | gacttggccgacgtgcgctcagtgagatgtggagtg          |
| <i>consE</i> -KO-p1  | ggacatgctaggcacaagcctt                        |
| <i>consE</i> -KO-p2  | ccgtctcaacgttgaagatac                         |
| <i>consE</i> -KO-p3  | ccgtccgtctctccgatgggcaaggcaatagctctcag        |
| <i>consE</i> -KO-p4  | cccactccacatctccactcgactatcactcgagagcgcctctag |
| <i>consE</i> -KO-p5  | gcatttggccgaaggtggcag                         |
| <i>consE</i> -KO-p6  | gtaggctcgtgtgattatcgg                         |
| <i>consE</i> -KO-p3F | ctgagagctattgcccttgacctcggagagacggacgg        |
| <i>consE</i> -KO-p4R | ctagagcgcctctcagtgataatcagtgagatgtggagtg      |
| <i>consF</i> -KO-p1  | gatatgggtgacttgagggcagc                       |
| <i>consF</i> -KO-p2  | gcagcaggcagtagcacaag                          |
| <i>consF</i> -KO-p3  | gtccgtccgtctctccgatgctactcccccaagcggcaatac    |
| <i>consF</i> -KO-p4  | cccactccacatctccactcgagatgattagggacatgctatg   |
| <i>consF</i> -KO-p5  | cttgggtgcgcccgaagcag                          |
| <i>consF</i> -KO-p6  | gctactggccagcggtaacg                          |
| <i>consF</i> -KO-p3F | ggfattgccgcttggggagtaggcatcggagagacggacggac   |
| <i>consF</i> -KO-p4R | catgacatgtcccctaatacctcctcagtgagatgtggagtg    |
| <i>consI</i> -KO-p1  | cacaagcacttcccaccagg                          |
| <i>consI</i> -KO-p2  | gggaccgctgtgacagtgc                           |
| <i>consI</i> -KO-p3  | ccgtccgtctctccgatggctgttctcaaggctgcagc        |
| <i>consI</i> -KO-p4  | ccactccacatctccactcgactgctggaggtcccaggtag     |
| <i>consI</i> -KO-p5  | gcgtaccaggaatcactatgc                         |
| <i>consI</i> -KO-p6  | gagcccagatgggataagtcactc                      |
| <i>consI</i> -KO-p3F | ctgagcagccttgagaacgacctcggagagacggacgg        |
| <i>consI</i> -KO-p4R | ctactgggacctccagcaagtcgagtgagatgtggagtg       |
| <i>consJ</i> -KO-p1  | gctctcggaaacctgtgc                            |
| <i>consJ</i> -KO-p2  | ggcttggaaatgtatgccactgatgc                    |
| <i>consJ</i> -KO-p3  | ccgtccgtctctccgatggacatcgtcgggtgcggatg        |
| <i>consJ</i> -KO-p4  | cccactccacatctccactcgagcggacgatggtgtatgaagc   |
| <i>consJ</i> -KO-p5  | gcatcaccagatccagcctactag                      |
| <i>consJ</i> -KO-p6  | ctcaaggctgcacttcacctc                         |

|                                     |                                                            |
|-------------------------------------|------------------------------------------------------------|
| <i>cnsJ</i> -KO-p3F                 | catccgccaccgacgatgtccatcggagagacggacgg                     |
| <i>cnsJ</i> -KO-p4R                 | gcttcataccaccatcgtcctcgtcga <del>tg</del> ggagatgtggagtggg |
| <i>cnsK</i> -KO-p1                  | gggtgttacagccgatgcagctgtg                                  |
| <i>cnsK</i> -KO-p2                  | ggccttgataaacggccatctcg                                    |
| <i>cnsK</i> -KO-p3                  | gtccgtccgtctctccgatgggtgggccgagatataggac                   |
| <i>cnsK</i> -KO-p4                  | cccactccacatctccactcga <del>gg</del> cagggacagggtagaggac   |
| <i>cnsK</i> -KO-p5                  | catcggcatggcactgtacgg                                      |
| <i>cnsK</i> -KO-p6                  | gtgcatcagcatcgcgcatcgtc                                    |
| <i>cnsK</i> -KO-p3F                 | gtccctatatctcggcaccacccatcggagagacggacggac                 |
| <i>cnsK</i> -KO-p4R                 | gtcctctaccctgtccctgcctcga <del>tg</del> ggagatgtggagtggg   |
| CnsF-XALIC-F                        | ggtattgagggtcgcgatggcacacatgacatgtccc                      |
| CnsF-XALIC-R                        | agaggagagttagaccctaggcacaagccttggcg                        |
| anchored oligo-dT<br>reverse primer | TTTTTTTTTTTTTTTTTTTTTTVN                                   |

**Table S2.** Deduced functions of genes within the *cns* cluster.

| <i>Penicillium expansum</i> NRRL 976, Scaffold 19 (27,965 – 74,677), 46.7 kbp |                     |                                        |                         |                                                                                                   |                                                      |                                                                        |                         |
|-------------------------------------------------------------------------------|---------------------|----------------------------------------|-------------------------|---------------------------------------------------------------------------------------------------|------------------------------------------------------|------------------------------------------------------------------------|-------------------------|
| Gene name                                                                     | Size (gene/protein) | BLASTP homologs <sup>a</sup>           | Identity/similarity (%) | Conserved domain <sup>b</sup>                                                                     | Function <sup>c</sup>                                | Gene locus in NCBI database ( <i>P. expansum</i> strain d1, contig 72) | Identity/similarity (%) |
| <i>cnsP</i>                                                                   | 1113/370            | PROQFM164_S01g000406                   | 95/98                   | Taurine catabolism dioxygenase TauD, TfdA family, pfam02668                                       | alpha-ketoglutarate-dependent dioxygenase            | PEXP_030610                                                            | 100/100                 |
| <i>cnsO</i>                                                                   | 1491/496            | CGGC5_280                              | 64/76                   | The Major Facilitator Superfamily (MFS), cd06174                                                  | MFS transporter                                      | PEXP_030600                                                            | 96/95                   |
| <i>cnsN</i>                                                                   | 2580/859            | PROQFM164_S01g000403                   | 80/87                   | GAL4-like Zn2Cys6 binuclear cluster DNA-binding domain, cd00067                                   | Zn2Cys6 fungal-type transcriptional factor           | PEXP_030590                                                            | 86/85                   |
| <i>cnsM</i>                                                                   | 1080/359            | UCRPA7_4326                            | 85/92                   | Taurine catabolism dioxygenase TauD, TfdA family, pfam02668                                       | alpha-ketoglutarate-dependent dioxygenase            | PEXP_030580                                                            | 100/100                 |
| <i>cnsL</i>                                                                   | 1530/509            | UCRPA7_4325                            | 78/88                   | The Major Facilitator Superfamily (MFS), cd06174                                                  | MFS transporter                                      | PEXP_030570                                                            | 94/94                   |
| <i>cnsK</i>                                                                   | 1401/466            | AFUA_2G18020                           | 34/51                   | Transferase family, pfam02458                                                                     | <i>N</i> -acyltransferase <sup>†</sup>               | PEXP_030560                                                            | 100/100                 |
| <i>cnsJ</i>                                                                   | 1002/333            | NFIA_093740, FtmF                      | 26/40                   | Phytanoyl-CoA dioxygenase (PhyH), pfam05721                                                       | phytanoyl-CoA dioxygenase <sup>†</sup>               | PEXP_030550                                                            | 100/100                 |
| <i>cnsI</i>                                                                   | 7071/2356           | ANI_1_1948094                          | 54/69                   | KS-AT-DH-ER-KR-ACP                                                                                | polyketide synthase <sup>†</sup>                     | PEXP_030540                                                            | 99/99                   |
| <i>cnsH</i>                                                                   | 837/278             | MPH_06429                              | 30/45                   | Serine hydrolase (FSH1), pfam03959                                                                | Serine hydrolase                                     | PEXP_030530                                                            | 100/100                 |
| <i>cnsG</i>                                                                   | 1092/363            | HMPREF1120_08694                       | 51/67                   | Uncharacterized subfamily of fatty acid CoA ligase (FACL), cd05917                                | long-chain fatty-acid-CoA ligase                     | PEXP_030520                                                            | 98/98                   |
| <i>cnsF</i>                                                                   | 1362/453            | MCYG_06055                             | 61/77                   | cd13929, aromatic prenyltransferases (PTases) of the DMATS/CymD family                            | 4-dimethylallyl tryptophan synthase <sup>†</sup>     | PEXP_030510                                                            | 100/100                 |
| <i>cnsE</i>                                                                   | 831/276             | <i>Streptomyces clavuligerus</i> StaMa | 44/57                   | <i>S</i> -adenosylmethionine-dependent methyltransferases (SAM or AdoMet-MTase), class I, cd02440 | methyltransferase <sup>†</sup>                       | PEXP_030500                                                            | 100/100                 |
| <i>cnsD</i>                                                                   | 1431/476            | <i>Epichloe canadensis</i> , EasC      | 59/72                   | cd08157, Fungal catalases similar to yeast catalases A and T                                      | aurantioclavine catalase protein                     | PEXP_030490                                                            | 100/100                 |
| <i>cnsC</i>                                                                   | 1272/423            | MCYG_04917                             | 36/55                   | Cytochrome P450, pfam00067                                                                        | cytochrome P450 <sup>†</sup>                         | PEXP_030480                                                            | 96/96                   |
| <i>cnsB</i>                                                                   | 1365/454            | <i>Catharanthus roseus</i> , TDC       | 27/46                   | DOPA decarboxylase family, cd06450                                                                | tryptophan decarboxylase <sup>†</sup>                | PEXP_030470                                                            | 100/100                 |
| <i>cnsA</i>                                                                   | 1767/588            | <i>Epichloe canadensis</i> , EasE      | 50/67                   | FAD binding domain, pfam01565                                                                     | aurantioclavine synthase/oxidoreductase <sup>†</sup> | PEXP_030460                                                            | 100/100                 |

<sup>a</sup> If available, the closest characterized homologs is shown or the locus tag of the closest BLASTP homologs if there is no characterized ones.

<sup>b</sup> Conserved domain is based on analysis by NCBI Conserved Domain Search. For CnsI, the abbreviations for the conserved domains are KS, beta-ketoacyl synthase; AT, malonyl-CoA:transacylase; DH, dehydratase; ER, enoyl reductase; KR; ketoreductase; ACP, acyl carrier protein.

<sup>c</sup> Dagger (†) indicates the function of the encoded protein has been verified by gene deletion and/or in vitro experiments.

**Table S3.**  $^1\text{H}$  NMR (500 MHz) and  $^{13}\text{C}$  NMR (125 MHz) spectroscopic data of communesin A (**1**) in  $\text{CDCl}_3$ .

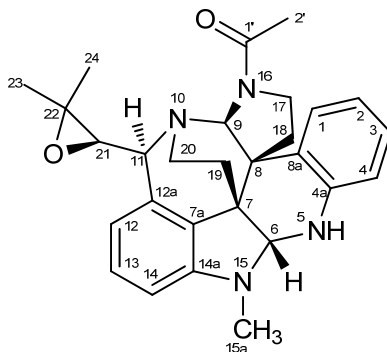

| no. | $\delta_{\text{H}}$ (mult, $J$ (Hz)) | $\delta_{\text{C}}$ (mult) |
|-----|--------------------------------------|----------------------------|
| 1   | 6.61–6.74 (m)                        | 123.2 d                    |
| 2   | 6.61–6.74 (m)                        | 120.6 d                    |
| 3   | 7.01 (dt, 7.6, 1.8)                  | 127.4 d                    |
| 4   | 6.71 (br.d, 7.6)                     | 116.9 d                    |
| 4a  |                                      | 142.6 s                    |
| 6   | 4.70 (s)                             | 82.4 d                     |
| 7   |                                      | 51.4 s                     |
| 7a  |                                      | 132.4 s                    |
| 8   |                                      | 51.9 s                     |
| 8a  |                                      | 132.2 s                    |
| 9   | 5.02 (s)                             | 79.6 d                     |
| 11  | 4.08 (d, 9.1)                        | 65.4 d                     |
| 12  | 6.06 (d, 7.6)                        | 113.2 d                    |
| 12a |                                      | 136.8 s                    |
| 13  | 6.88 (t, 7.6)                        | 128.9 d                    |
| 14  | 5.95 (d, 7.6)                        | 101.8 d                    |
| 14a |                                      | 150.5 s                    |
| 15a | 2.84 (s)                             | 29.6 d                     |
| 17A | 3.89 (dd, 11.6, 8.7)                 | 44.1 t                     |
| 17B | 3.01 (dt, 11.6, 7.5)                 |                            |
| 18A | 2.74 (ddd, 13.2, 11.7, 9.0)          | 30.8 t                     |
| 18B | 1.97 (dd, 13.2, 7.1)                 |                            |
| 19A | 2.36 (m)                             | 38.0 t                     |
| 19B | 2.27 (m)                             |                            |
| 20A | 3.47 (br.dd, 15.5, 10.0)             | 36.3 t                     |
| 20B | 3.36 (dt, 15.5, 8.5)                 |                            |
| 21  | 2.87 (d, 8.8)                        | 64.0 d                     |
| 22  |                                      | 59.8 s                     |
| 23  | 1.38 (s)                             | 24.8 q                     |
| 24  | 1.53 (s)                             | 20.5 q                     |
| 1'  |                                      | 172.0 s                    |
| 2'  | 2.33 (s)                             | 22.6 q                     |

**Table S4.**  $^1\text{H}$  NMR (500 MHz) and  $^{13}\text{C}$  NMR (125 MHz) spectroscopic data of communesin B (2) in  $\text{CDCl}_3$ .

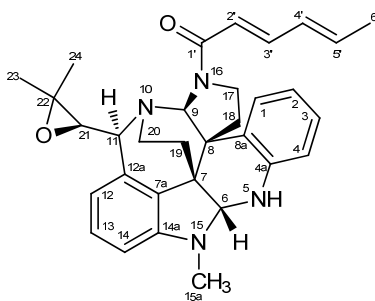

| no. | $\delta_{\text{H}}$ (mult, $J$ (Hz)) | $\delta_{\text{C}}$ (mult) |
|-----|--------------------------------------|----------------------------|
| 1   | 6.62–6.71 (m)                        | 123.4 d                    |
| 2   | 6.62–6.71 (m)                        | 120.5 d                    |
| 3   | 6.98 (m)                             | 127.5 d                    |
| 4   | 6.62–6.71 (m)                        | 116.8 d                    |
| 4a  |                                      | 142.6 s                    |
| 6   | 4.70 (s)                             | 82.3 d                     |
| 7   |                                      | 51.3 s                     |
| 7a  |                                      | 132.3 s                    |
| 8   |                                      | 52.1 s                     |
| 8a  |                                      | 132.2 s                    |
| 9   | 5.11 (s)                             | 78.9 d                     |
| 11  | 4.18 (d, 9.0)                        | 65.5 d                     |
| 12  | 6.08 (br.d, 7.7)                     | 113.2 d                    |
| 12a |                                      | 136.5 s                    |
| 13  | 6.88 (t, 7.7)                        | 128.8 d                    |
| 14  | 5.95 (br.d, 7.7)                     | 101.8 d                    |
| 14a |                                      | 150.5 s                    |
| 15a | 2.85 (s)                             | 29.6 q                     |
| 17A | 3.87 (dd, 12.1, 8.4)                 | 44.2 t                     |
| 17B | 3.07 (m)                             |                            |
| 18A | 2.72 (m)                             | 30.4 t                     |
| 18B | 2.00 (dd, 13.1, 6.9)                 |                            |
| 19A | 2.37 (m)                             | 37.8 t                     |
| 19B | 2.27 (dt, 12.8, 9.1)                 |                            |
| 20A | 3.47 (m)                             | 36.0 t                     |
| 20B | 3.41 (dd, 15.5, 8.2)                 |                            |
| 21  | 2.90 (d, 9.0)                        | 63.9 d                     |
| 22  |                                      | 59.7 s                     |
| 23  | 1.65 (s)                             | 24.9 q                     |
| 24  | 1.42 (s)                             | 20.5 q                     |
| 1'  |                                      | 168.4 s                    |
| 2'  | 6.55 (d, 15.0)                       | 121.2 d                    |
| 3'  | 7.31 (dd, 15.0, 10.6)                | 141.8 d                    |
| 4'  | 6.19 (m)                             | 130.7 d                    |
| 5'  | 6.11 (m)                             | 137.1 d                    |
| 6'  | 1.85 (d, 6.5)                        | 18.7 q                     |

**Table S5.**  $^1\text{H}$  NMR (500 MHz) and  $^{13}\text{C}$  NMR (125 MHz) spectroscopic data of communesin C (**3**) in  $\text{CD}_3\text{OD}$ .

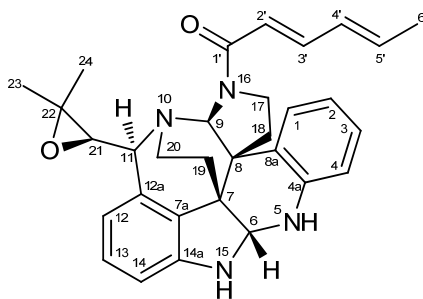

| no. | $\delta_{\text{H}}$ (mult, $J$ (Hz)) | $\delta_{\text{C}}$ (mult) |
|-----|--------------------------------------|----------------------------|
| 1   | 6.59–6.66 (m)                        | 123.8 d                    |
| 2   | 6.59–6.66 (m)                        | 120.4 d                    |
| 3   | 6.95 (m)                             | 128.3 d                    |
| 4   | 6.71 (br.d, 7.7)                     | 117.9 d                    |
| 4a  |                                      | 145.1 s                    |
| 6   | 4.92 (s)                             | 80.8 d                     |
| 7   |                                      | 53.0 s                     |
| 7a  |                                      | 134.0 s                    |
| 8   |                                      | 53.2 s                     |
| 8a  |                                      | 132.6 s                    |
| 9   | 5.23 (s)                             | 78.2 d                     |
| 11  | 4.26 (d, 9.0)                        | 66.8 d                     |
| 12  | 6.13–6.21 (m)                        | 115.5 d                    |
| 12a |                                      | 137.9 s                    |
| 13  | 6.79 (t, 7.7)                        | 129.7 d                    |
| 14  | 6.13–6.21 (m)                        | 106.8 d                    |
| 14a |                                      | 151.8 s                    |
| 17A | 3.85 (dd, 11.9, 8.1)                 | 45.5 t                     |
| 17B | 2.99 (m)                             |                            |
| 18A | 2.83 (m)                             | 31.3 t                     |
| 18B | 1.95 (dd, 13.1, 7.1)                 |                            |
| 19A | 2.41 (m)                             | 38.8 t                     |
| 19B | 2.26 (m)                             |                            |
| 20A | 3.45 (m)                             | 37.0 t                     |
| 20B | 3.35 (m)                             |                            |
| 21  | 2.95 (d, 9.0)                        | 65.6 d                     |
| 22  |                                      | 61.6 s                     |
| 23  | 1.66 (s)                             | 25.0 q                     |
| 24  | 1.40 (s)                             | 20.7 q                     |
| 1'  |                                      | 170.6 s                    |
| 2'  | 6.59–6.66 (m)                        | 122.4 d                    |
| 3'  | 7.21 (dd, 15.0, 10.4)                | 143.1 d                    |
| 4'  | 6.28 (m)                             | 131.9 d                    |
| 5'  | 6.13–6.21 (m)                        | 138.8 d                    |
| 6'  | 1.86 (d, 6.8)                        | 18.8 q                     |

**Table S6.**  $^1\text{H}$  NMR (500 MHz) and  $^{13}\text{C}$  NMR (125 MHz) spectroscopic data of communesin F (6) in  $\text{CDCl}_3$ .

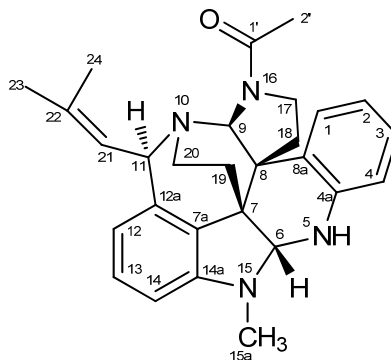

| no. | $\delta_{\text{H}}$ (mult, $J$ (Hz)) | $\delta_{\text{C}}$ (mult) |
|-----|--------------------------------------|----------------------------|
| 1   | 6.65–6.75 (m)                        | 123.2 d                    |
| 2   | 6.65–6.75 (m)                        | 120.6 d                    |
| 3   | 7.00 (dt, 7.5, 1.0)                  | 127.3 d                    |
| 4   | 6.65–6.75 (m)                        | 117.0 d                    |
| 4a  |                                      | 142.7 s                    |
| 6   | 4.66 (s)                             | 82.6 d                     |
| 7   |                                      | 51.2 s                     |
| 7a  |                                      | 132.7 s                    |
| 8   |                                      | 51.8 s                     |
| 8a  |                                      | 131.3 s                    |
| 9   | 5.30 (s)                             | 79.6 d                     |
| 11  | 5.05 (d, 8.7)                        | 64.4 d                     |
| 12  | 6.08 (d, 7.6)                        | 114.7 d                    |
| 12a |                                      | 140.6 s                    |
| 13  | 6.82 (t, 7.7)                        | 128.4 d                    |
| 14  | 5.86 (d, 7.6)                        | 100.8 d                    |
| 14a |                                      | 150.1 s                    |
| 15a | 2.82 (s)                             | 29.7 q                     |
| 17A | 3.85 (dd, 11.6, 8.9)                 | 44.2 t                     |
| 17B | 3.03 (m)                             |                            |
| 18A | 2.74 (m)                             | 30.9 t                     |
| 18B | 1.97 (m)                             |                            |
| 19A | 2.29 (m)                             | 37.8 t                     |
| 19B | 2.21 (m)                             |                            |
| 20A | 3.34 (br.dd, 14.2, 10.0)             | 36.3 t                     |
| 20B | 3.14 (m)                             |                            |
| 21  | 5.23 (br.d, 8.7)                     | 124.6 d                    |
| 22  |                                      | 136.1 s                    |
| 23  | 1.79 (s)                             | 26.0 q                     |
| 24  | 1.85 (s)                             | 18.5 q                     |
| 1'  |                                      | 171.6 s                    |
| 2'  | 2.41 (s)                             | 22.7 q                     |

**Table S7.**  $^1\text{H}$  NMR (500 MHz) and  $^{13}\text{C}$  NMR (125 MHz) spectroscopic data of (–)-aurantioclavine (**10**) in  $\text{CDCl}_3$ .

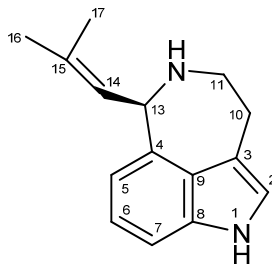

| no. | $\delta_{\text{H}}$ (mult, $J$ (Hz)) | $\delta_{\text{C}}$ (mult) |
|-----|--------------------------------------|----------------------------|
| 2   | 7.02 (br.d, 1.4)                     | 127.8 d                    |
| 3   |                                      | 115.8 s                    |
| 4   |                                      | 137.1 s                    |
| 5   | 7.23 (d, 8.1)                        | 120.9 d                    |
| 6   | 7.10 (t, 7.7)                        | 121.5 d                    |
| 7   | 6.84 (dt, 7.3, 0.9)                  | 109.1 d                    |
| 8   |                                      | 138.6 s                    |
| 9   |                                      | 133.2 s                    |
| 10  | 2.96–3.16 (m)                        | 31.0 t                     |
| 11a | 3.56 (m)                             | 48.9 t                     |
| 11b | 2.96–3.16 (m)                        |                            |
| 13  | 4.89 (d, 9.0)                        | 62.6 d                     |
| 14  | 5.47 (br.d, 9.0)                     | 117.8 d                    |
| 15  |                                      | 125.4 s                    |
| 16  | 1.84 (d, 1.2)                        | 25.8 q                     |
| 17  | 1.85 (d, 1.2)                        | 18.3 q                     |



**Table S8.**  $^1\text{H}$  NMR (500 MHz) spectroscopic data of 4-L-DMAT (**11**) in  $\text{CDCl}_3$ .

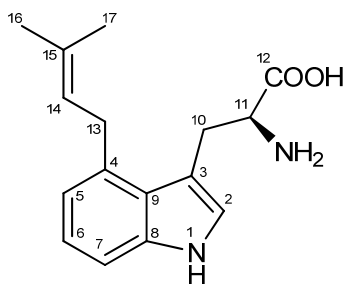

| no. | $\delta_{\text{H}}$ (mult, $J$ (Hz)) |
|-----|--------------------------------------|
| 1   | —                                    |
| 2   | 7.16 (s)                             |
| 3   | —                                    |
| 4   | —                                    |
| 5   | 7.19 (d, 8.0)                        |
| 6   | 7.00 (t, 7.9)                        |
| 7   | 6.78 (d, 7.2)                        |
| 8   | —                                    |
| 9   | —                                    |
| 10  | 3.11–3.86 (m)                        |
| 11  | 3.11–3.86 (m)                        |
| 12  | —                                    |
| 13  | 3.11–3.86 (m)                        |
| 14  | 5.33 (m)                             |
| 15  | —                                    |
| 16  | 1.77 (br.s)                          |
| 17  | 1.75 (br.s)                          |

**Table S9.**  $^1\text{H}$  NMR (500 MHz) and  $^{13}\text{C}$  NMR (125 MHz) spectroscopic data of communesin I (**12**) in  $\text{CDCl}_3$ .

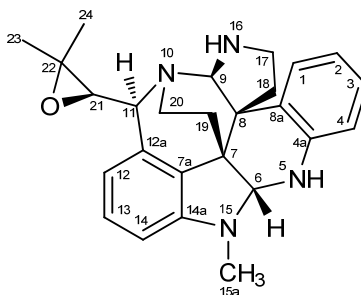

| no. | $\delta_{\text{H}}$ (mult, $J$ (Hz)) | $\delta_{\text{C}}$ (mult) |
|-----|--------------------------------------|----------------------------|
| 1   | 6.68 (dt, 8.8, 7.5, 1.2)             | 123.9 d                    |
| 2   | 6.60 (dd, 7.5, 1.2)                  | 119.8 d                    |
| 3   | 6.96–6.92 (m)                        | 126.8 d                    |
| 4   | 6.96–6.92 (m)                        | 116.3 d                    |
| 4a  |                                      | 143.5 s                    |
| 6   | 4.65 (s)                             | 82.2 d                     |
| 7   |                                      | 51.3 s                     |
| 7a  |                                      | 134.2 s                    |
| 8   |                                      | 51.5 s                     |
| 8a  |                                      | 132.9 s                    |
| 9   | 4.88 (s)                             | 80.1 d                     |
| 11  | 4.03 (d, 8.8)                        | 65.2 d                     |
| 12  | 6.02 (d, 7.8)                        | 113.7 d                    |
| 12a |                                      | 136.7 s                    |
| 13  | 6.84 (t, 7.8)                        | 128.6 d                    |
| 14  | 5.96 (d, 7.8)                        | 102.2 d                    |
| 15  | 2.86 (s)                             | 29.8 d                     |
| 14a |                                      | 150.4 s                    |
| 17a | 3.62 (ddd, 15.0, 9.2, 6.5)           | 44 t                       |
| 17b | 2.72–2.62 (m)                        |                            |
| 18a | 2.72–2.62 (m)                        | 34.6 t                     |
| 18b | 1.83–1.78 (m)                        |                            |
| 19a | 2.41–2.36 (ddd, 12.7, 9.2, 3.3)      | 35.5 t                     |
| 19b | 2.18–2.12 (m)                        |                            |
| 20a | 3.32–3.26 (m)                        | 35.8 t                     |
| 20b | 3.19–3.14 (m)                        |                            |
| 21  | 2.90 (d, 8.8)                        | 64.8 d                     |
| 22  |                                      | 60.2 s                     |
| 23  | 1.34 (s)                             | 25.1 q                     |
| 24  | 1.51 (s)                             | 20.2 q                     |

**Table S10.**  $^1\text{H}$  NMR (500 MHz),  $^{13}\text{C}$  NMR (125 MHz), and 2D-NMR spectroscopic data of communesin J (**13**) in  $\text{CDCl}_3$ .

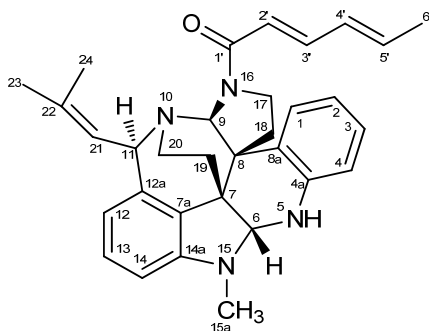

| no. | $\delta_{\text{H}}$ (mult, $J$ (Hz)) | $\delta_{\text{C}}$ (mult) | COSY                 | HMBC                                    |
|-----|--------------------------------------|----------------------------|----------------------|-----------------------------------------|
| 1   | 6.68–6.65 (m)                        | 123.5                      |                      | 127.4, 52.1                             |
| 2   | 6.68–6.65 (m)                        | 120.8                      | 6.99                 | 131.5, 117                              |
| 3   | 6.99 (ddd, 7.6, 5.3, 2.3)            | 127.4                      | 6.68–6.65            | 142.8, 123.5                            |
| 4   | 6.68–6.65 (m)                        | 117                        | 6.99                 | 120.8                                   |
| 4a  |                                      | 142.8                      |                      |                                         |
| 6   | 4.67 (s)                             | 82.8                       |                      | 150.2, 142.8, 131.5, 52.1, 37.9, 36.3   |
| 7   |                                      | 51.3                       |                      |                                         |
| 7a  |                                      | 132.8                      |                      |                                         |
| 8   |                                      | 52.1                       |                      |                                         |
| 8a  |                                      | 131.5                      |                      |                                         |
| 9   | 5.21 (m)                             | 78.6                       |                      | 132.8, 64.5, 51.3, 44.6, 36.3           |
| 11  | 5.15 (m)                             | 64.5                       | 5.22                 | 140.8, 136.5, 132.8, 124.9, 114.8, 26.1 |
| 12  | 6.11 (d, 7.5)                        | 114.8                      | 6.83                 | 132.8, 100.9, 64.5                      |
| 12a |                                      | 140.8                      |                      |                                         |
| 13  | 6.83 (t, 7.5)                        | 128.5                      | 6.11, 5.87           | 150.2, 140.8, 100.9                     |
| 14  | 5.87 (d, 7.5)                        | 100.9                      | 6.83                 | 132.8, 114.8                            |
| 14a |                                      | 150.2                      |                      |                                         |
| 15a | 2.82 (s)                             | 30.8                       |                      | 150.2, 82.8                             |
| 17a | 3.90 (dd, 12.1, 8.2)                 | 44.6                       | 2.75, 1.99           | 51.3                                    |
| 17b | 3.09 (dd, 12.1, 8.2)                 |                            |                      |                                         |
| 18a | 2.75 (td, 8.8, 11.6, 13.1)           | 29.9                       | 3.90, 3.09           | 132.8, 30.5                             |
| 18b | 1.99 (dd, 8.0, 13.1)                 |                            |                      |                                         |
| 19a | 2.31–2.25 (m)                        | 37.9                       | 3.35, 3.22–3.14      | 132.8, 82.8, 51.3                       |
| 19b | 2.24–2.21 (m)                        |                            |                      |                                         |
| 20a | 3.35 (dd, 15.8, 9.3), 3.22–3.14 (m)  | 36.3                       | 2.31–2.25, 2.24–2.21 | 78.6, 64.5                              |
| 20b |                                      |                            |                      |                                         |
| 21  | 5.22 (m)                             | 124.9                      | 5.15                 |                                         |
| 22  |                                      | 136.5                      |                      |                                         |
| 23  | 1.79 (d, 1.0)                        | 26.1                       |                      | 136.5, 124.9                            |
| 24  | 1.94 (d, 1.0)                        | 18.8                       |                      | 136.5, 124.9, 18.8                      |
| 1'  |                                      | 167.6                      |                      |                                         |
| 2'  | 6.50 (d, 15.0)                       | 120.5                      | 7.39                 | 167.6, 130.4                            |
| 3'  | 7.39 (dd, 15.0, 11.0)                | 142.3                      | 6.5, 6.26            | 167.6, 137.9                            |
| 4'  | 6.26 (dd, 13.0, 10.8)                | 130.4                      | 7.39, 6.15           | 137.9, 18.8                             |
| 5'  | 6.15 (dq, 6.5, 13.0)                 | 137.9                      | 6.26, 1.86           | 142.3, 130.4, 18.8                      |
| 6'  | 1.86 (d, 6.5)                        | 18.8                       | 6.15                 | 137.9, 130.4                            |

**Table S11.**  $^1\text{H}$  NMR (500 MHz),  $^{13}\text{C}$  NMR (125 MHz), and 2D-NMR spectroscopic data of communesin K (**14**) in  $\text{CD}_3\text{OD}$ .

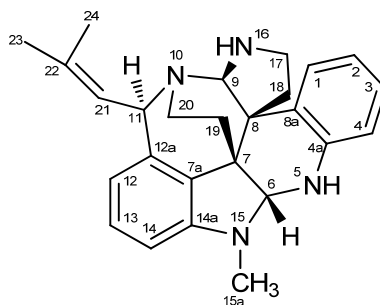

| no. | $\delta_{\text{H}}$ (mult, $J$ (Hz)) | $\delta_{\text{C}}$ (mult) | HMBC                                |
|-----|--------------------------------------|----------------------------|-------------------------------------|
| 1   | 6.87 (m)                             | 124.0 d                    | 145.5, 129.1, 52.2                  |
| 2   | 6.72 (m)                             | 120.9 d                    | 132.4, 118.9                        |
| 3   | 7.04 (m)                             | 129.1 d                    | 124.0, 145.5                        |
| 4   | 6.84 (br.d, 7.8)                     | 118.8 d                    | 132.4, 121.0                        |
| 4a  |                                      | 145.5 s                    |                                     |
| 6   | 4.68 (s)                             | 83.2 d                     | 152.0, 145.5, 131.7, 52.2, 36.7     |
| 7   |                                      | 52.2 s                     |                                     |
| 7a  |                                      | 131.7 s                    |                                     |
| 8   |                                      | 52.2 s                     |                                     |
| 8a  |                                      | 132.4 s                    |                                     |
| 9   | 5.46 (s)                             | 83.2 d                     | 132.4, 36.6, 34.0, 66.8, 52.2, 44.3 |
| 11  | 5.23 (m)                             | 66.8 d                     | 124.8, 36.5, 18.7                   |
| 12  | 6.02 (d, 7.8)                        | 115.3 d                    | 131.7, 102.3, 66.8                  |
| 12a |                                      | 139.4 s                    |                                     |
| 13  | 6.78 (t, 7.8)                        | 130.0 d                    | 152.0, 139.4                        |
| 14  | 5.87 (d, 7.8)                        | 102.3 d                    | 131.7, 115.3                        |
| 14a |                                      | 152.0 s                    |                                     |
| 15a | 2.80 (s)                             | 29.9 q                     | 152.0, 83.2                         |
| 17  | 3.36 (m)                             | 44.2 t                     | 83.2, 52.2                          |
| 17b | 2.74 (m)                             |                            |                                     |
| 18a | 2.81 (m)                             | 34.0 t                     | 132.4, 83.2                         |
| 18b | 2.17 (m)                             |                            |                                     |
| 19a | 2.39 (m)                             | 36.5 t                     | 131.7, 83.2, 52.2                   |
| 19b | 2.22 (m)                             |                            | 52.2                                |
| 20a | 3.49 (m)                             | 36.5 t                     | 83.2                                |
| 20b | 3.26 (m)                             |                            | 145.5, 66.8                         |
| 21  | 5.23 (m)                             | 124.8 d                    |                                     |
| 22  |                                      |                            |                                     |
| 23  | 1.81 (br.s)                          | 25.9 q                     | 140.6, 124.7, 18.7                  |
| 24  | 1.88 (br.s)                          | 18.7 q                     | 140.6, 124.7, 26.0                  |

Supplementary Figures

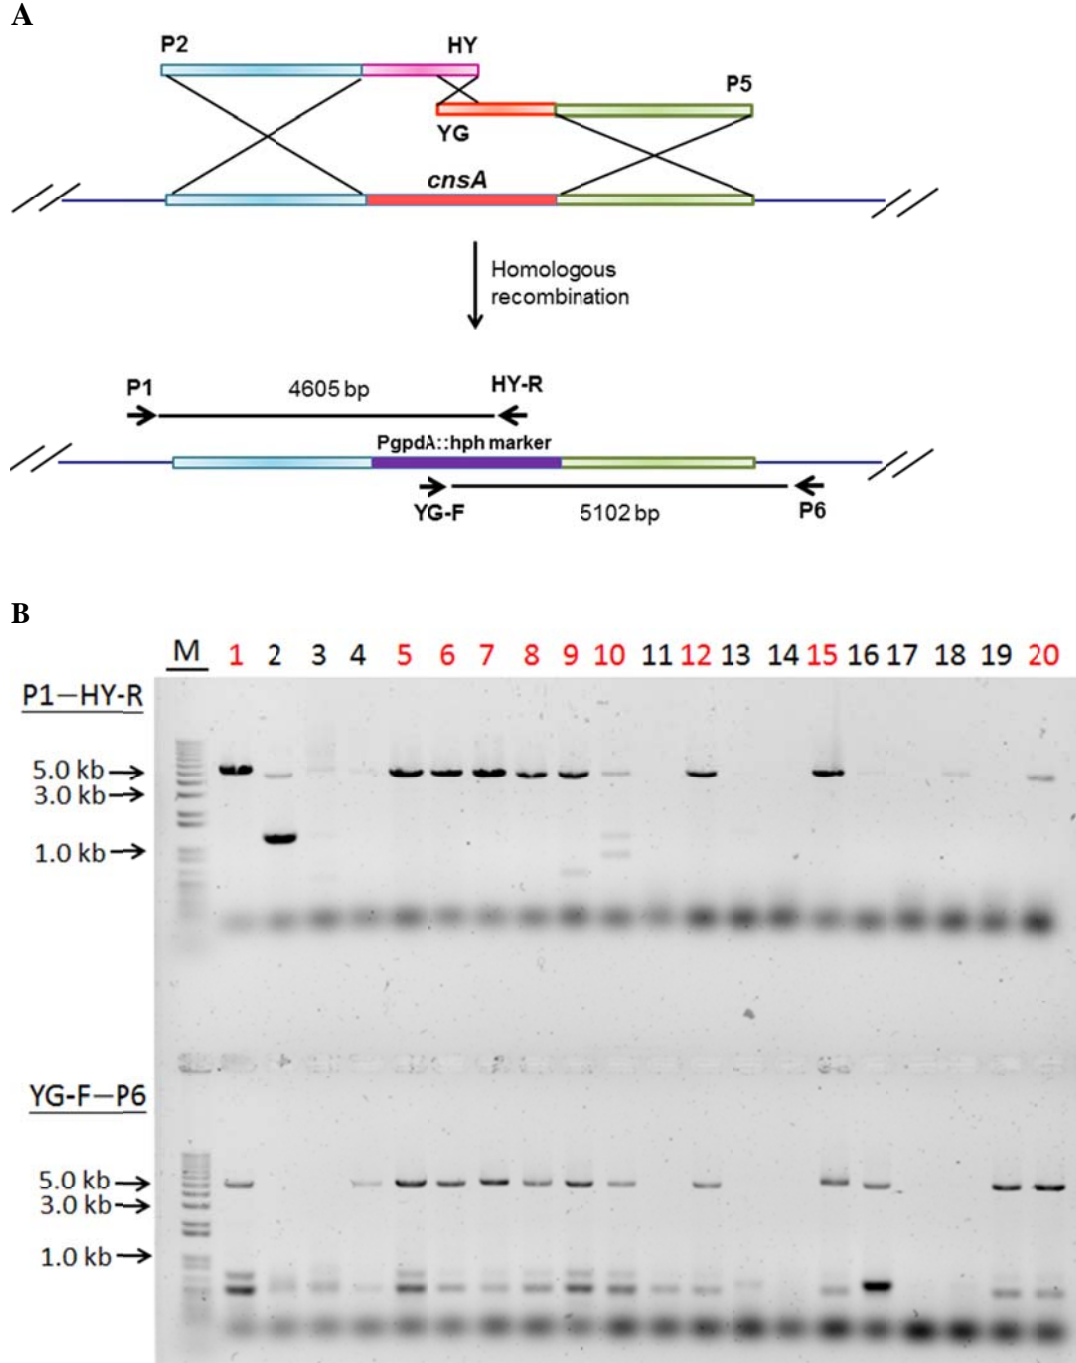

**Figure S1.** (A) Targeted deletion of *cnsA* with knockout cassette with split marker (B) PCR screening using primer pairs of P1 and HY-R, YG-F and P6. Colony number shown in red indicates that it passed the screening by using both primer pairs

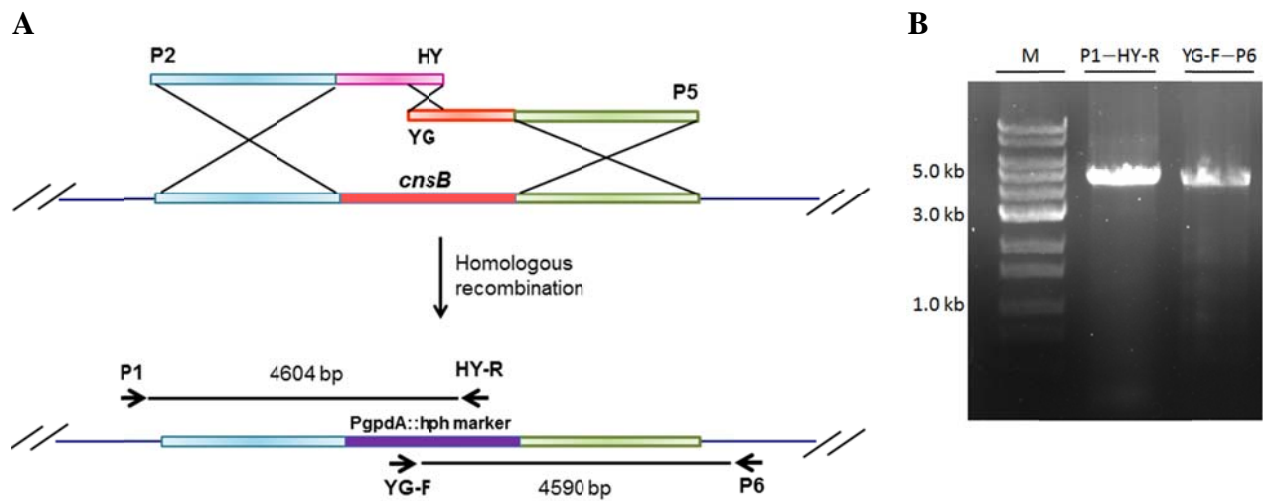

**Figure S2.** (A) Targeted deletion of *cnsB* with knockout cassette with split marker (B) PCR screening using primer pairs of P1 and HY-R, YG-F and P6.

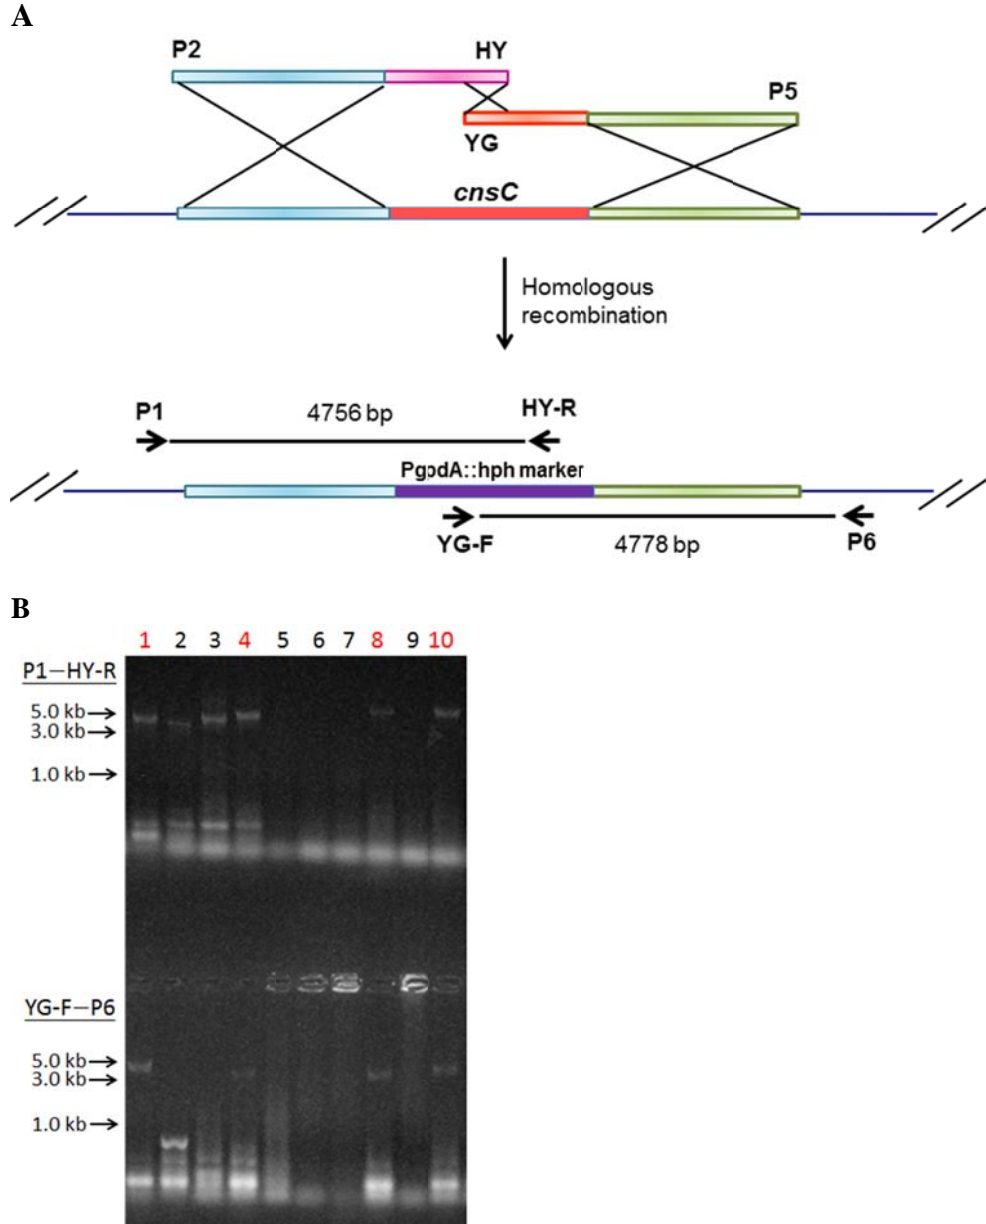

**Figure S3.** (A) Targeted deletion of *cnsC* with knockout cassette with split marker (B) PCR screening using primer pairs of P1 and HY-R, YG-F and P6. Colony number shown in red indicates that it passed the screening by using both primer pairs

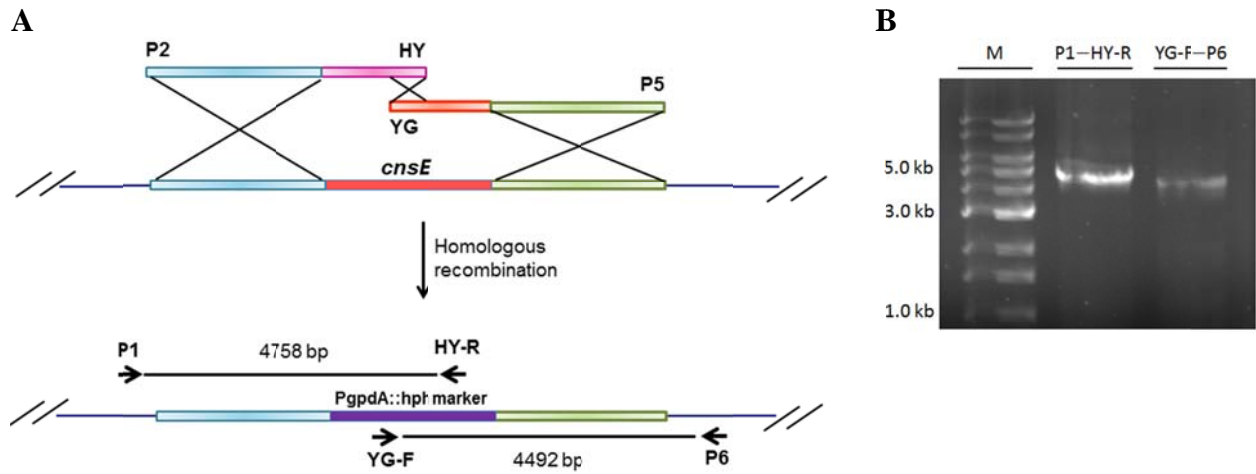

**Figure S4.** (A) Targeted deletion of *cnsE* with knockout cassette with split marker (B) PCR screening using primer pairs of P1 and HY-R, YG-F and P6.

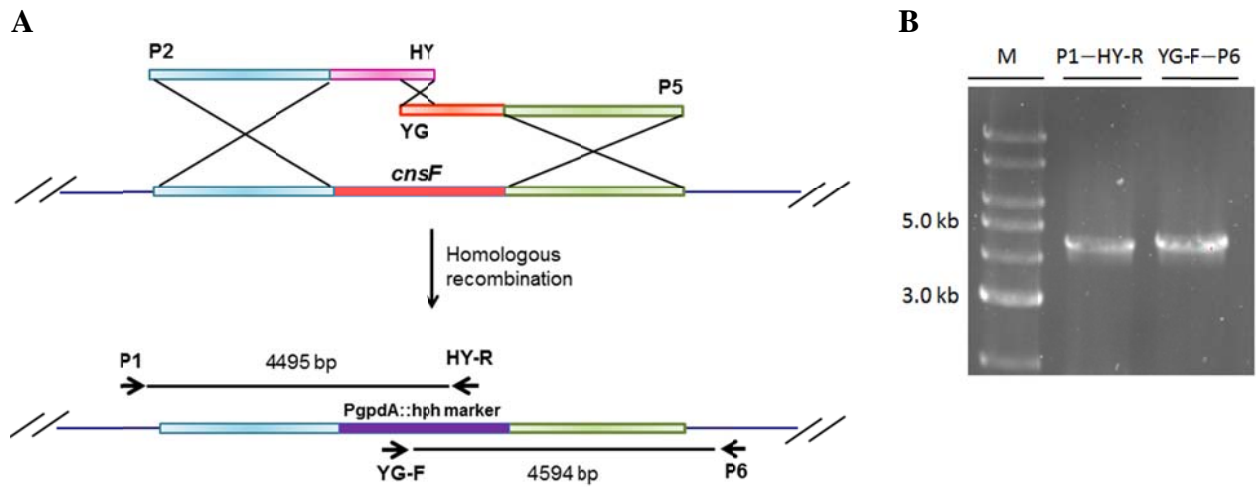

**Figure S5.** (A) Targeted deletion of *cnsF* with knockout cassette with split marker (B) PCR screening using primer pairs of P1 and HY-R, YG-F and P6.



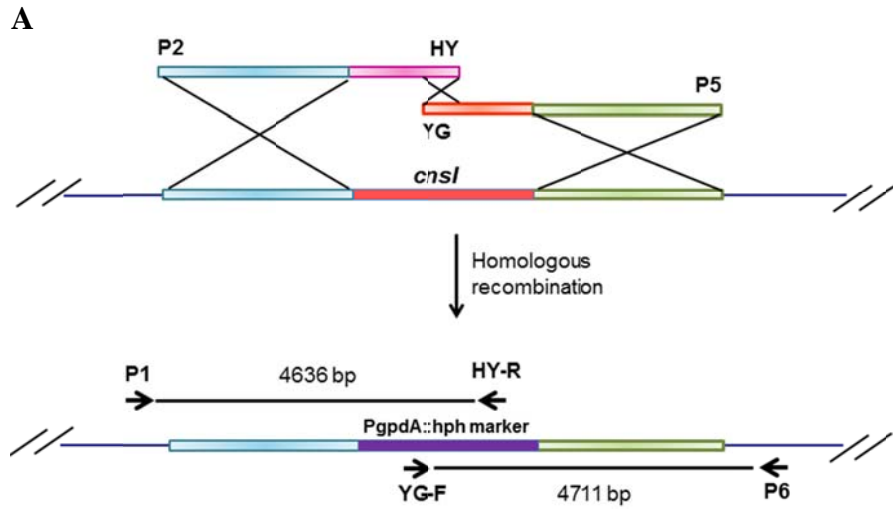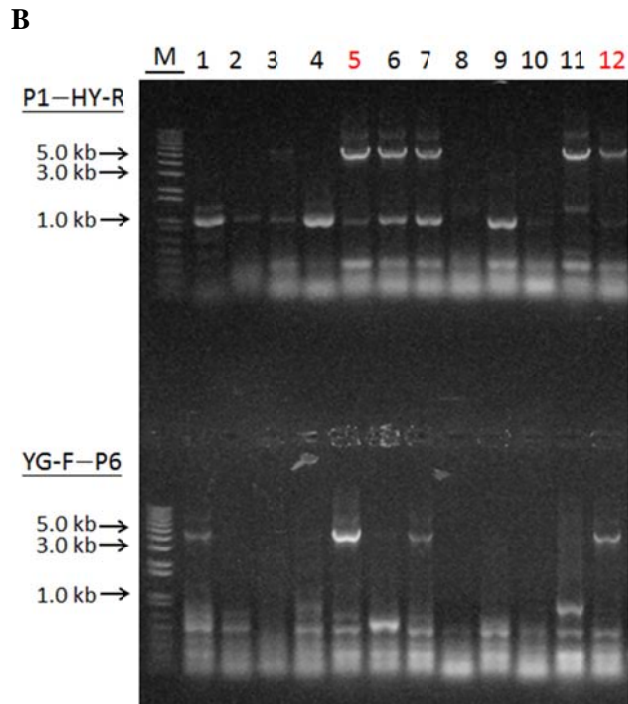

**Figure S6.** (A) Targeted deletion of *cnsI* with knockout cassette with split marker (B) PCR screening using primer pairs of P1 and HY-R, YG-F and P6. Colony number shown in red indicates that it passed the screening by using both primer pairs.

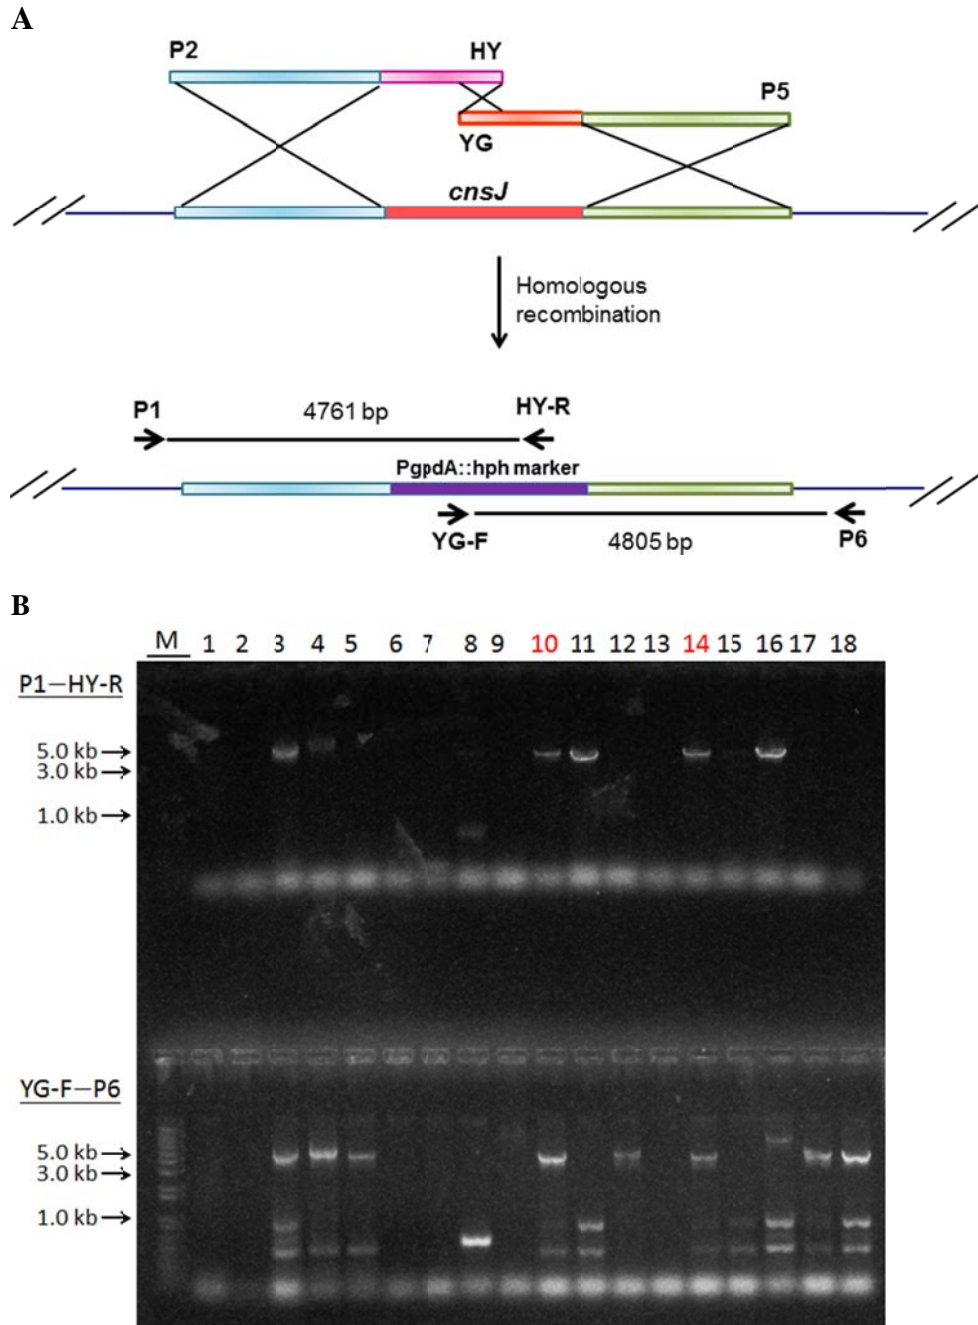

**Figure S7.** (A) Targeted deletion of *cnsJ* with knockout cassette with split marker (B) PCR screening using primer pairs of P1 and HY-R, YG-F and P6. Colony number shown in red indicates that it passed the screening by using both primer pairs.

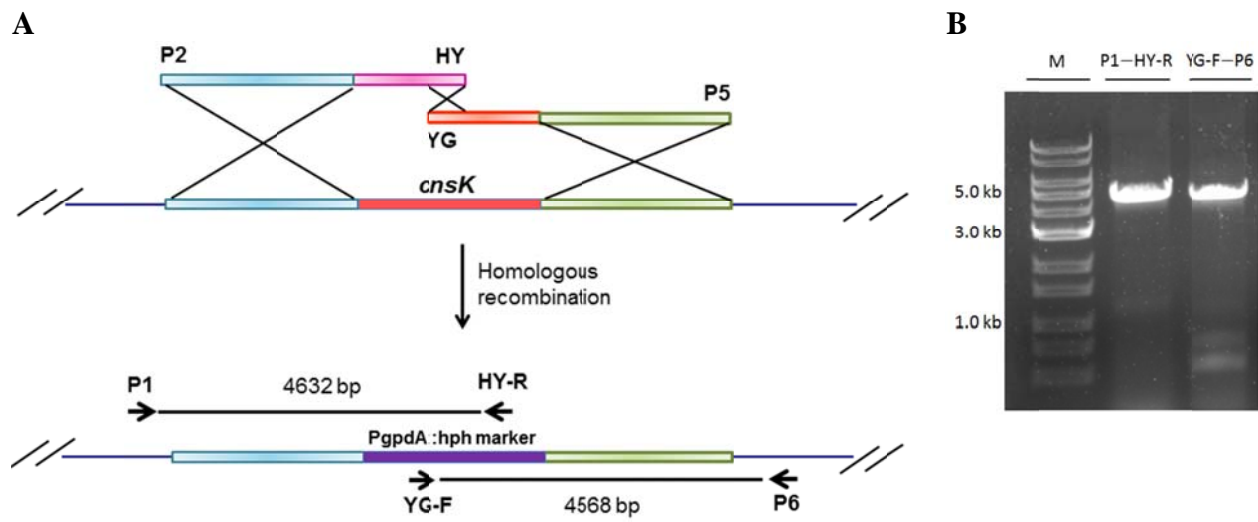

**Figure S8.** (A) Targeted deletion of *cnsK* with knockout cassette with split marker (B) PCR screening using primer pairs of P1 and HY-R, YG-F and P6.

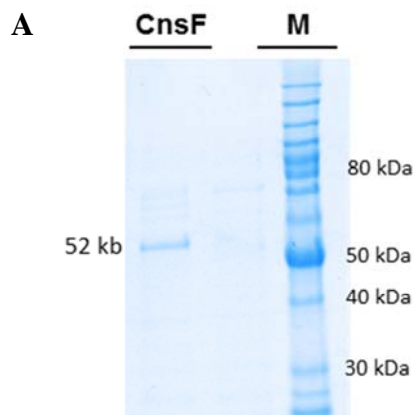

**Figure S9.** Recombinant CnsF purified from *E.coli* BL21 (DE3). SDS-PAGE analysis of purified CnsF (52 kDa).

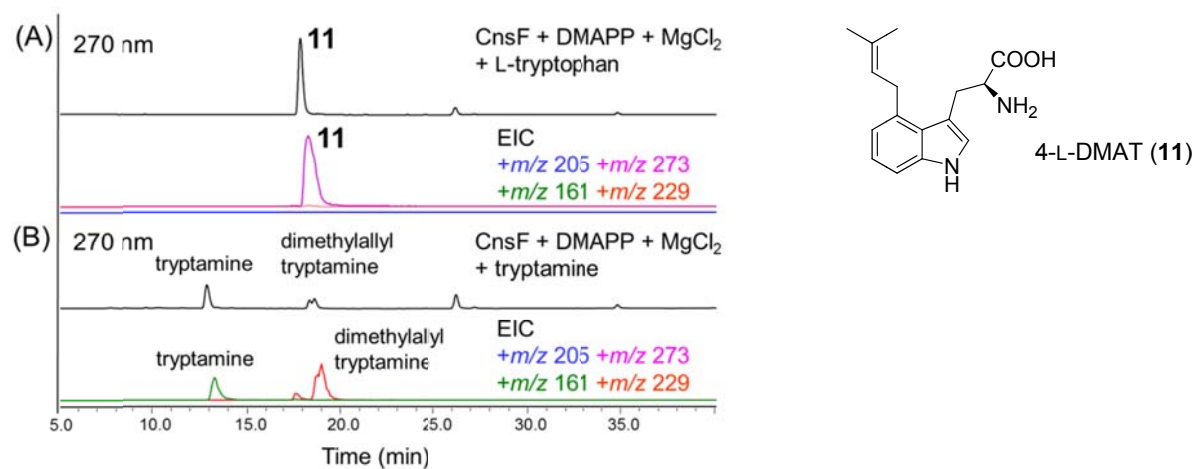

**Figure S10.** LC-MS analysis of in vitro assays of CnsF with (A) L-tryptophan and (B) tryptamine.

TCM-II-187-2

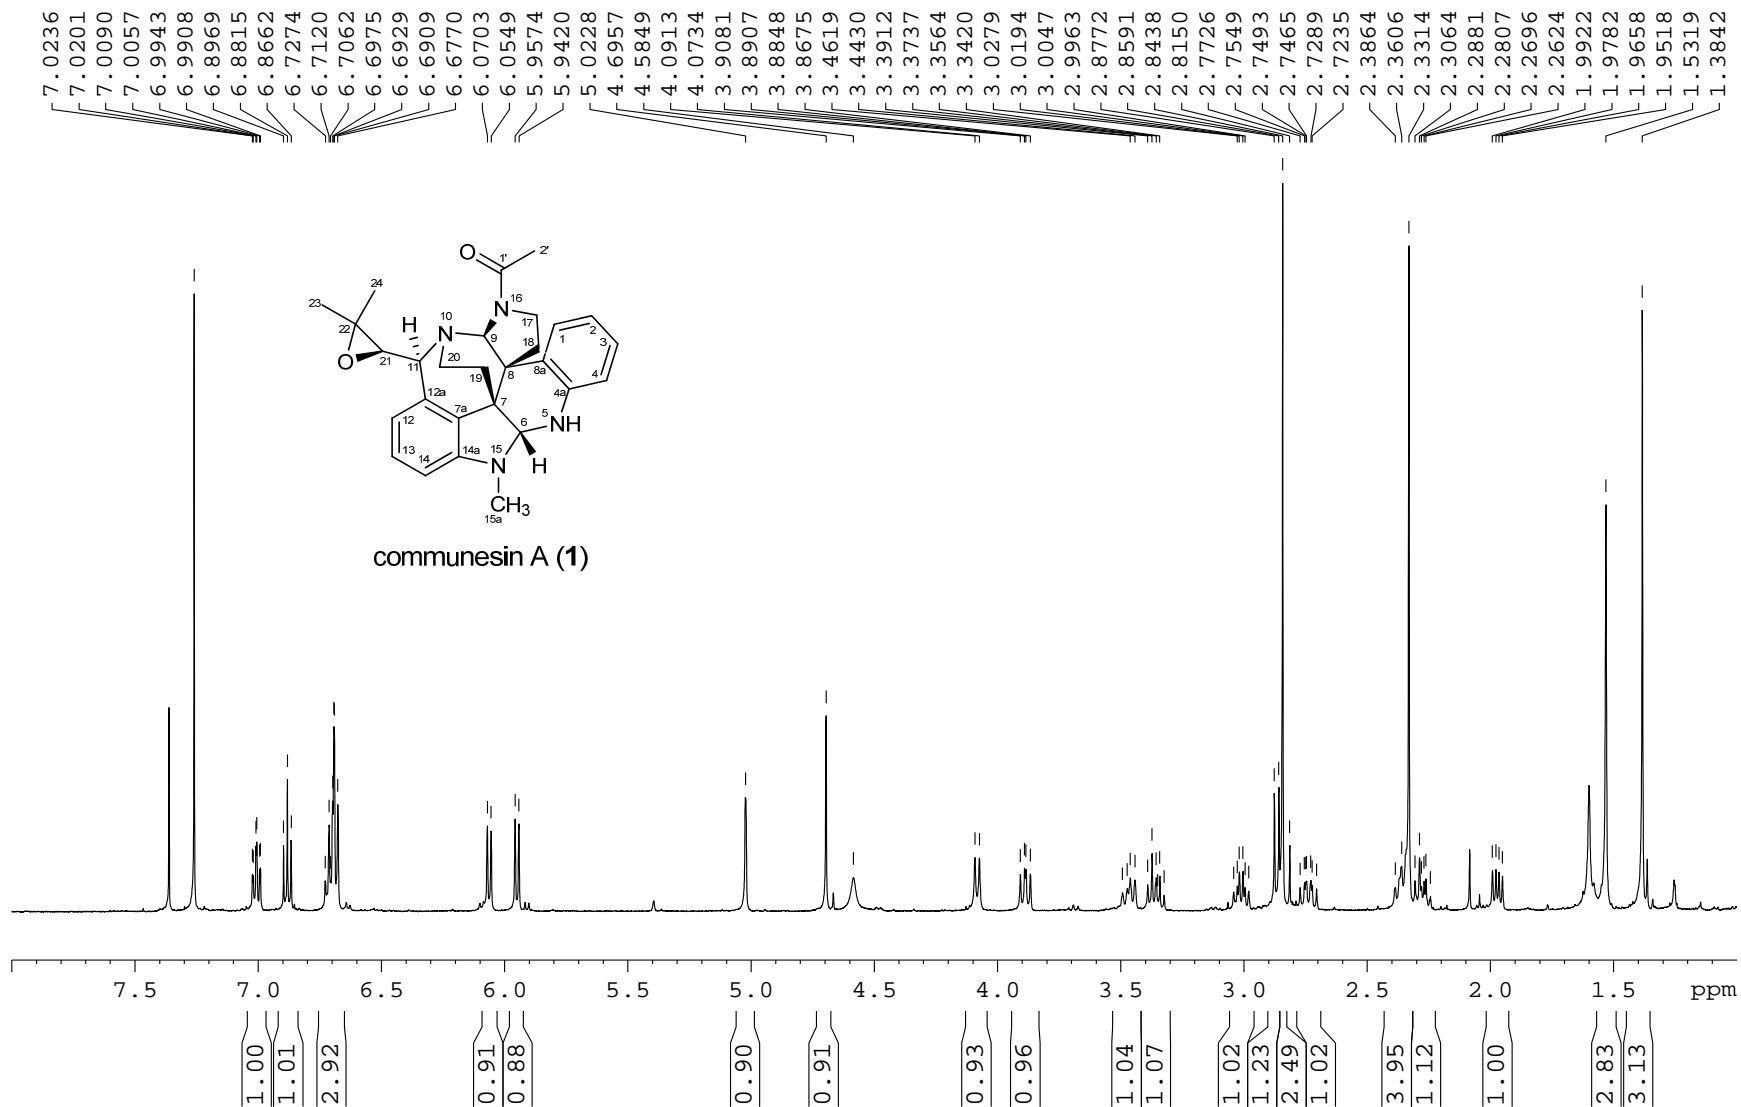

Figure S11. <sup>1</sup>H NMR spectrum of **1** (CDCl<sub>3</sub>, 500 MHz).

TCM-II-187C13, communesin A

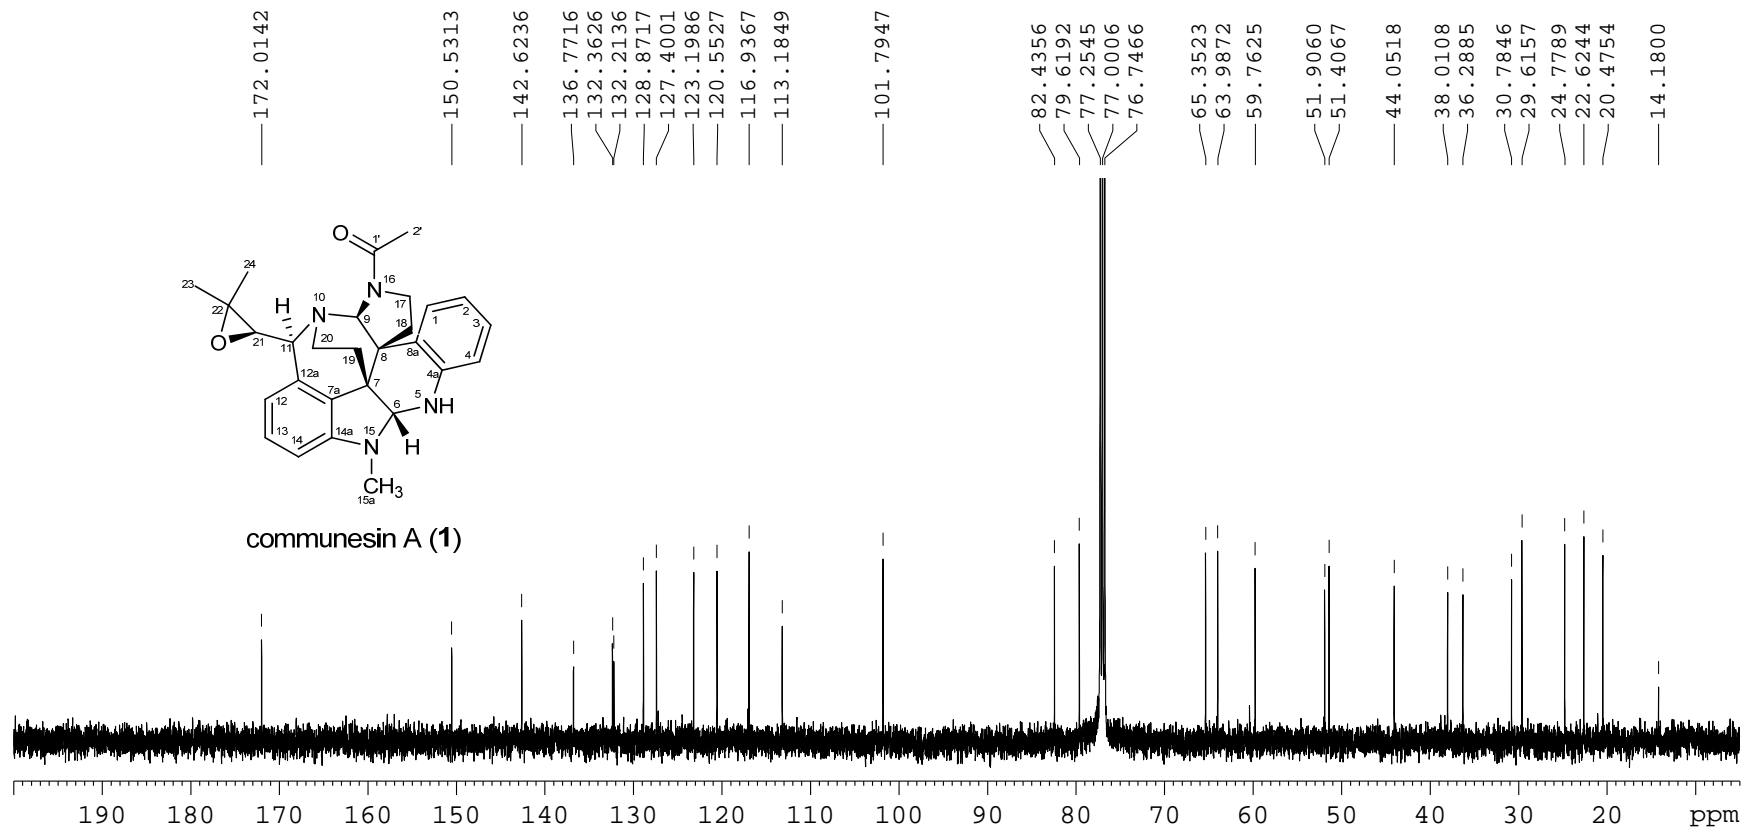

Figure S12.  $^{13}\text{C}$  NMR spectrum of **1** ( $\text{CDCl}_3$ , 125 MHz).

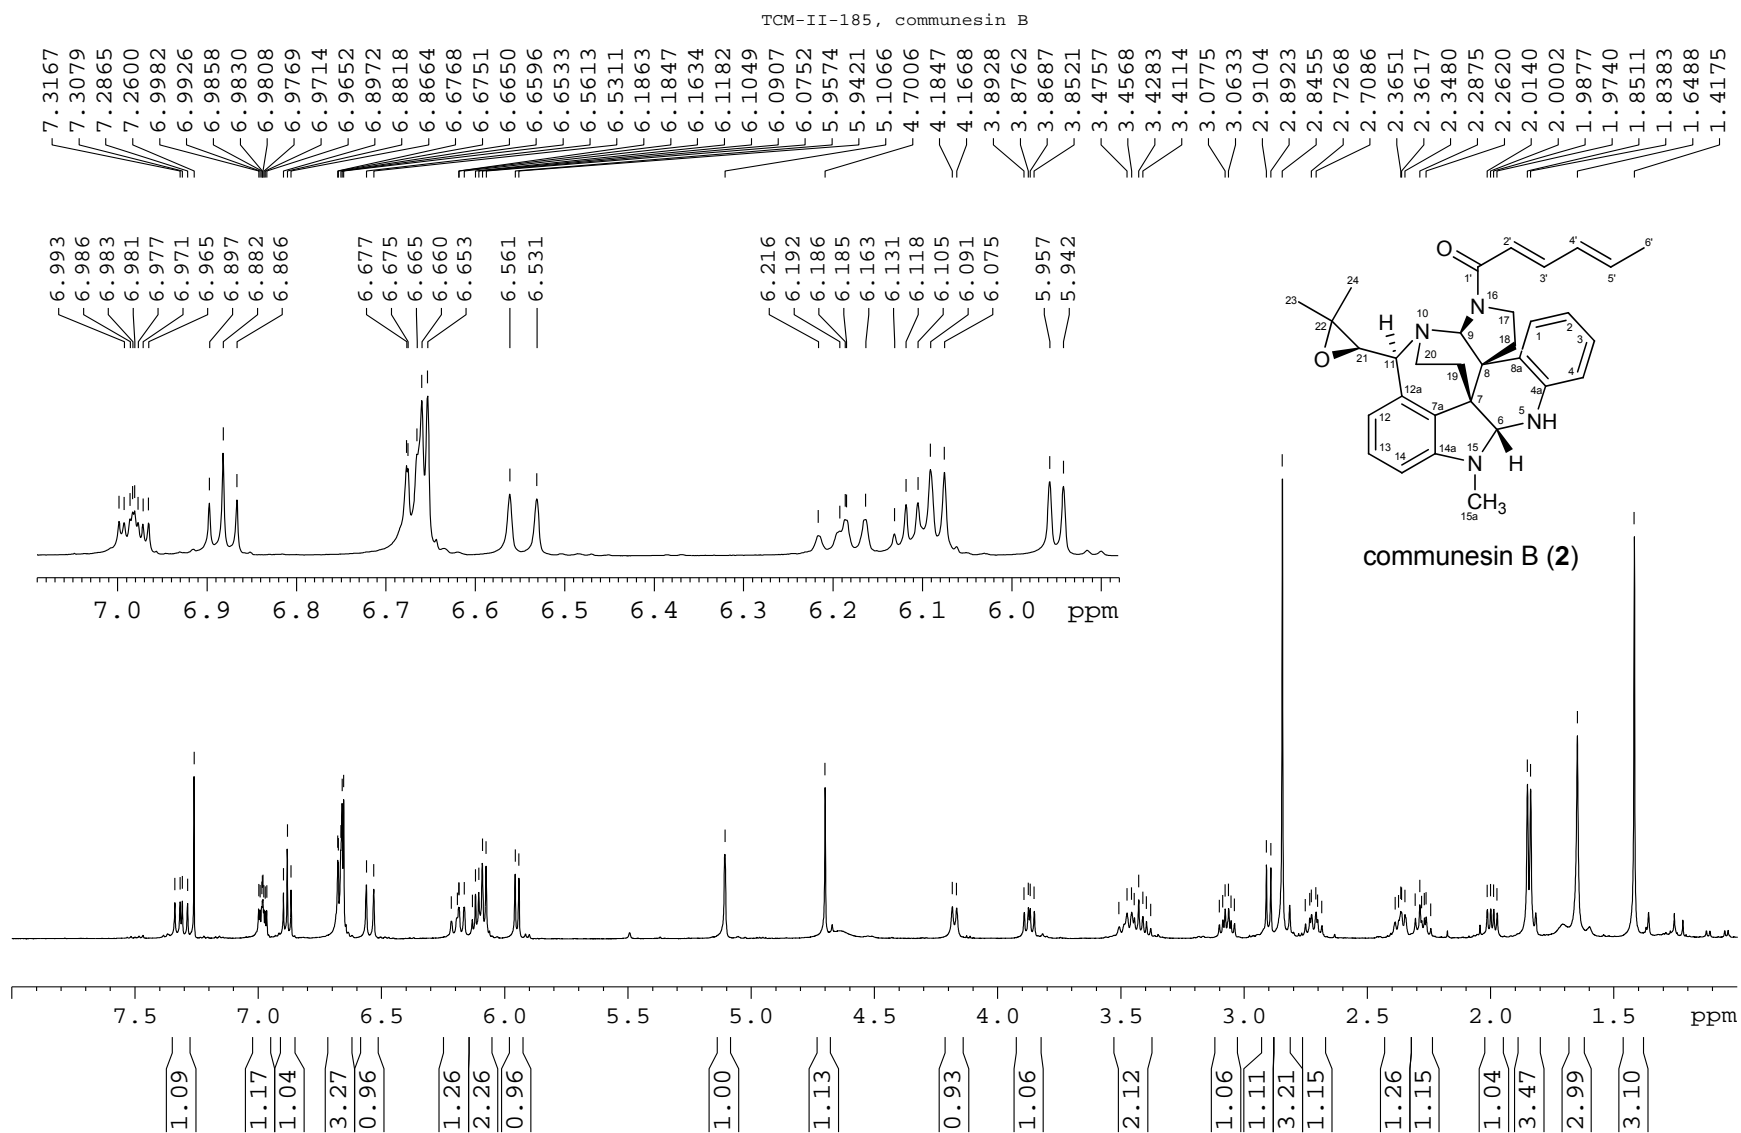

**Figure S13.**  $^1\text{H}$  NMR spectrum of **2** ( $\text{CDCl}_3$ , 500 MHz).

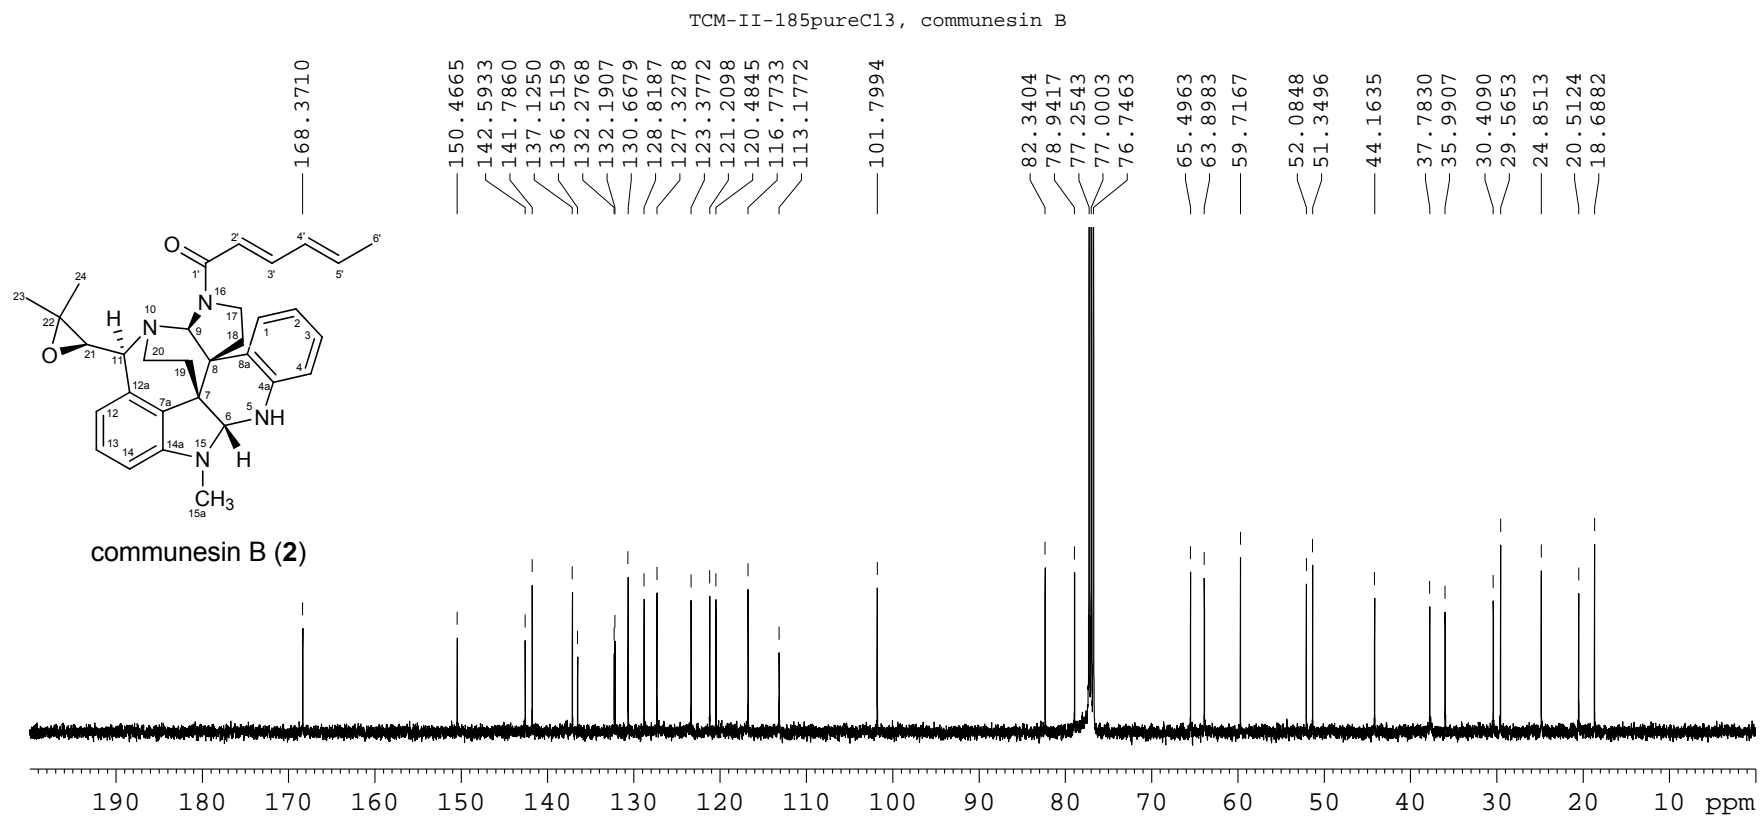

**Figure S14.**  $^{13}\text{C}$  NMR spectrum of **2** ( $\text{CDCl}_3$ , 125 MHz).



hcl-20140813 10, <sup>1</sup>H spectrum, mutant E21-EA-tube49-51-Sephadex LH-20 Fr.2, 1.2 mg, in CD<sub>3</sub>OD, AV500-cryo, 2014/08/18

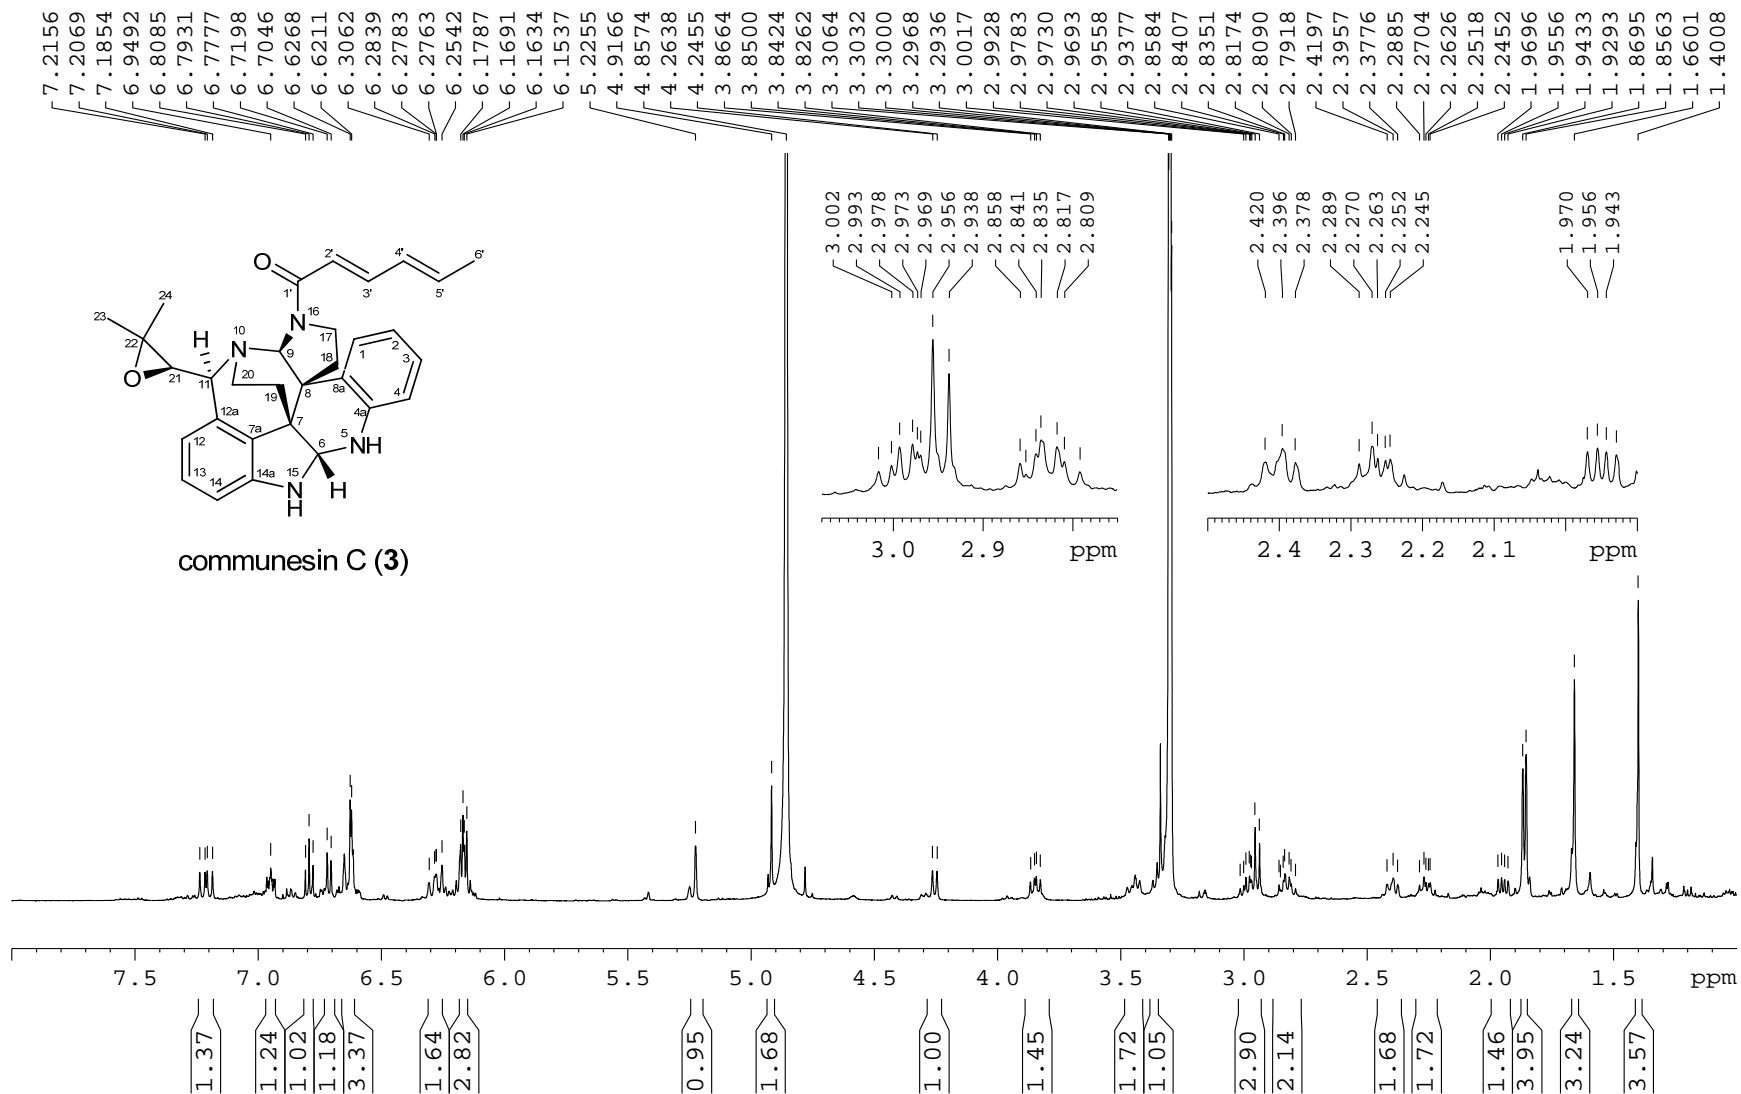

Figure S15. <sup>1</sup>H NMR spectrum of **3** (CDCl<sub>3</sub>, 500 MHz).

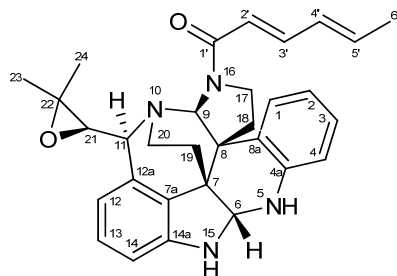

communesin C (**3**)

hcl-20140813 12, <sup>13</sup>C spectrum, mutant E21-EA-tube49-51-Sephadex LH-20 Fr.2, 1.2 mg, in CD<sub>3</sub>OD, AV500-cryo, 2014/08/18

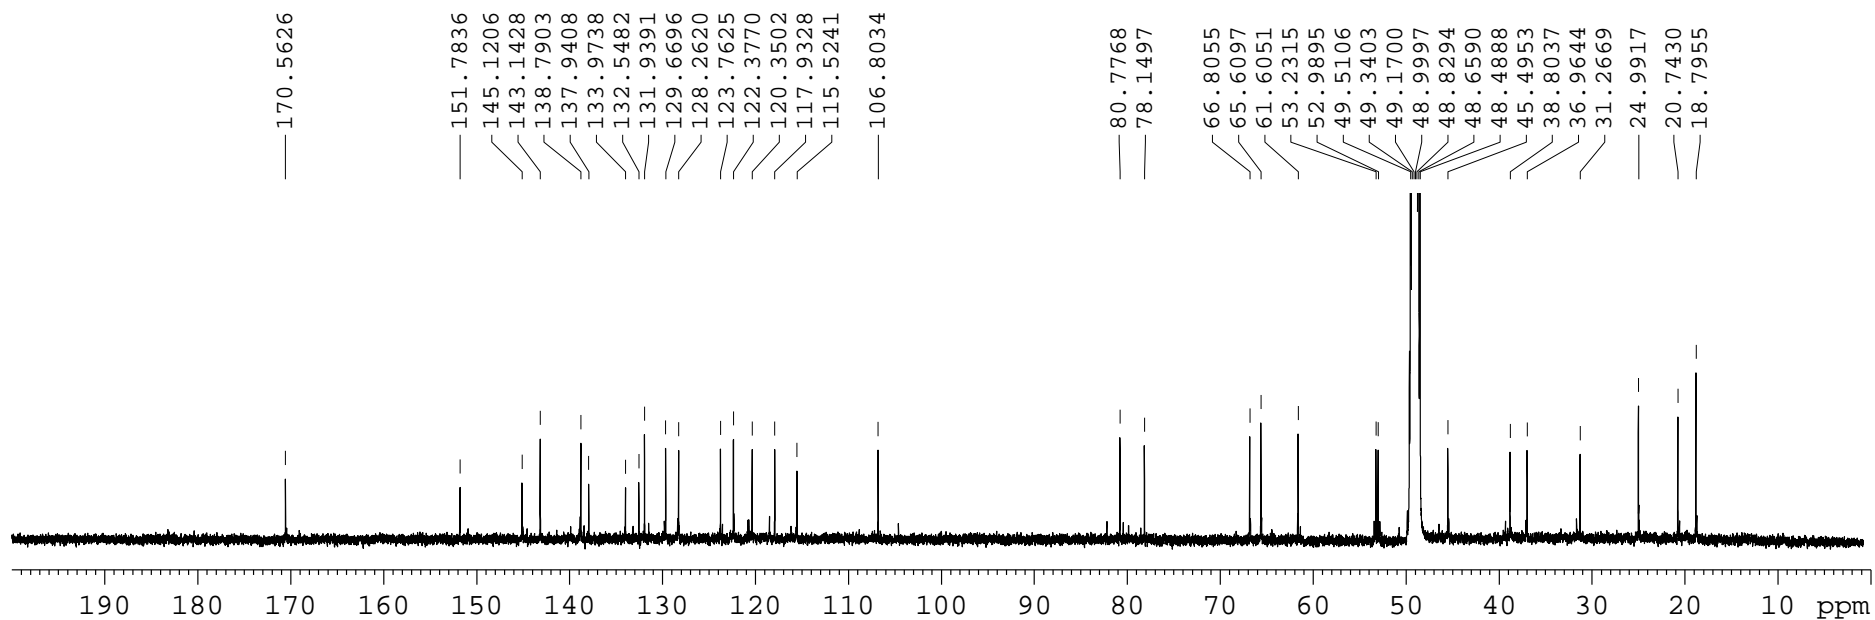

Figure S16. <sup>13</sup>C NMR spectrum of **3** (CDCl<sub>3</sub>, 125 MHz).

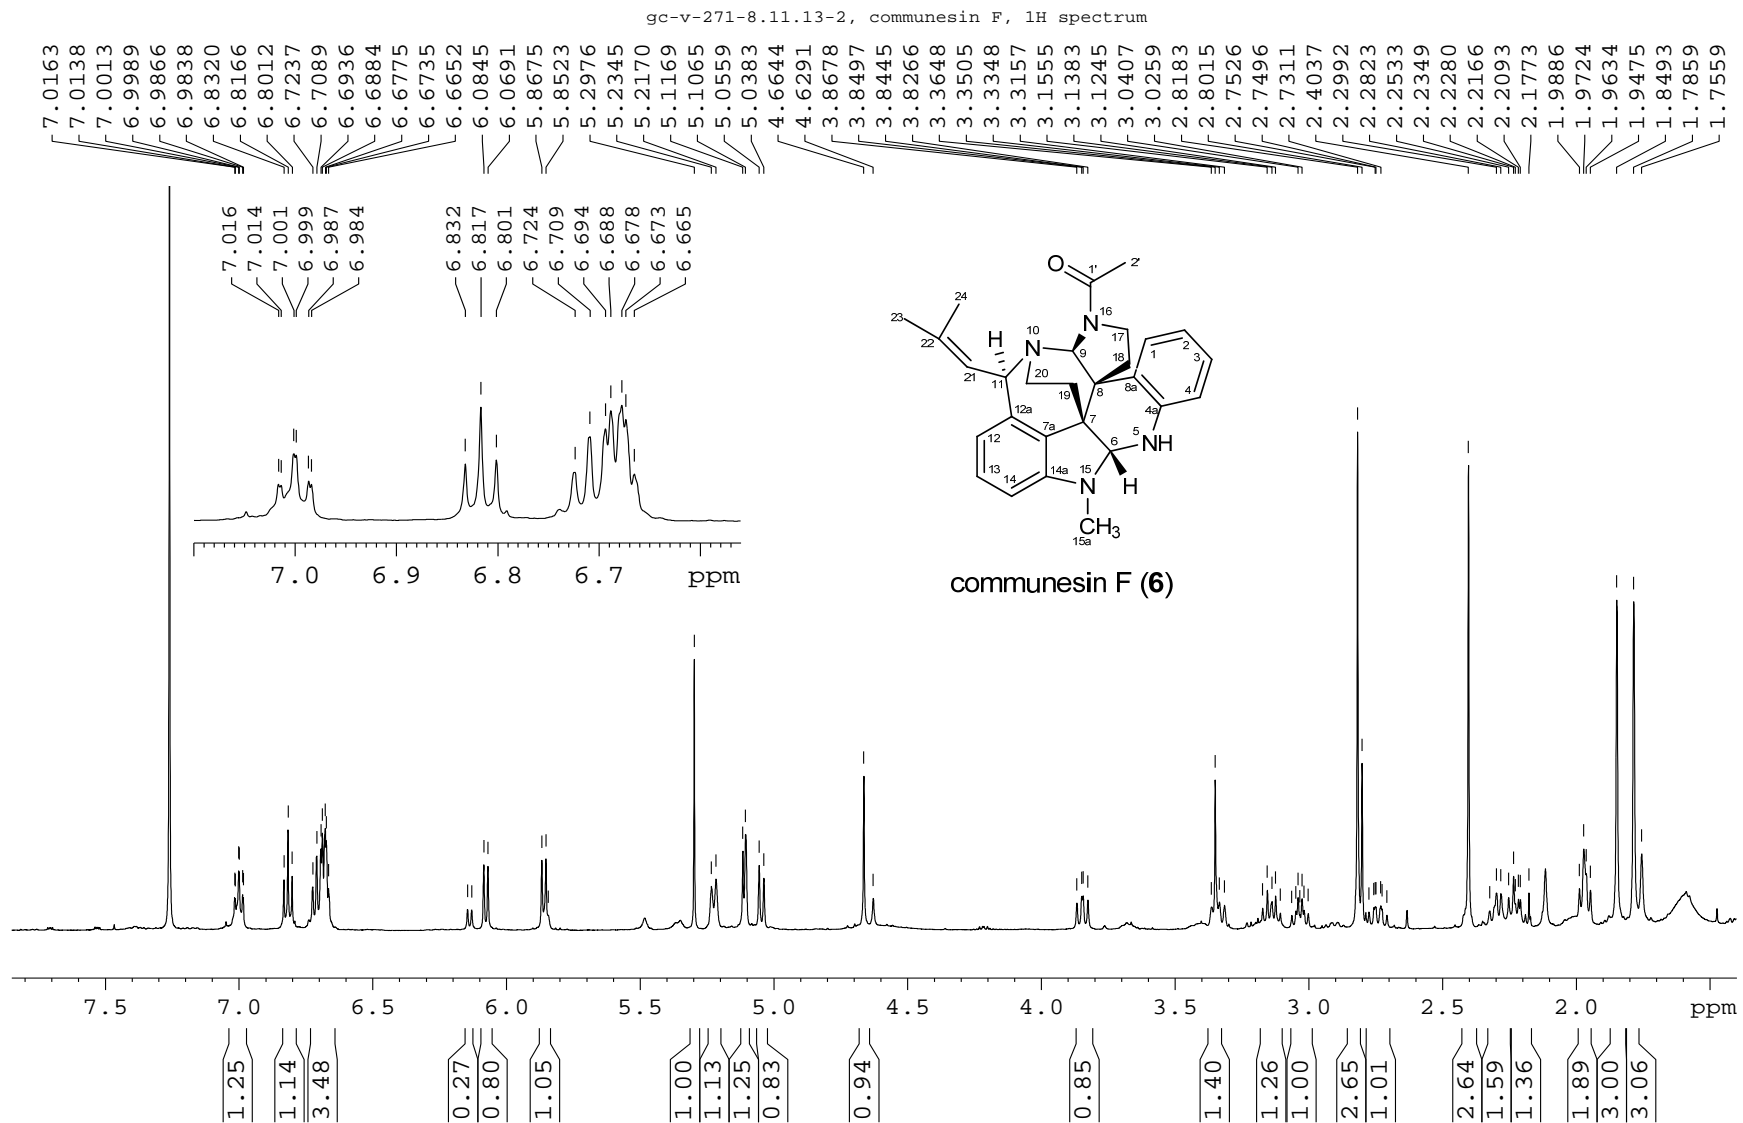

**Figure S17.**  $^1\text{H}$  NMR spectrum of **6** ( $\text{CDCl}_3$ , 500 MHz).

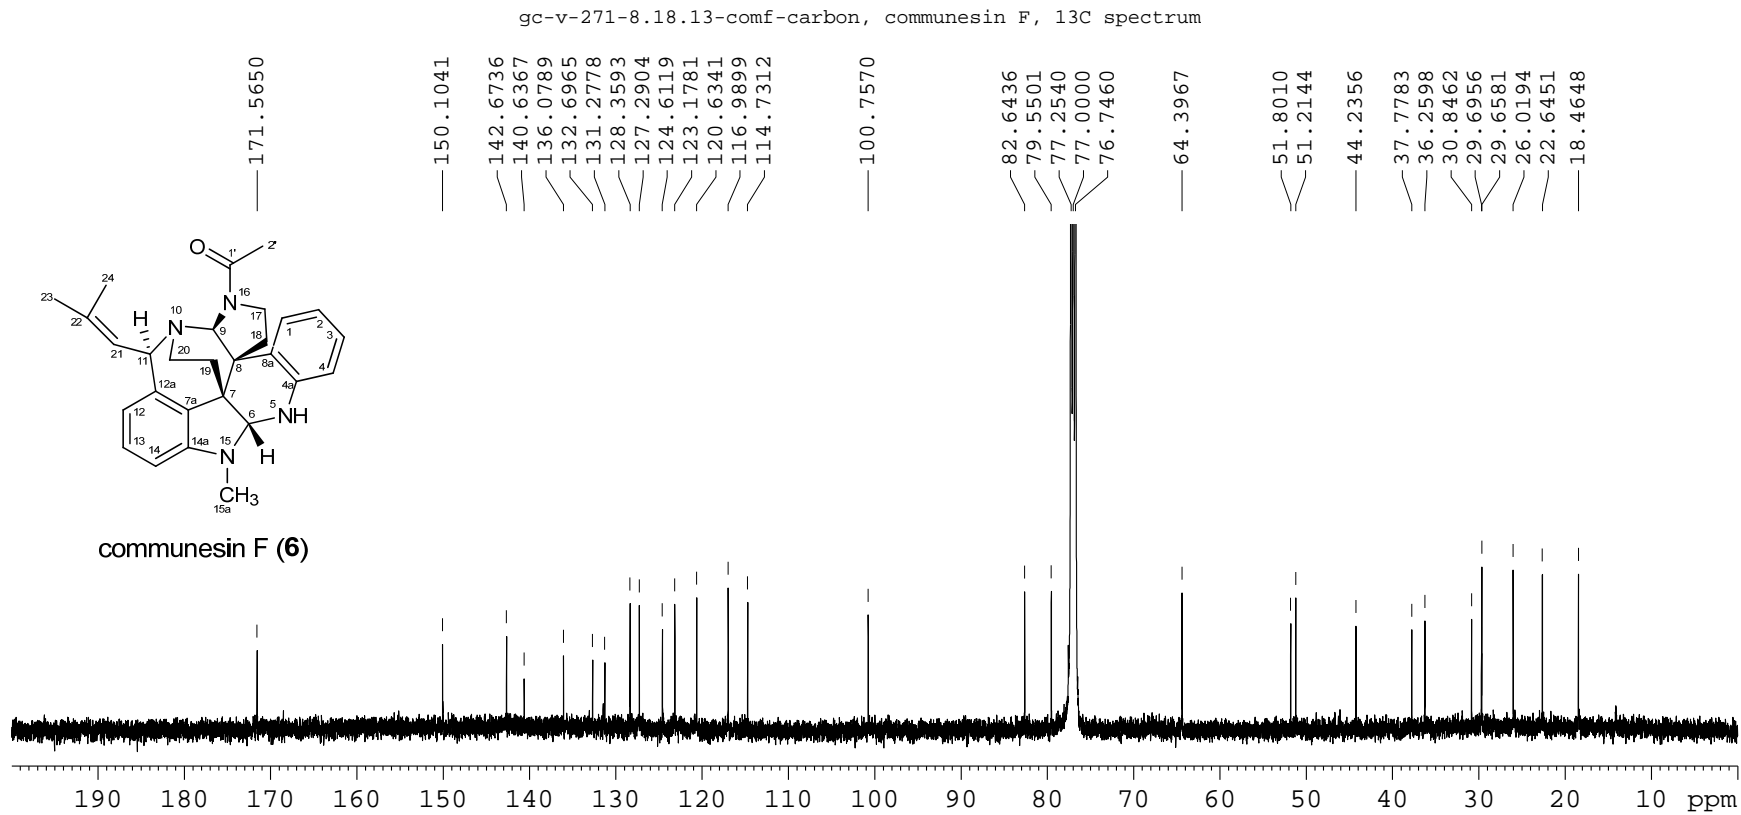

**Figure S18.**  $^{13}\text{C}$  NMR spectrum of **6** ( $\text{CDCl}_3$ , 125 MHz).

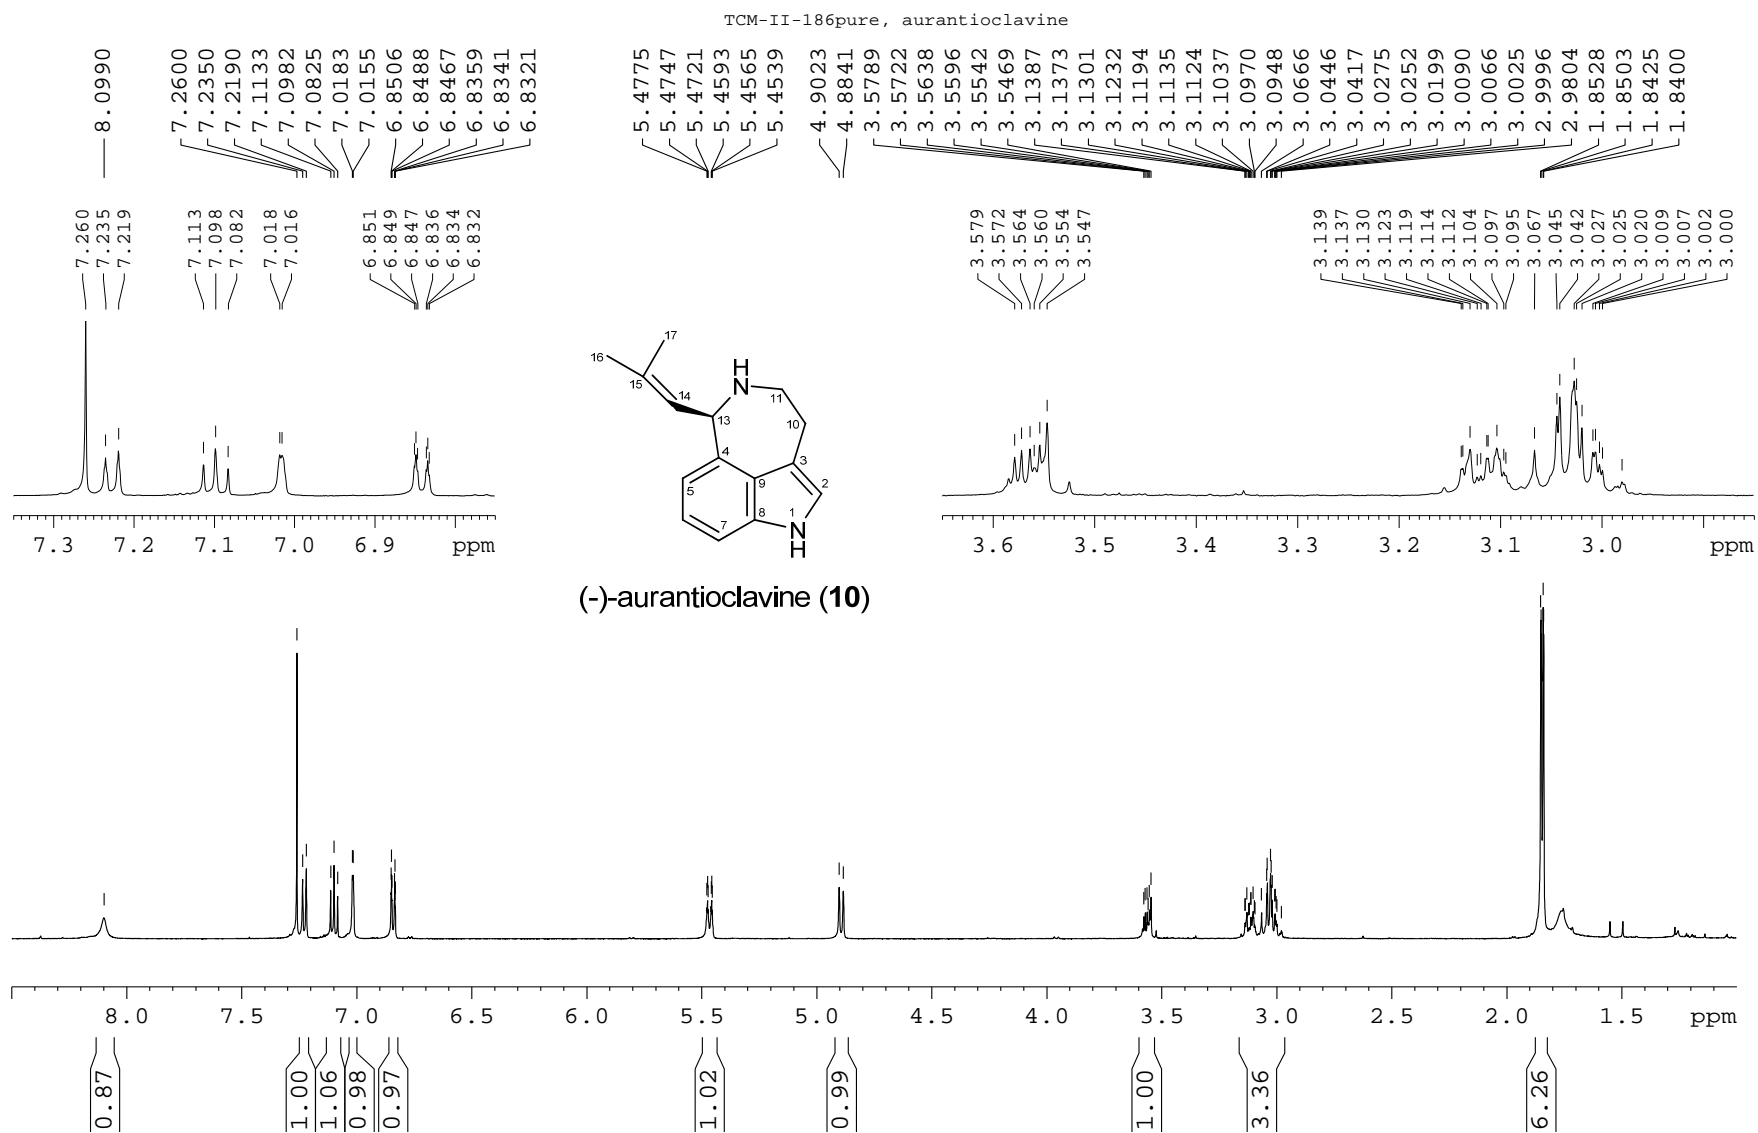

**Figure S19.**  $^1\text{H}$  NMR spectrum of **10** ( $\text{CDCl}_3$ , 500 MHz).

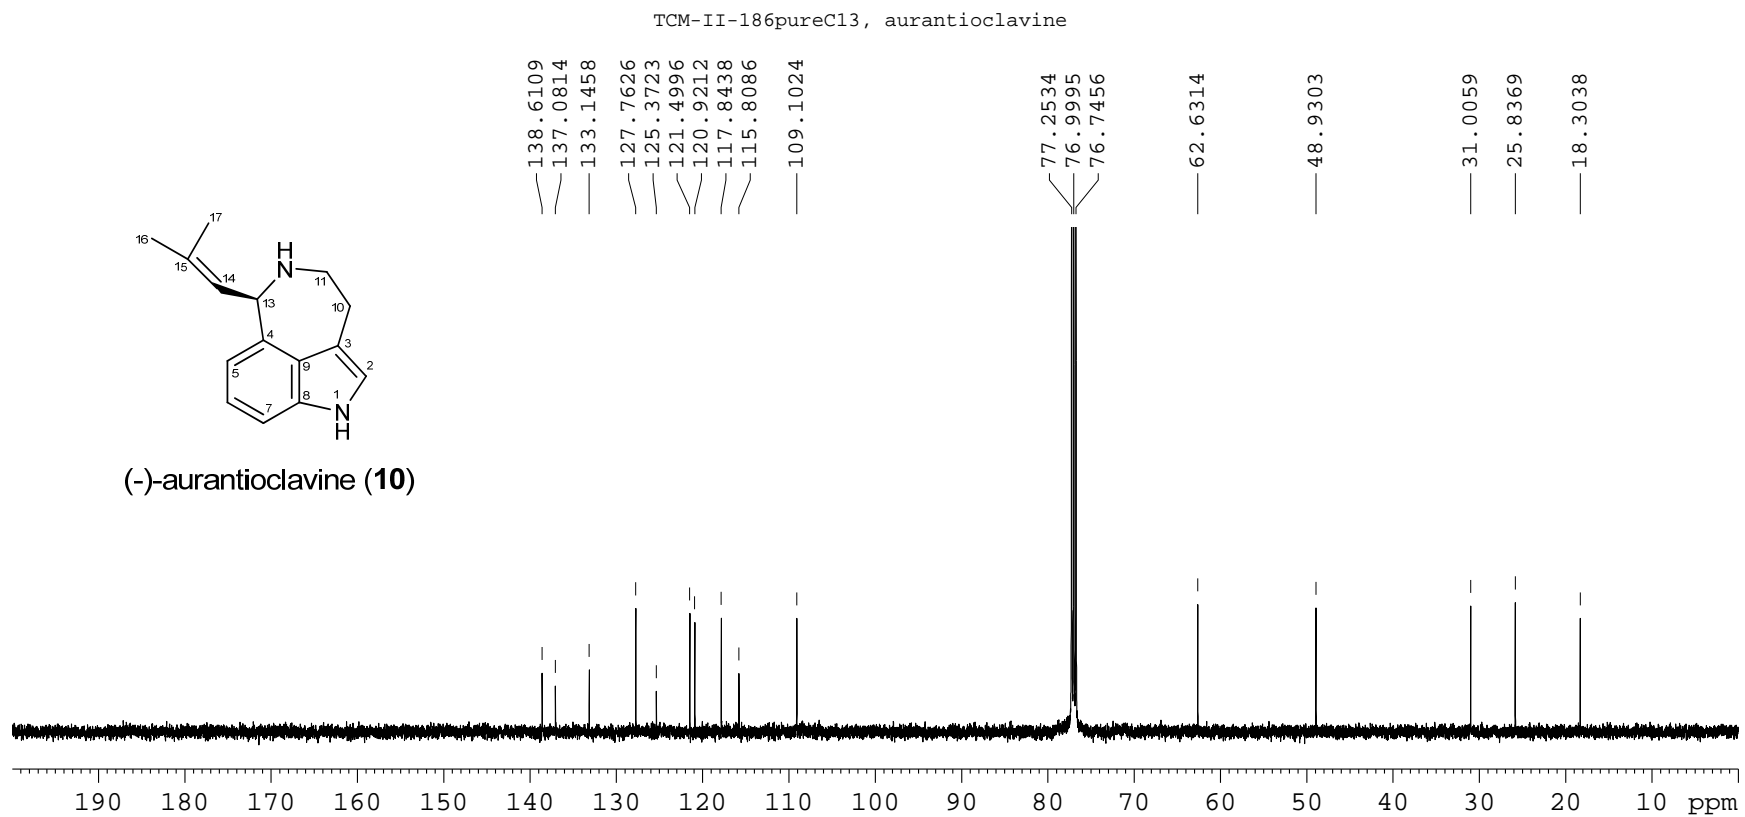

**Figure S20.**  $^{13}\text{C}$  NMR spectrum of **10** ( $\text{CDCl}_3$ , 125 MHz).

hcl-20140409 1, 1H spectrum, Peak 1-RP18 TLC, CD3OD, AV500, 2014/04/09

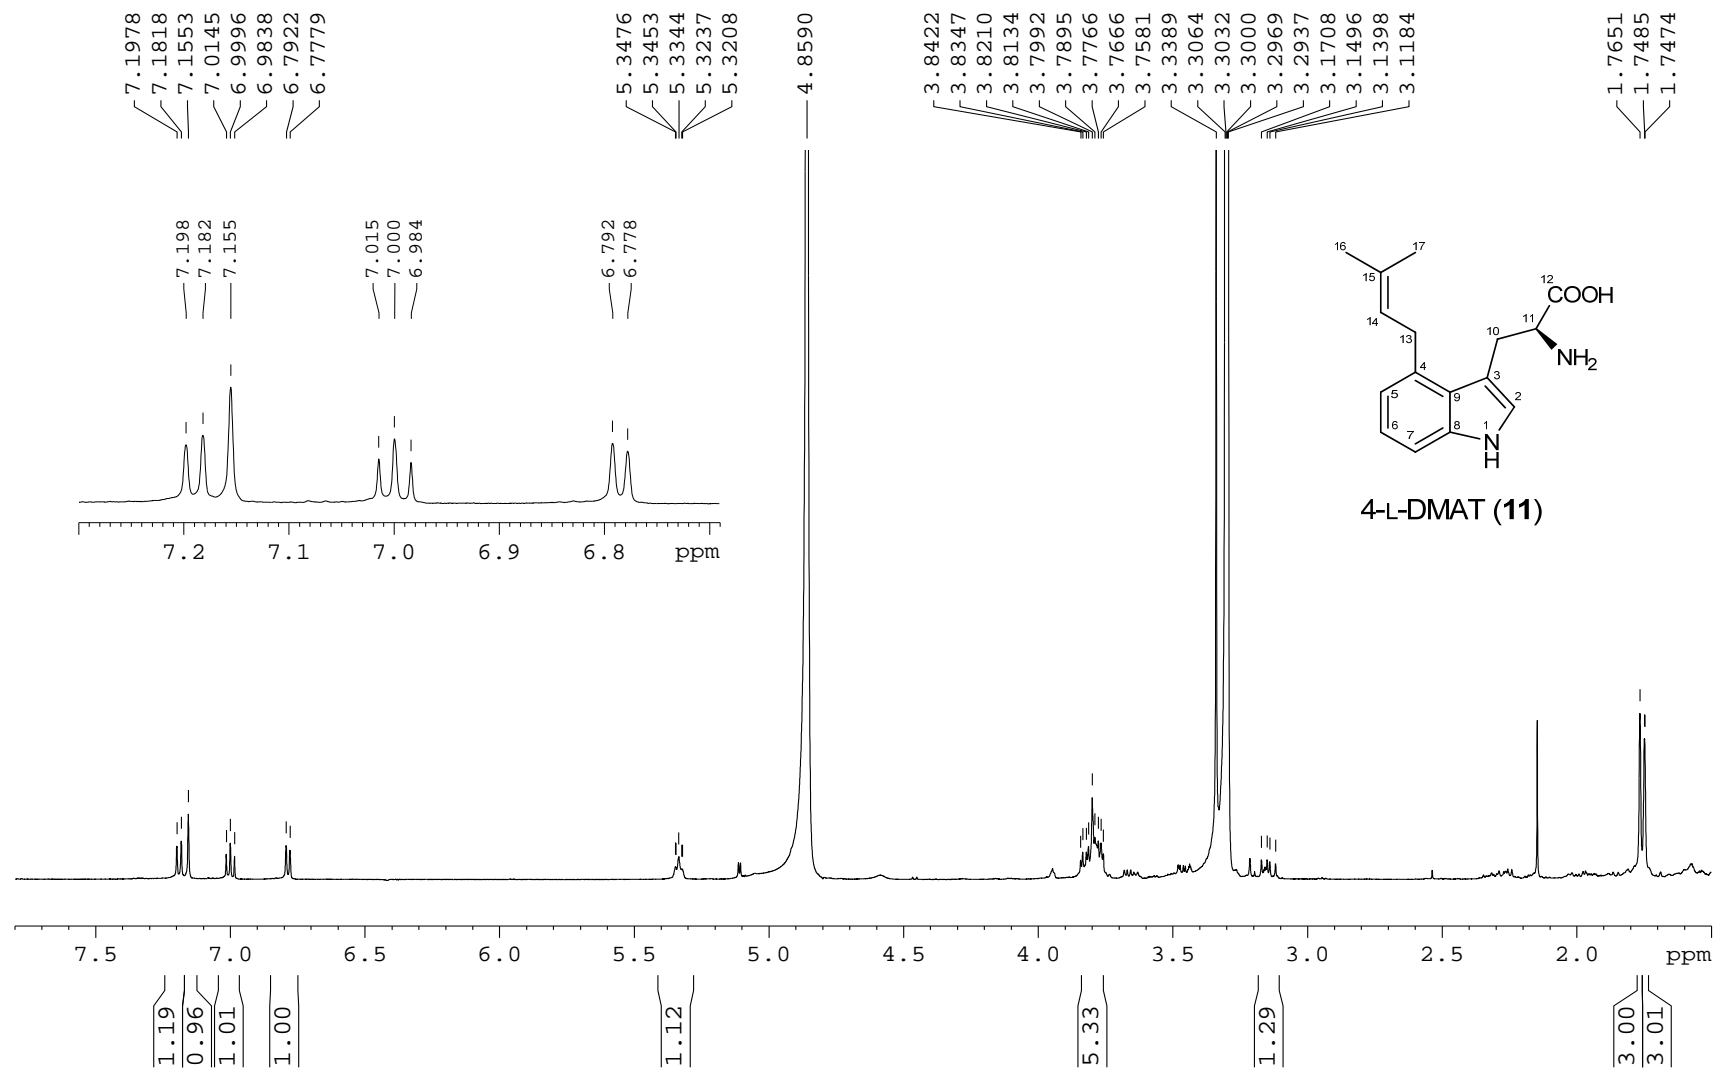

Figure S21. <sup>1</sup>H NMR spectrum of **11** (CD<sub>3</sub>OD, 500 MHz). 4-L-DMAT.

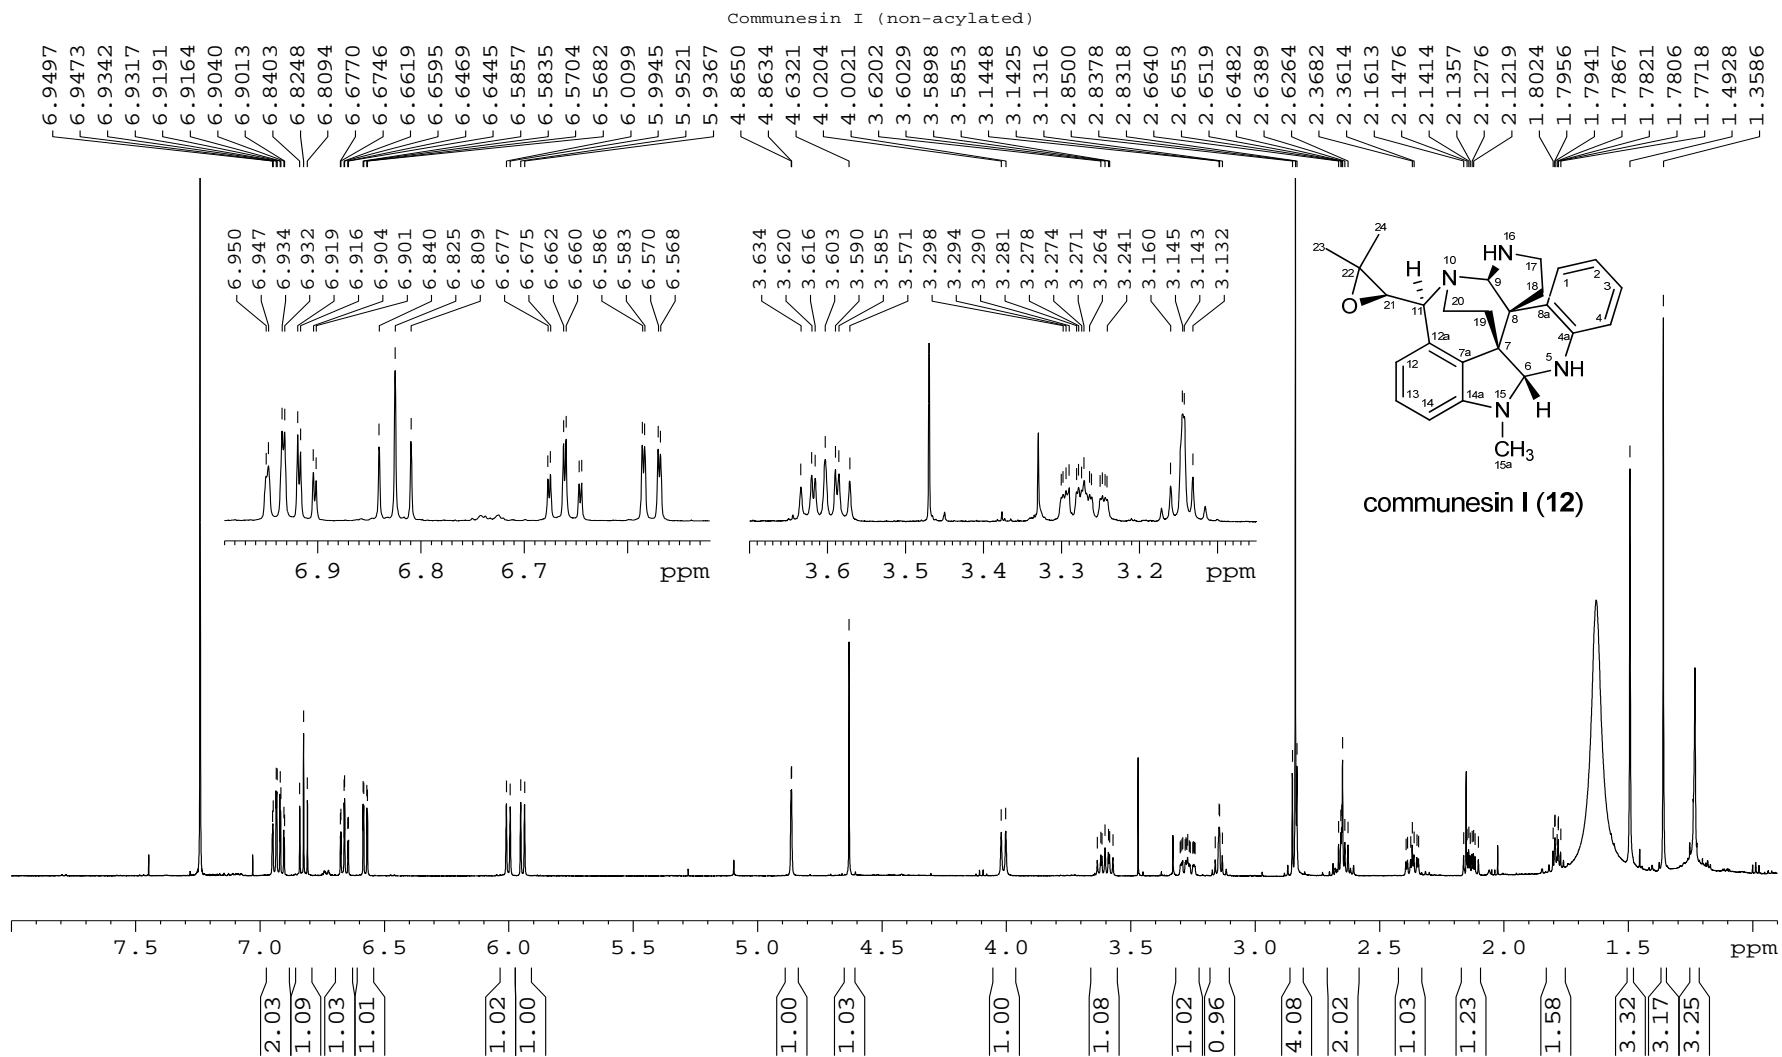

Figure S22. <sup>1</sup>H NMR spectrum of **12** (CDCl<sub>3</sub>, 500 MHz).



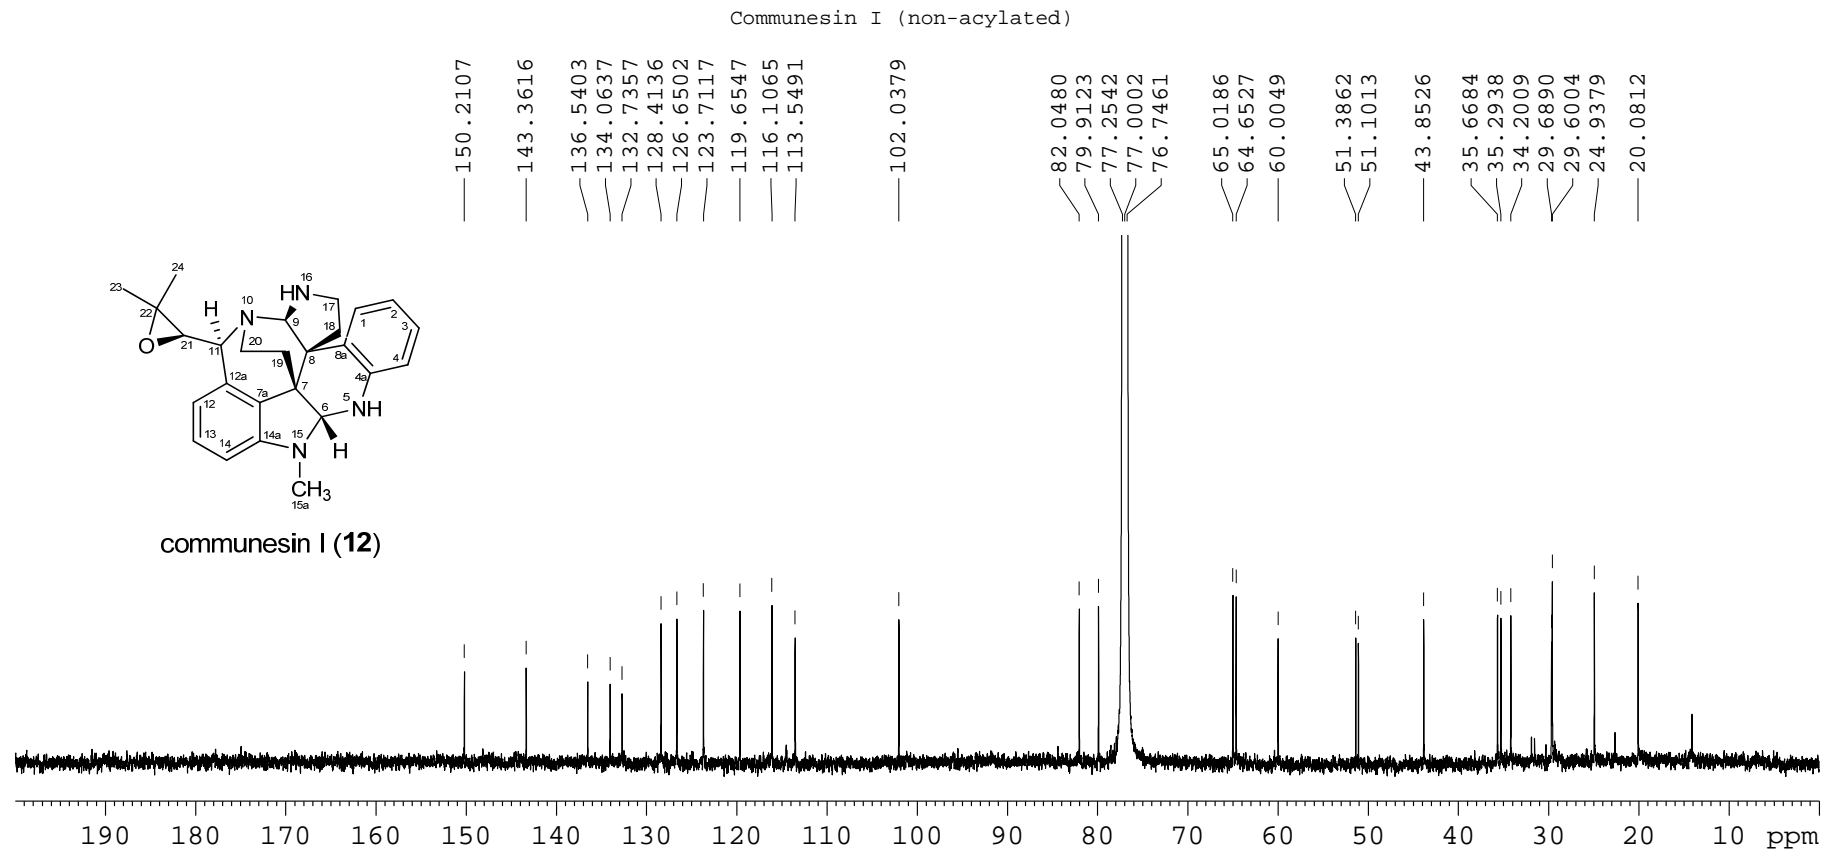

**Figure S23.** <sup>13</sup>C NMR spectrum of **12** (CDCl<sub>3</sub>, 125 MHz).

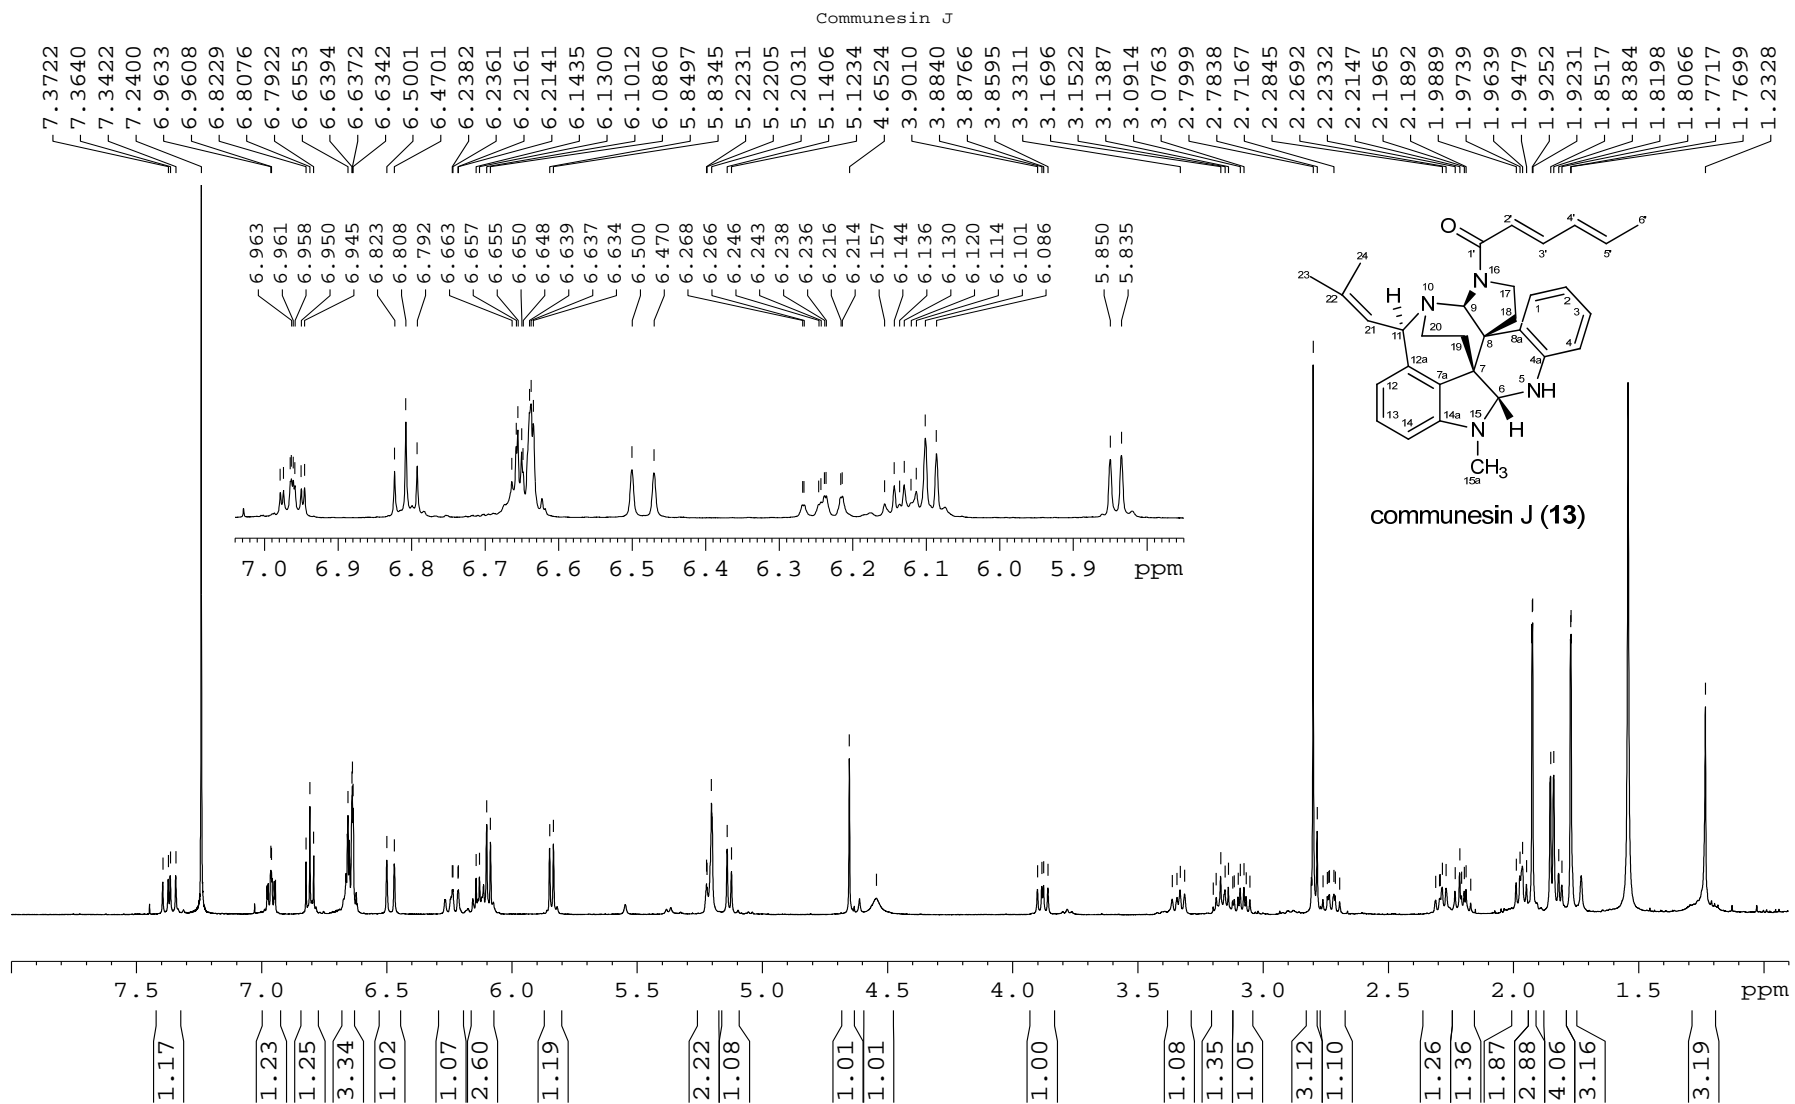

Figure S24. <sup>1</sup>H NMR spectrum of **13** (CDCl<sub>3</sub>, 500 MHz).

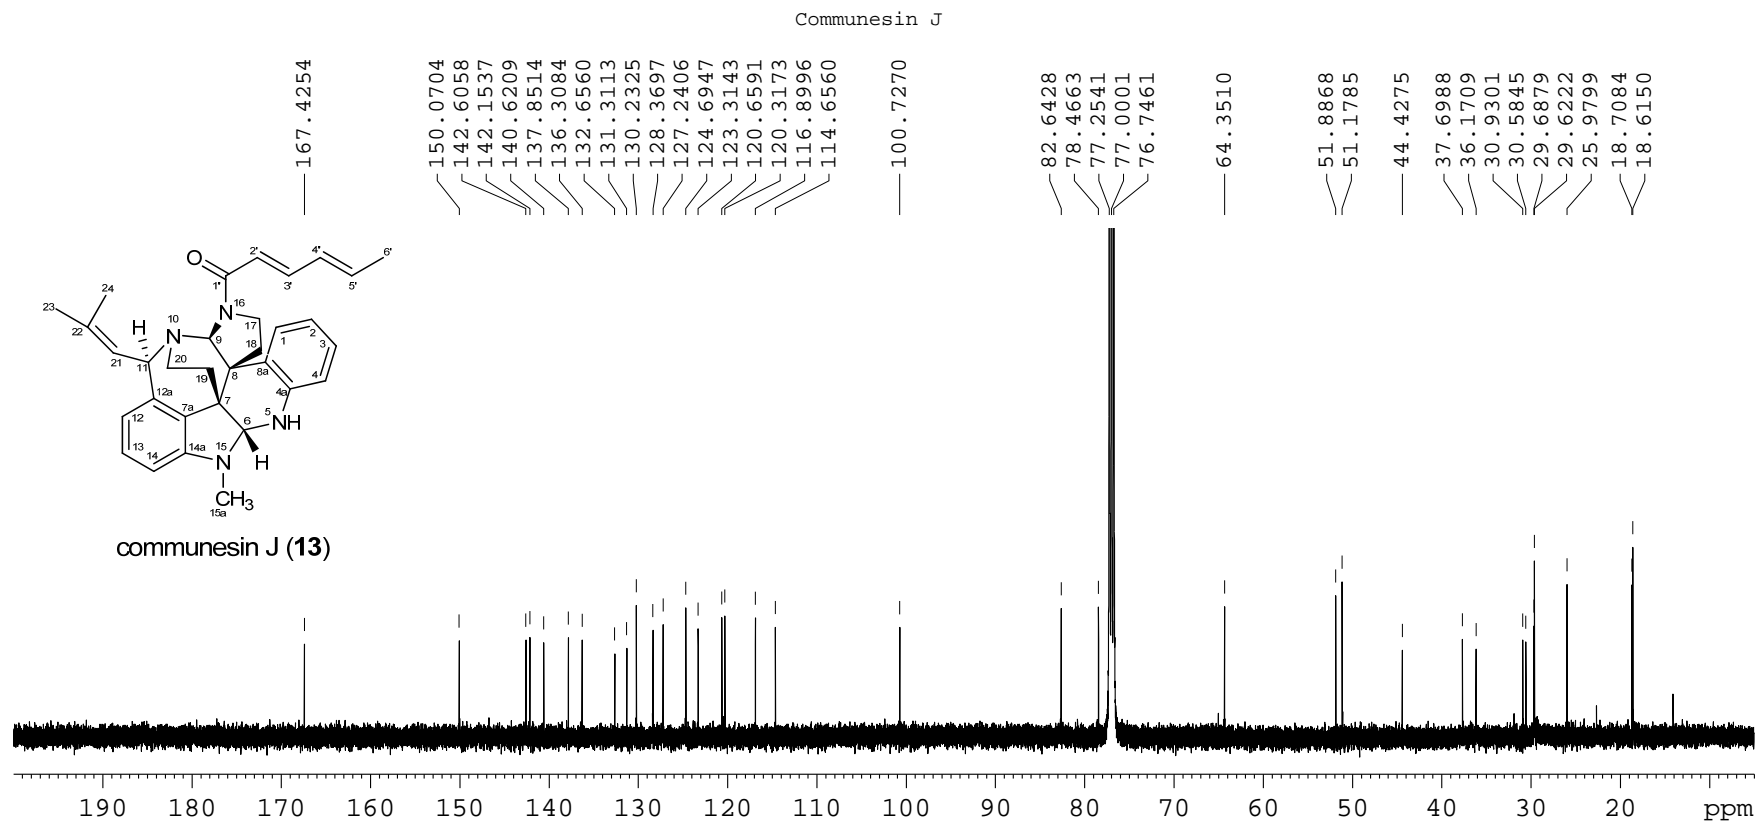

**Figure S25.**  $^{13}\text{C}$  NMR spectrum of **13** ( $\text{CDCl}_3$ , 125 MHz).

gradient-selected HSQC-INEPT135  
communesin J

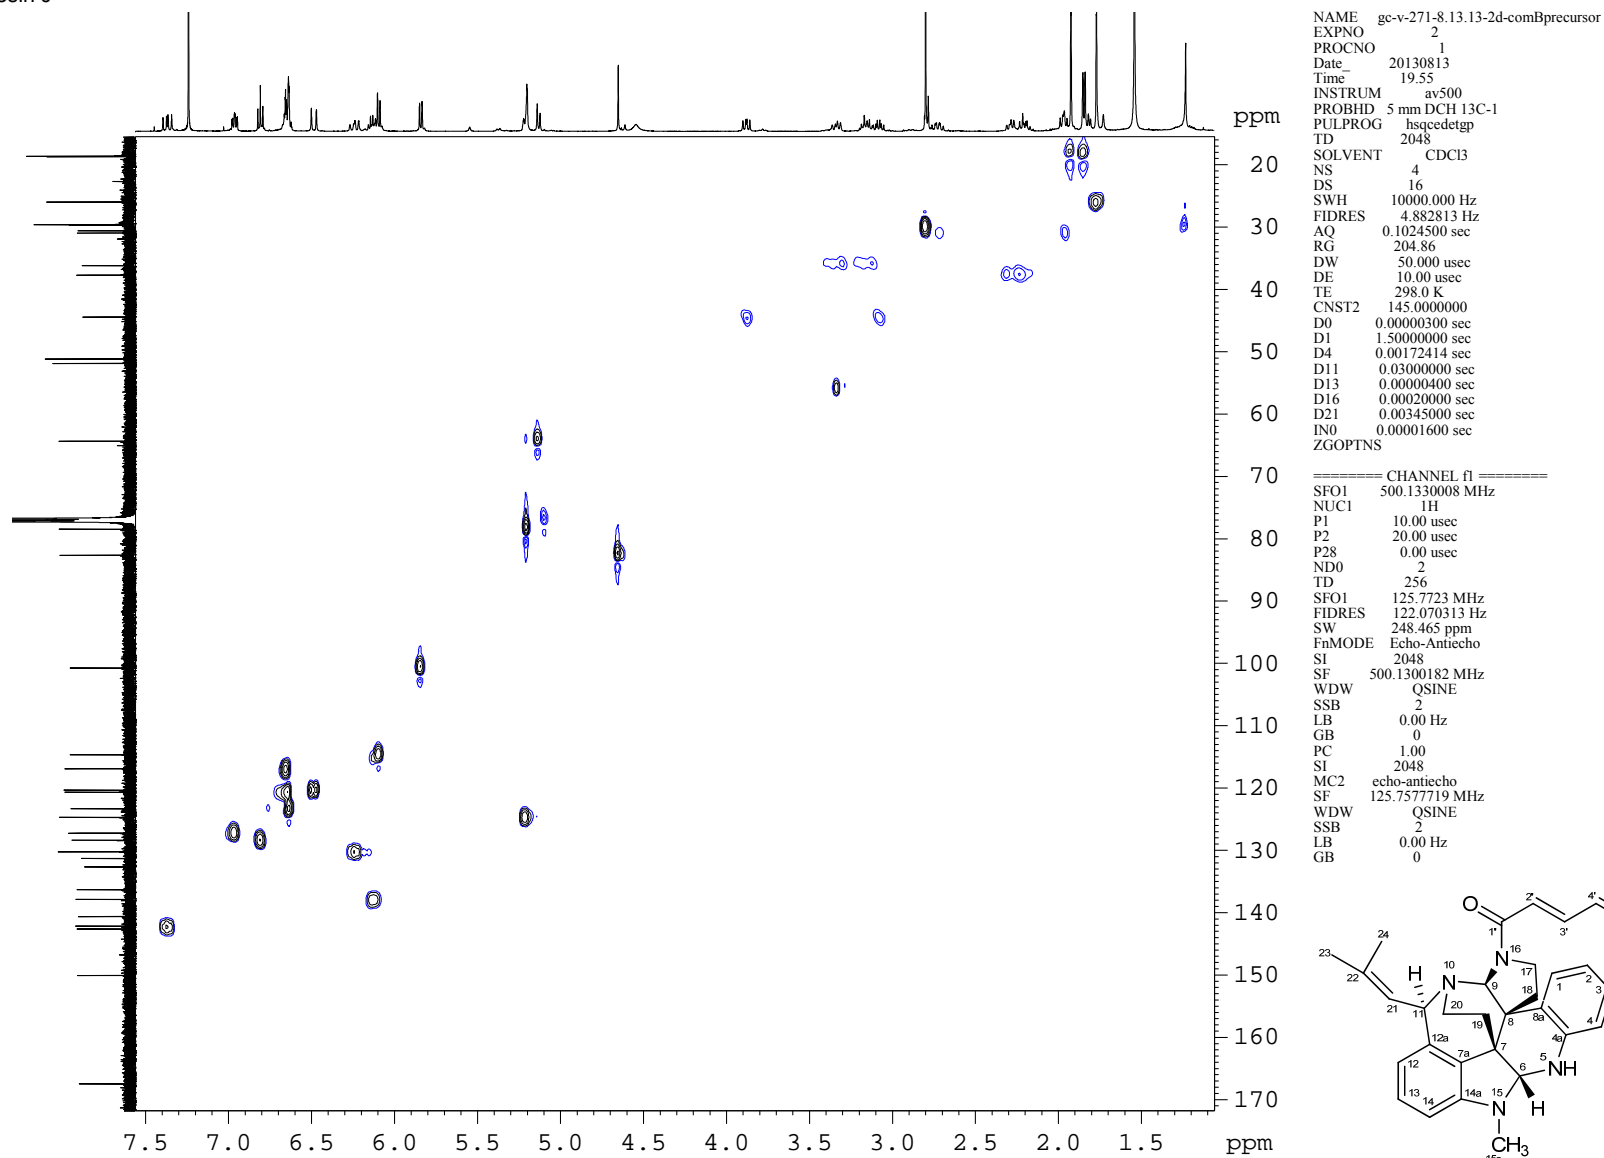

Figure S26. HSQC135 spectrum of **13** (CDCl<sub>3</sub>, 500 MHz).

communesin J  
gradient-selected HMBC

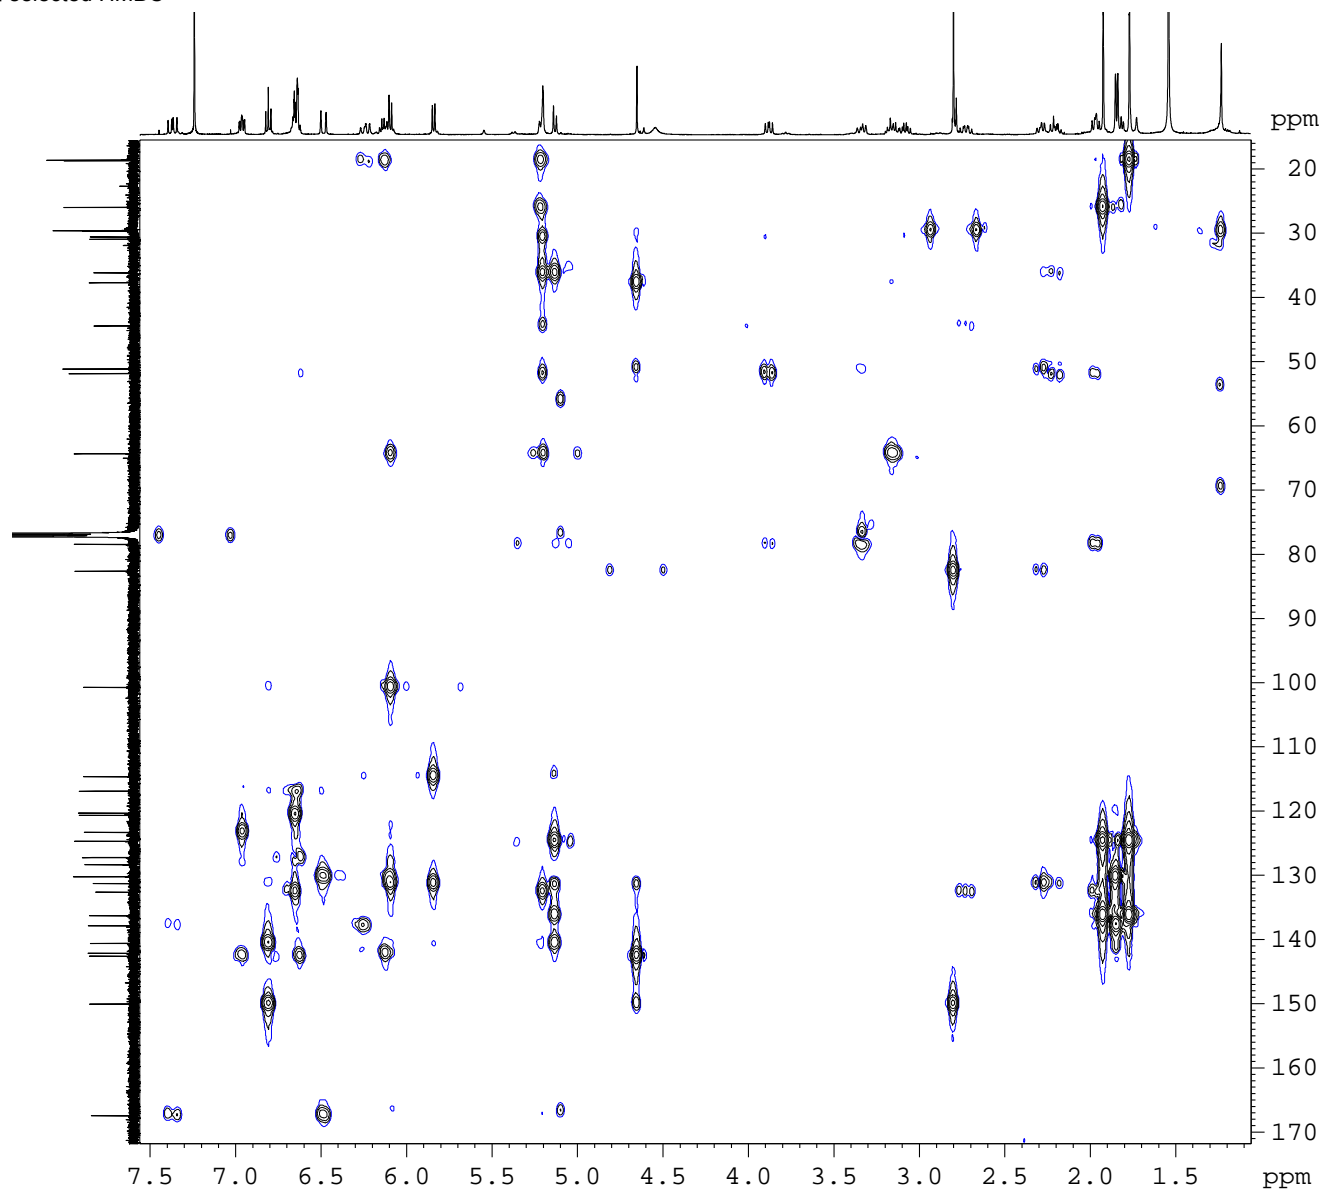

```

NAME  gc-v-271-8.13.13-2d-comBprecursor
EXPNO  3
PROCNO  1
Date_  20130813
Time    20.24
INSTRUM  av500
PROBHD  5 mm DCH 13C-1
PULPROG  hmbcgp2ndqf
TD       2048
SOLVENT  CDCl3
NS       8
DS       16
SWH      10000.000 Hz
FIDRES   4.882813 Hz
AQ       0.1024500 sec
RG       204.86
DW       50.000 usec
DE       10.00 usec
TE       298.0 K
CNST6    120.0000000
CNST7    160.0000000
CNST13   7.0000000
D0       0.000003000 sec
D1       2.000000000 sec
D6       0.07142857 sec
D16      0.00020000 sec
IN0      0.00001600 sec
  
```

```

===== CHANNEL f1 =====
SFO1    500.1330008 MHz
NUC1     1H
P1       10.00 usec
P2       20.00 usec
ND0      2
TD       256
SFO1    125.7723 MHz
FIDRES   122.070313 Hz
SW       248.465 ppm
FnMODE   QF
SI       2048
SF       500.1300198 MHz
WDW      QSINE
SSB      2
LB       0.00 Hz
GB       0
PC       1.00
SI       2048
MC2     QF
SF       125.7578104 MHz
WDW      QSINE
SSB      2
LB       0.00 Hz
GB       0
  
```

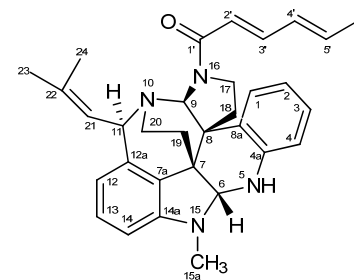

communesin J (**13**)

Figure S27. HMBC spectrum of **13** (CDCl<sub>3</sub>, 500 MHz).

hcl-20140709 1, <sup>1</sup>H spectrum, KO16-EA-Combi-Fr5-peak2, 0.7 mg, in CD3OD, 500 MHz-cryo, 2014/07/09

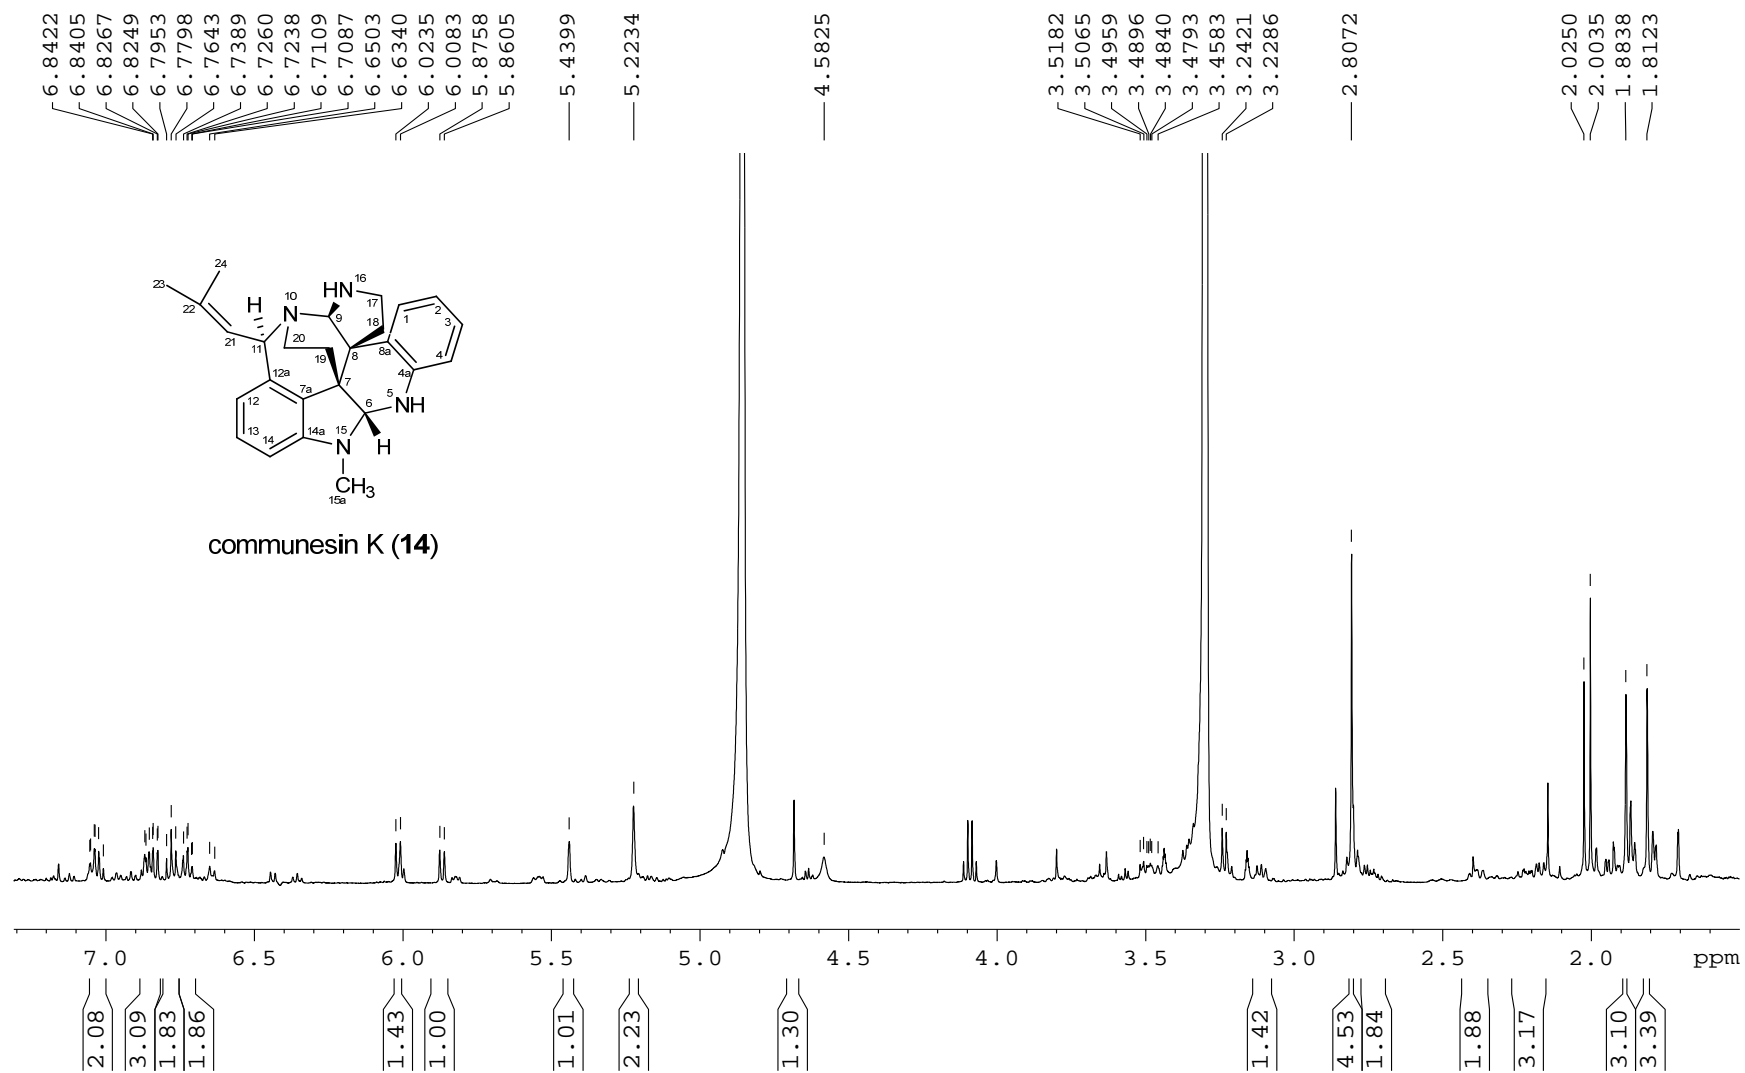

**Figure S28.** <sup>1</sup>H NMR spectrum of **14** (CDCl<sub>3</sub>, 500 MHz).

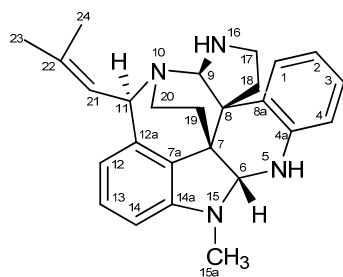

communesin K (**14**)

hcl-20140718 12, 13C spectrum, KO16-EA-Combi-Fr5-peak2, CD3OD, 500 MHz-cryo, 2014/07/18

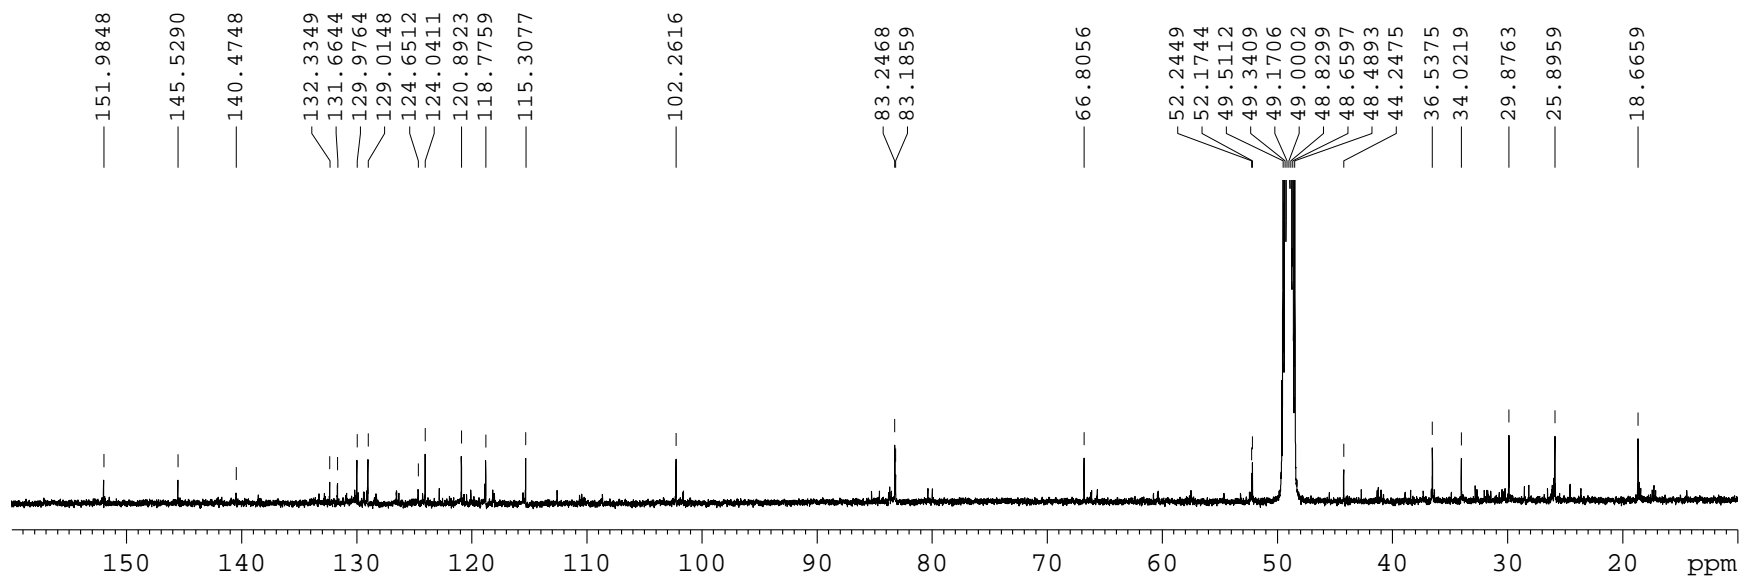

Figure S29.  $^{13}\text{C}$  NMR spectrum of **14** ( $\text{CDCl}_3$ , 125 MHz).

hcl-20140718 13  
 HSQC  
 KO16-EA-Combi-Fr5-peak2  
 CD3OD  
 500 MHz-cryo  
 2014/07/18

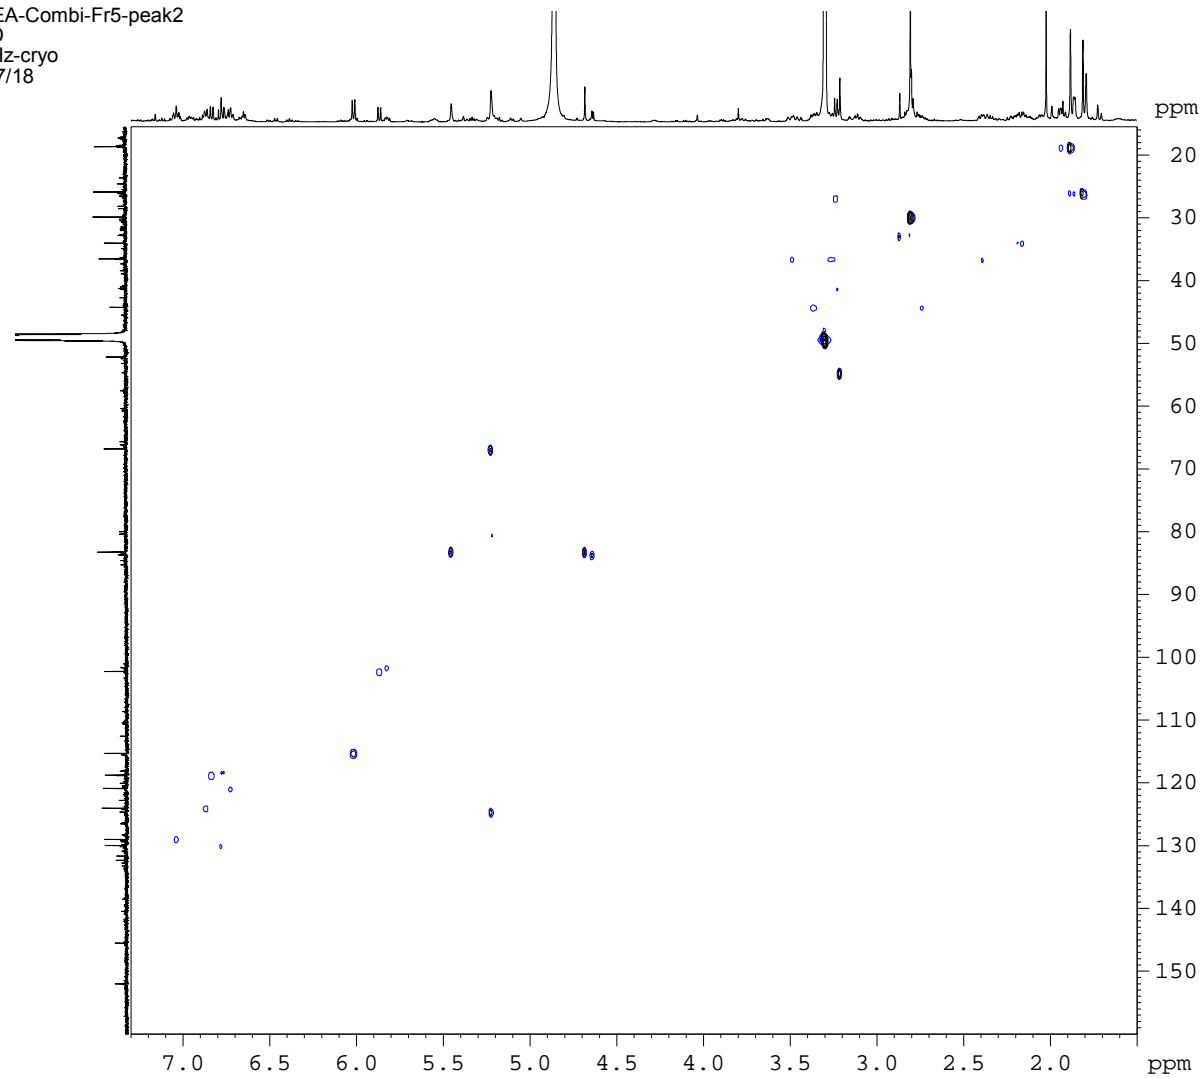

NAME hcl-20140709 Com core-methyl  
 EXPNO 13  
 PROCNO 1  
 Date\_ 20140718  
 Time 23.44  
 INSTRUM av500  
 PROBHD 5 mm DCH 13C-1  
 PULPROG hsqcedtgp  
 TD 2048  
 SOLVENT MeOD  
 NS 12  
 DS 16  
 SWH 6493.506 Hz  
 FIDRES 3.170657 Hz  
 AQ 0.1577460 sec  
 RG 202.91  
 DW 77.000 usec  
 DE 10.00 usec  
 TE 298.0 K  
 CNST2 145.0000000  
 D0 0.0000300 sec  
 D1 1.5000000 sec  
 D4 0.00172414 sec  
 D11 0.03000000 sec  
 D13 0.00000400 sec  
 D16 0.00020000 sec  
 D21 0.00345000 sec  
 IN0 0.00002480 sec  
 ZGPTNS

===== CHANNEL f1 =====  
 SFO1 500.1330008 MHz  
 NUC1 1H  
 P1 10.00 usec  
 P2 20.00 usec  
 P28 0.00 usec  
 ND0 2  
 TD 256  
 SFO1 125.7677 MHz  
 FIDRES 78.755043 Hz  
 SW 160.306 ppm  
 FmMODE Echo-Antiecho  
 SI 2048  
 SF 500.1300124 MHz  
 WDW QSINE  
 SSB 2  
 LB 0.00 Hz  
 GB 0  
 PC 1.40  
 SI 2048  
 MC2 echo-antiecho  
 SF 125.7575951 MHz  
 WDW QSINE  
 SSB 2  
 LB 0.00 Hz  
 GB 0

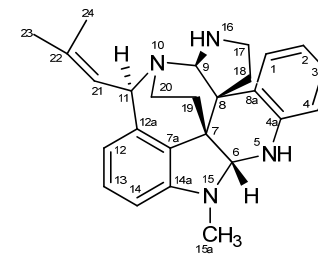

communesin K (**14**)

Figure S30. HSQC-135 spectrum of **14** (CDCl<sub>3</sub>, 500 MHz).



hcl-20140718 15  
 HMBC  
 KO16-EA-Combi-Fr5-peak2  
 CD3OD  
 500 MHz-cryo  
 2014/07/18

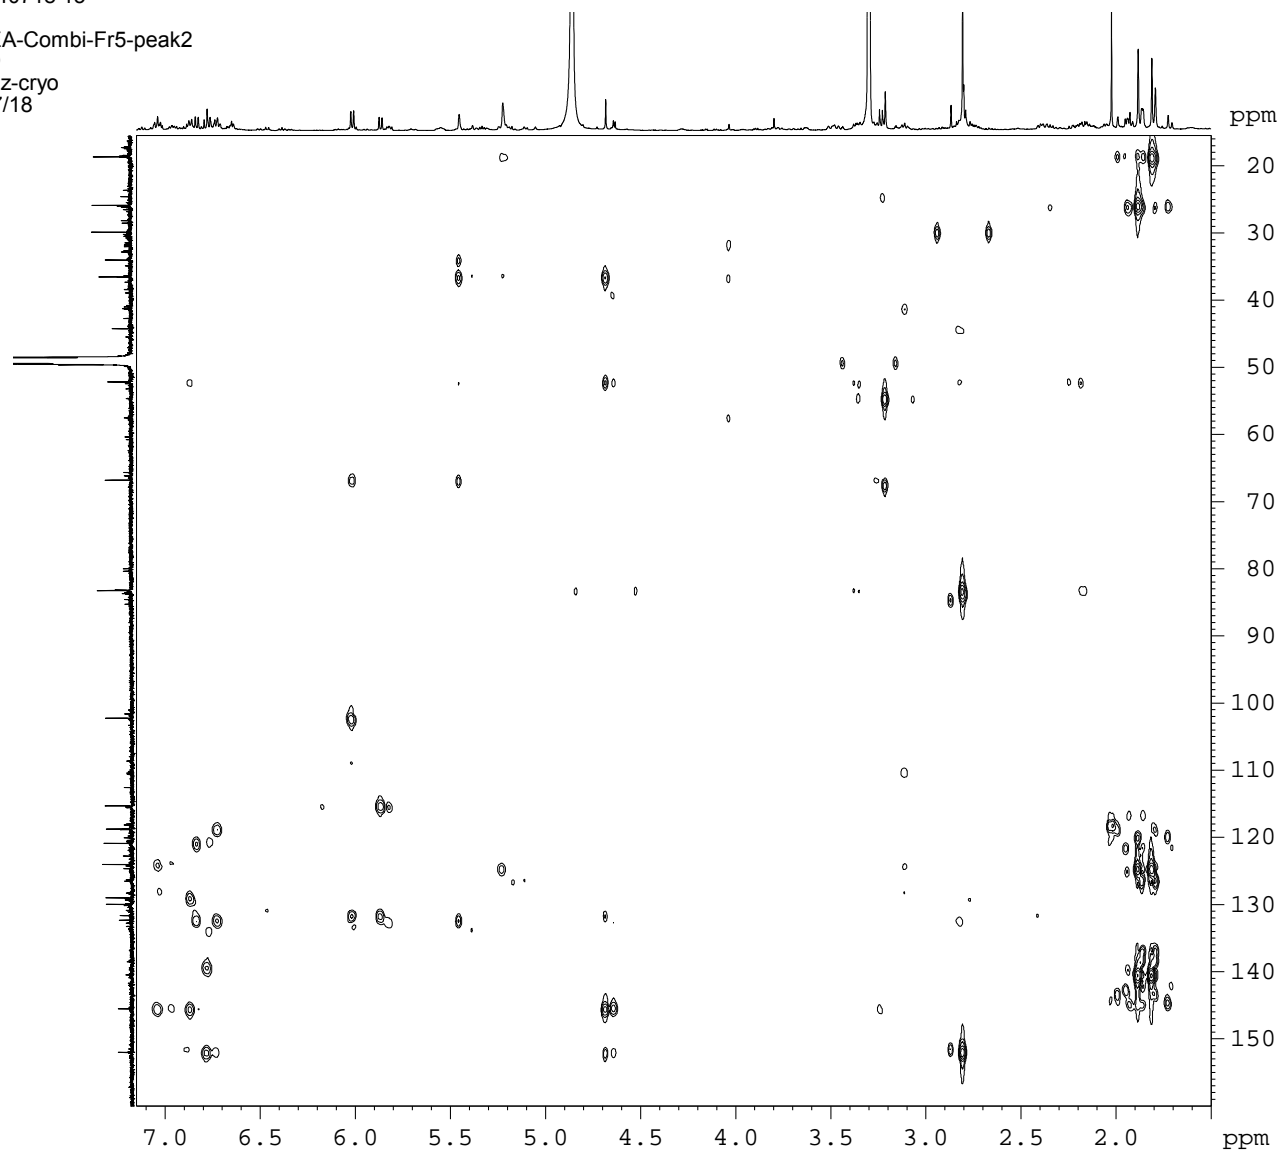

NAME hcl-20140709 Com core-methyl  
 EXPNO 15  
 PROCNO 1  
 Date\_ 20140719  
 Time 7.52  
 INSTRUM av500  
 PROBHD 5 mm DCH 13C-1  
 PULPROG hmbcgp12ndqf  
 TD 2048  
 SOLVENT MeOD  
 NS 20  
 DS 16  
 SWH 5151.099 Hz  
 FIDRES 2.515185 Hz  
 AQ 0.1988425 sec  
 RG 202.91  
 DW 97.067 usec  
 DE 10.00 usec  
 TE 298.0 K  
 CNST6 120.0000000  
 CNST7 160.0000000  
 CNST13 7.0000000  
 D0 0.00000300 sec  
 D1 2.00000000 sec  
 D6 0.07142857 sec  
 D16 0.00020000 sec  
 IN0 0.00001810 sec

===== CHANNEL f1 =====  
 SFO1 500.1324246 MHz  
 NUC1 1H  
 P1 10.00 usec  
 P2 20.00 usec  
 ND0 2  
 TD 256  
 SFO1 125.7716 MHz  
 FIDRES 107.907455 Hz  
 SW 219.639 ppm  
 FMODE QF  
 SI 2048  
 SF 500.1300142 MHz  
 WDW QSINE  
 SSB 2  
 LB 0.00 Hz  
 GB 0  
 PC 1.40  
 SI 2048  
 MC2 QF  
 SF 125.7575903 MHz  
 WDW QSINE  
 SSB 2  
 LB 0.00 Hz  
 GB 0

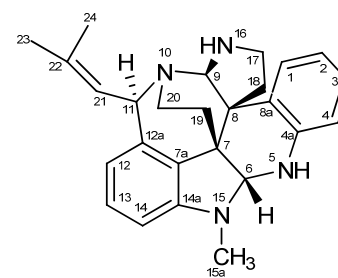

communesin K (**14**)

Figure S31. HMBC spectrum of **14** (CDCl<sub>3</sub>, 500 MHz).

hcl-20140718 14  
KO16-EA-Combi-Fr5-peak2  
NOESY  
CD3OD, 500 MHz-cryo  
2014/07/18

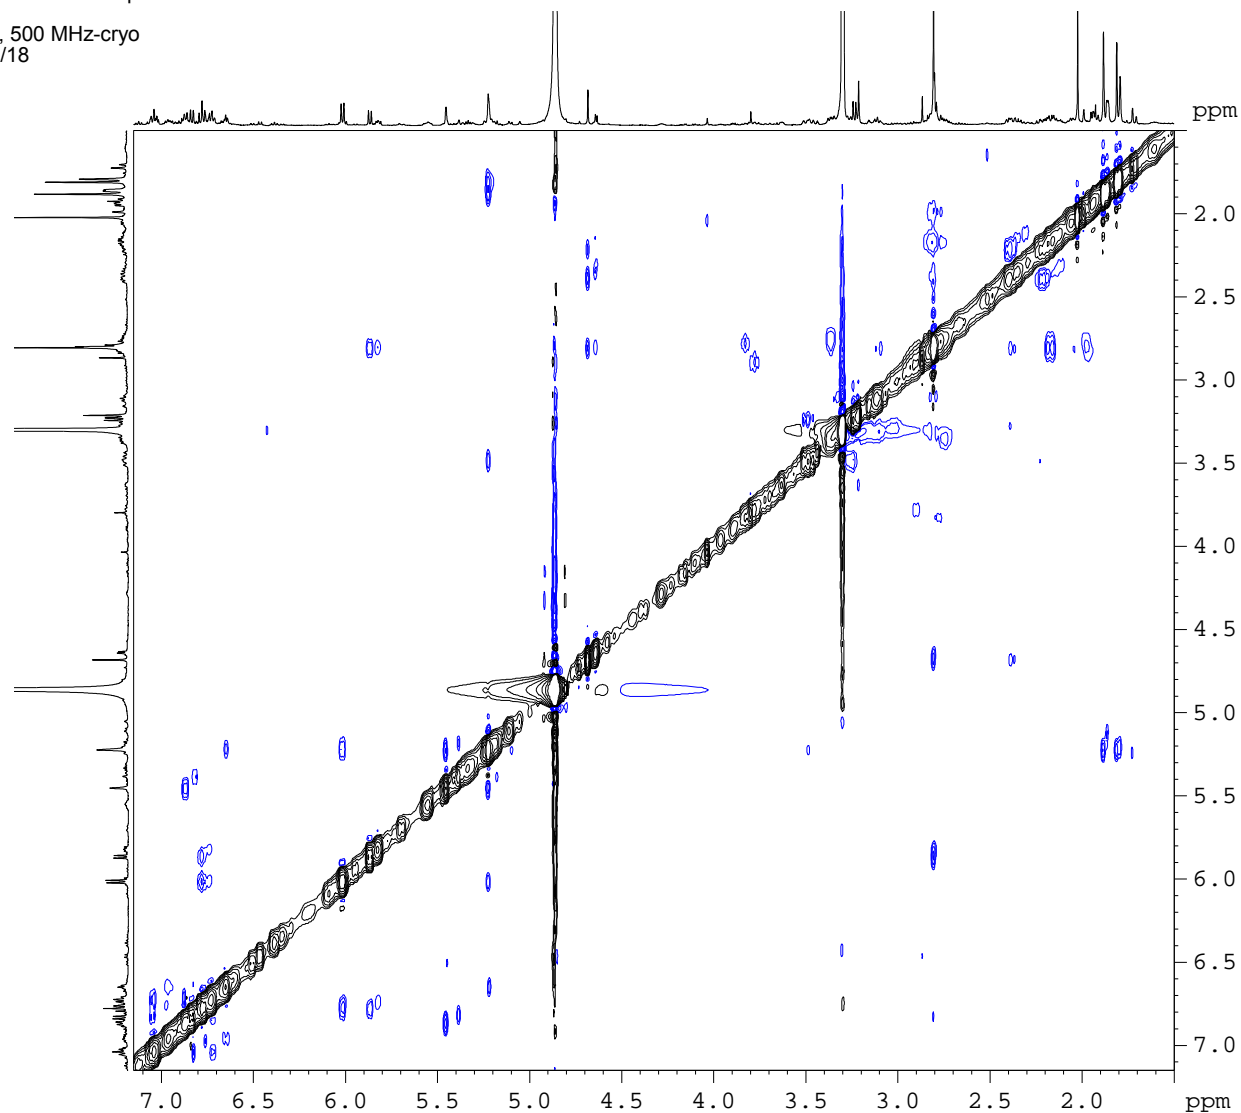

NAME hcl-20140709 Com core-methyl  
EXPNO 14  
PROCNO 1  
Date\_ 20140719  
Time 1.12  
INSTRUM av500  
PROBHD 5 mm DCH 13C-1  
PULPROG noesygpph  
TD 2048  
SOLVENT MeOD  
NS 32  
DS 8  
SWH 6009.615 Hz  
FIDRES 2.934382 Hz  
AQ 0.1704436 sec  
RG 28.6  
DW 83.200 usec  
DE 10.00 usec  
TE 298.0 K  
D0 0.00007057 sec  
D1 2.00000000 sec  
D8 0.75000000 sec  
D16 0.00020000 sec  
IN0 0.00016660 sec

===== CHANNEL f1 =====  
SFO1 500.1329508 MHz  
NUC1 1H  
P1 10.00 usec  
P2 20.00 usec  
ND0 1  
TD 256  
SFO1 500.133 MHz  
FIDRES 23.446878 Hz  
SW 12.002 ppm  
FnMODE States-TPPI  
SI 2048  
SF 500.1300136 MHz  
WDW QSINE  
SSB 2  
LB 0.00 Hz  
GB 0  
PC 1.40  
SI 2048  
MC2 States-TPPI  
SF 500.1300136 MHz  
WDW QSINE  
SSB 2  
LB 0.00 Hz  
GB 0

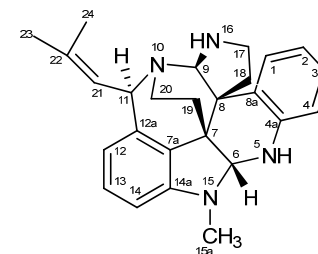

communesin K (**14**)

Figure S32. NOESY spectrum of **14** (CDCl<sub>3</sub>, 500 MHz).

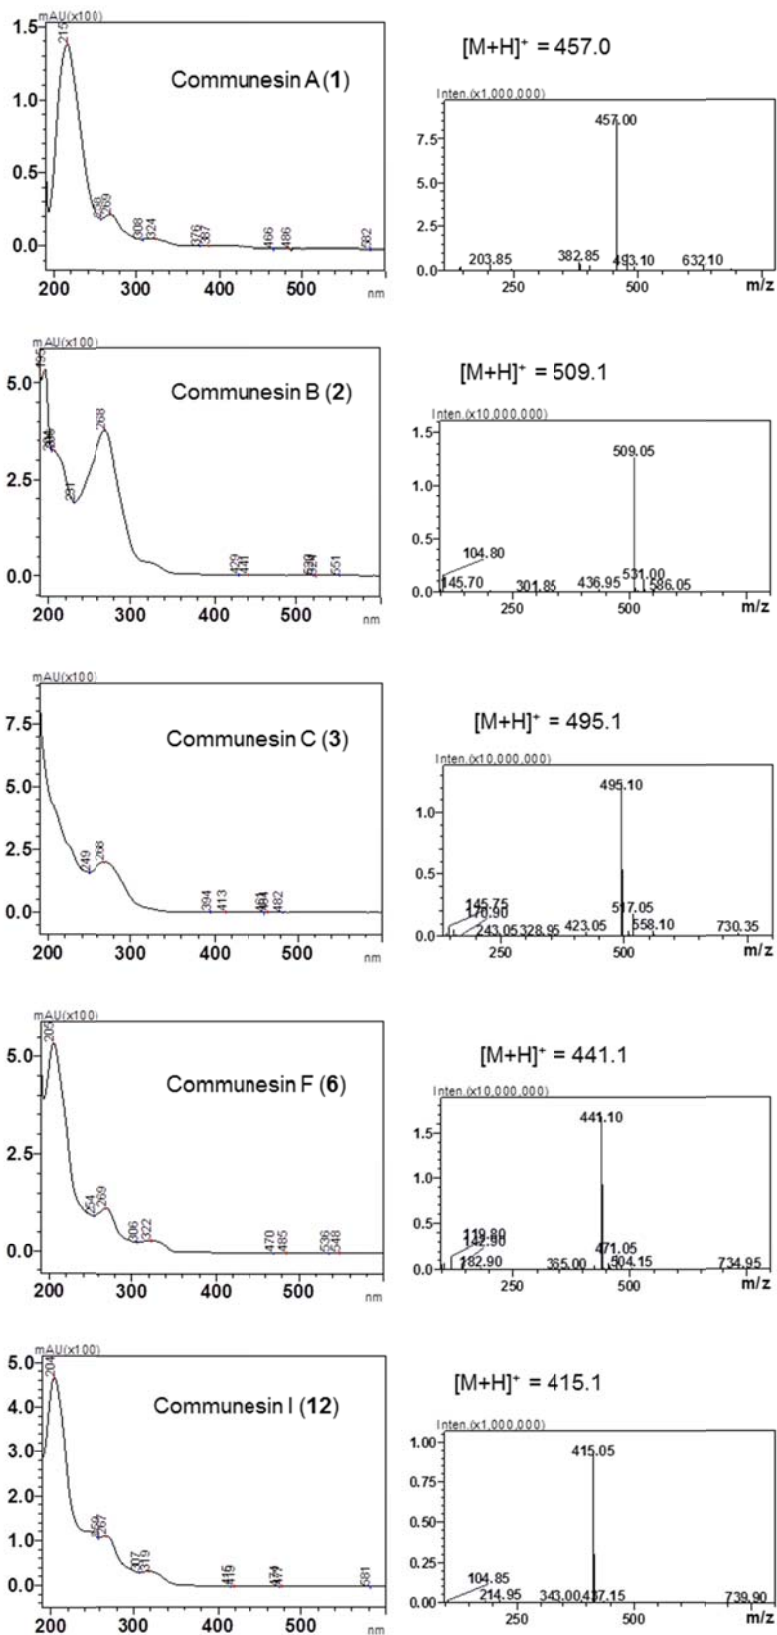

Figure S33. UV and MS spectra of 1–3, 6 and 12.

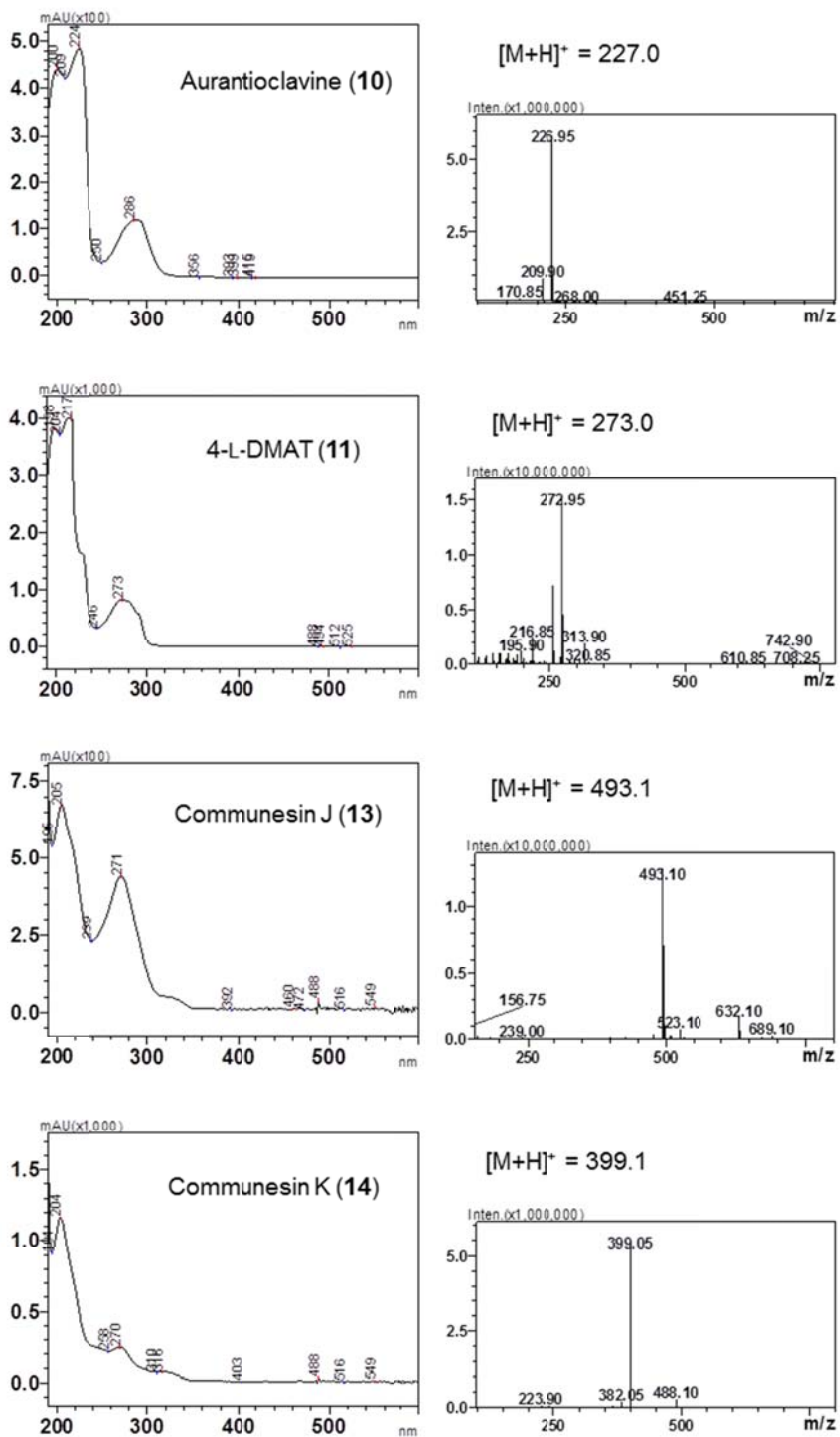

Figure S34. UV and MS spectra of **10**, **11**, **13** and **14**.

## Supplementary References

- [1] E. Kafer, *Adv. Genet.* **1977**, *19*, 33.
- [2] J. Sambrook, D. W. Russell, *Molecular cloning: a laboratory manual, Vol. 1*, CSHL press, **2001**.
- [3] R. Q. Li, H. M. Zhu, J. Ruan, W. B. Qian, X. D. Fang, Z. B. Shi, Y. R. Li, S. T. Li, G. Shan, K. Kristiansen, S. G. Li, H. M. Yang, J. Wang, *Genome Res.* **2010**, *20*, 265.
- [4] E. Szewczyk, T. Nayak, C. E. Oakley, H. Edgerton, Y. Xiong, N. Taheri-Talesh, S. A. Osmani, B. R. Oakley, *Nat. Protoc.* **2007**, *1*, 3111.
- [5] J. B. Kieler, K. L. Duong, W. S. Moye-Rowley, J. S. Klutts, *J. Microbiol. Methods* **2013**, *95*, 373.
- [6] A. Numata, C. Takahashi, Y. Ito, T. Takada, K. Kawai, Y. Usami, E. Matsumura, M. Imachi, T. Ito, T. Hasegawa, *Tetrahedron Lett.* **1993**, *34*, 2355; Z. Zuo, D. Ma, *Angewandte Chemie-International Edition* **2011**, *50*, 12008.
- [7] H. Hayashi, H. Matsumoto, K. Akiyama, "Biosci. Biotechnol., Biochem. " **2004**, *68*, 753; R. Jadulco, R. A. Edrada, R. Ebel, A. Berg, K. Schaumann, V. Wray, K. Steube, P. Proksch, *J. Nat. Prod.* **2004**, *67*, 78.
- [8] J. Belmar, R. L. Funk, *J. Am. Chem. Soc.* **2012**, *134*, 16941; Z. W. Zuo, W. Q. Xie, D. W. Ma, *J. Am. Chem. Soc.* **2010**, *132*, 13226.
- [9] S. Krishnan, J. T. Bagdanoff, D. C. Ebner, Y. K. Ramtohul, U. K. Tambar, B. M. Stoltz, *J. Am. Chem. Soc.* **2008**, *130*, 13745.
- [10] J. A. McIntosh, M. S. Donia, S. K. Nair, E. W. Schmidt, *J. Am. Chem. Soc.* **2011**, *133*, 13698.
- [11] H. Hikawa, Y. Yokoyama, Y. Murakami, *Synthesis-Stuttgart* **2000**, 214.
